# Supplementary material for: Experimental quantification of balance using whole-body stability regions from postural sway exercises
Source: Research Square preprint supplement (doi:10.21203/rs.3.rs-8139023/v1), 2025-12-04
Supplement: Supplementary file 2 [file 6978be15d3f8d54420b2ce38.docx]

**Table 3** Post-hoc test p-values of task differences in COP measures

|  | RMS | Confidence Ellipse Area | Mean Velocity | Range |
| --- | --- | --- | --- | --- |
| VS-SSF | 0.0151 | 0.3623 | 0.0199 | 0.5820 |
| VS-SSB | **<0.001*** | 0.0098 | **<0.001*** | **<0.001*** |
| VS-PF | **<0.001*** | 0.0380 | **0.0019*** | 0.0397 |
| VS-PB | **<0.001*** | **0.0039*** | **<0.001*** | **<0.001*** |
| SSF-SSB | **<0.001*** | 0.1381 | 0.0138 | 0.0483 |
| SSF-PF | **0.0029*** | 0.2433 | **<0.001*** | 0.0972 |
| SSF-PB | **<0.001*** | 0.0839 | **<0.001*** | 0.1038 |
| SSB-PF | 0.6076 | 0.4388 | **<0.001*** | 0.2024 |
| SSB-PB | 0.0248 | 0.6297 | **<0.001*** | 0.2496 |
| PF-PB | 0.0135 | 0.3891 | 0.5012 | 0.6349 |

*denotes significance (*p*<0.005).
