# Supplementary figures and images for: Experimental quantification of balance using whole-body stability regions from postural sway exercises
Source: Research Square preprint supplement (doi:10.21203/rs.3.rs-8139023/v1), 2025-12-04

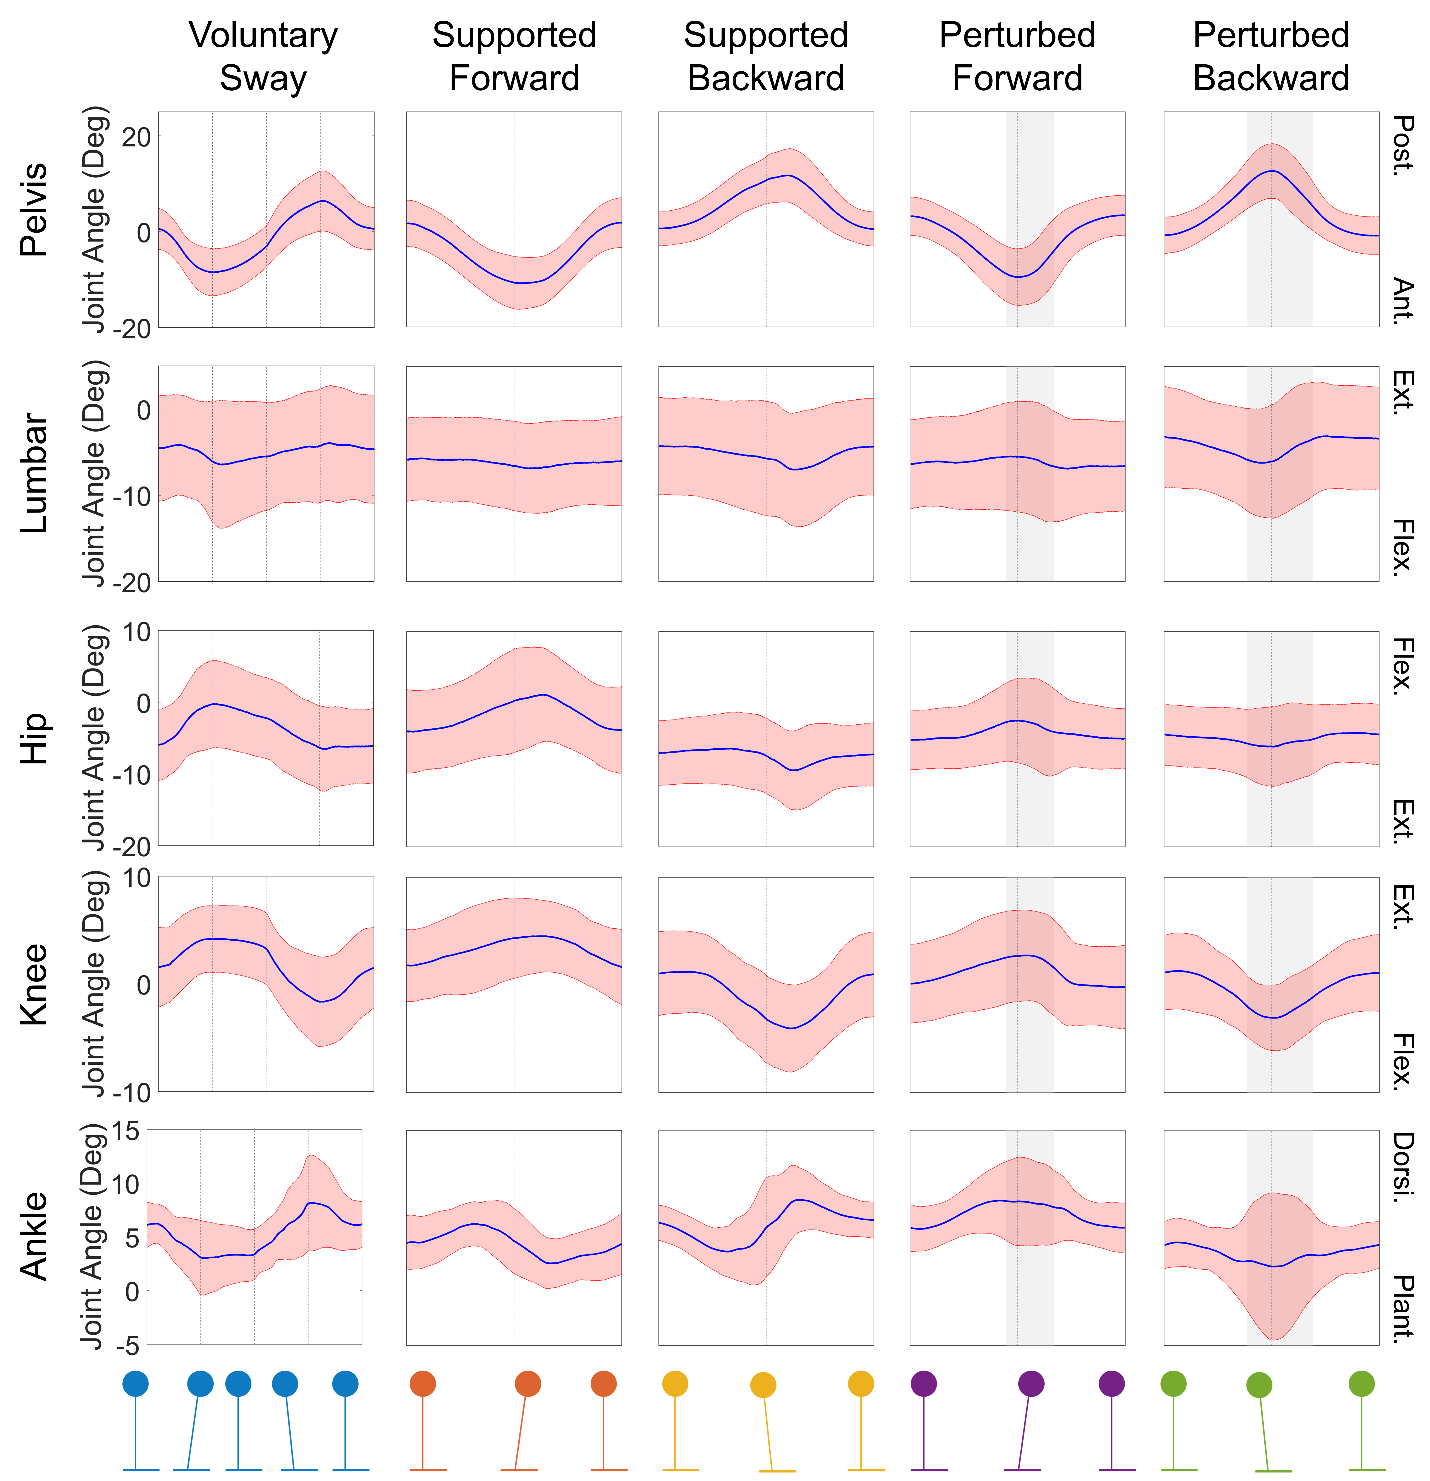


Figure S1: IK results of female subjects.


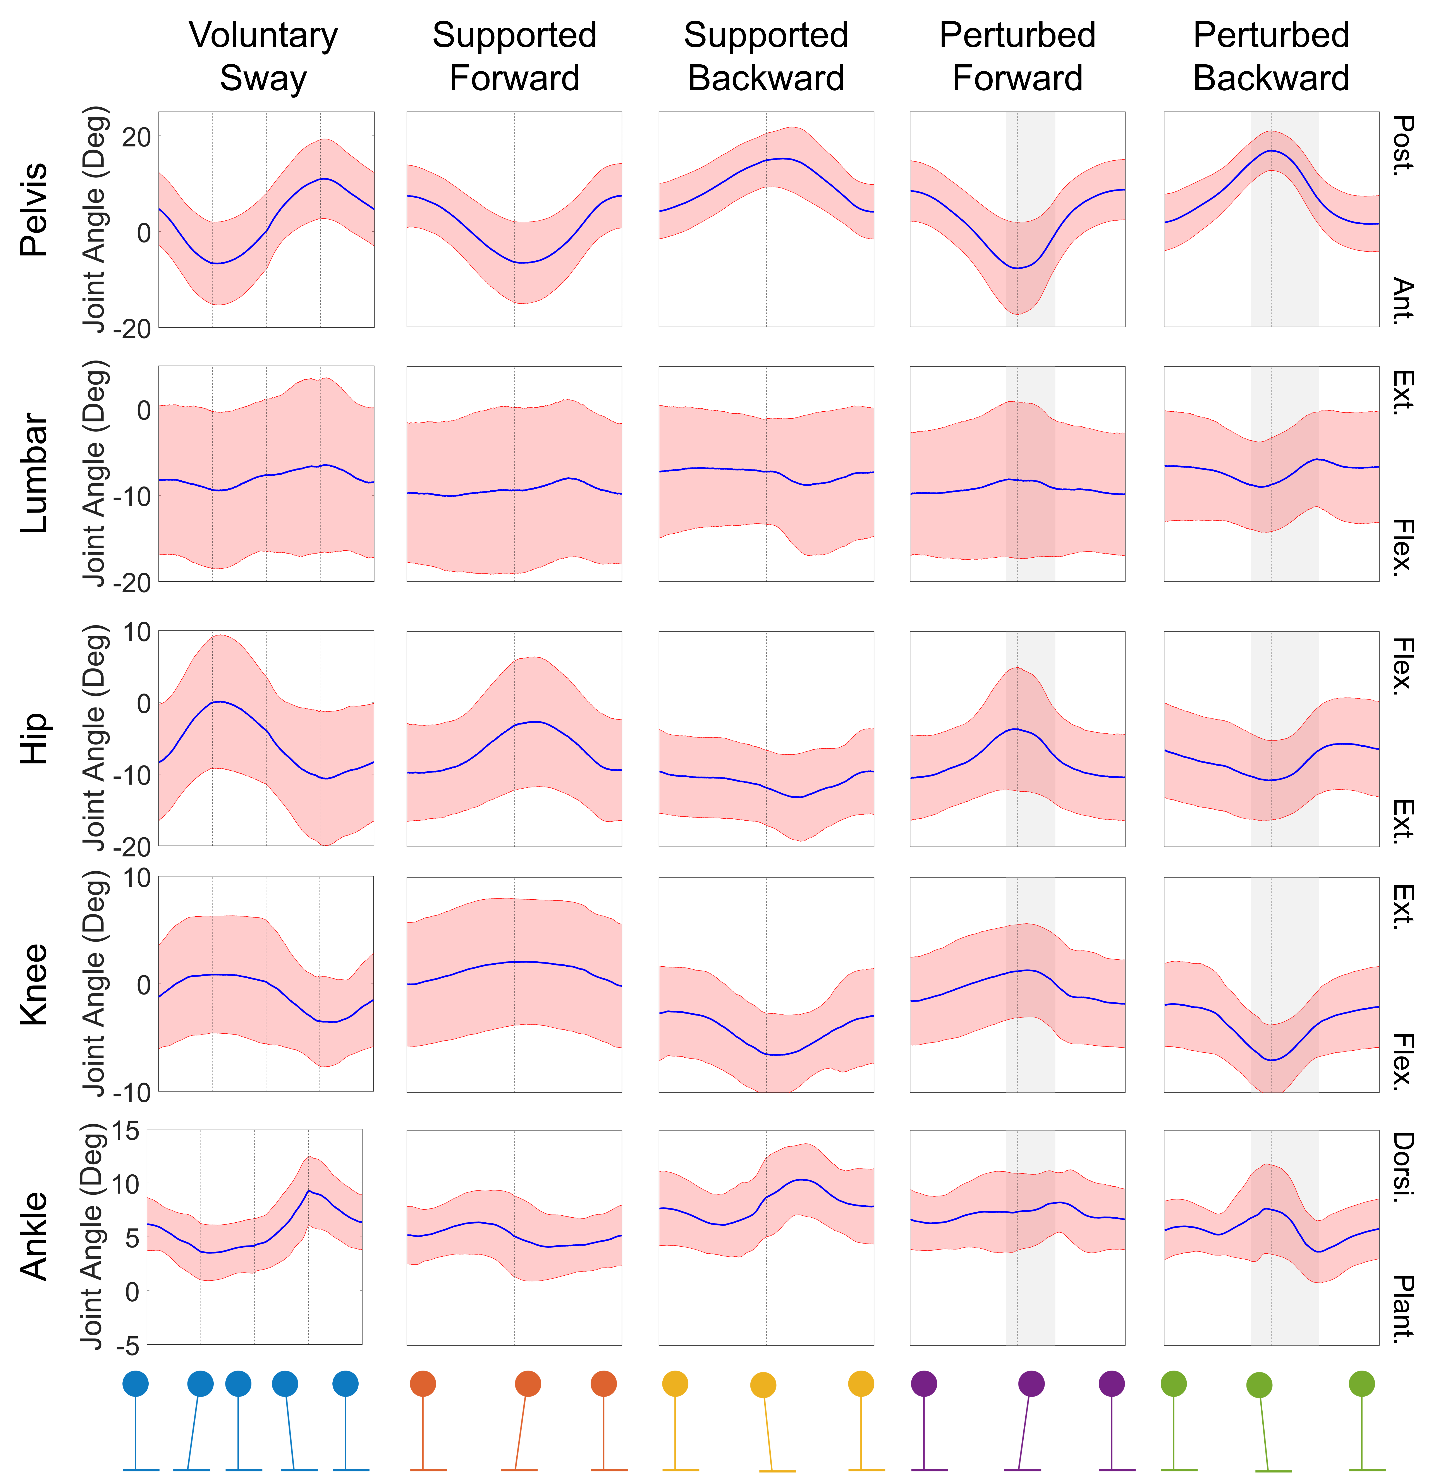


Figure S2. IK results of male subjects.

Supplement: Supplementary file 1 [file 3a846cff0d301f9ebfa87750.docx]

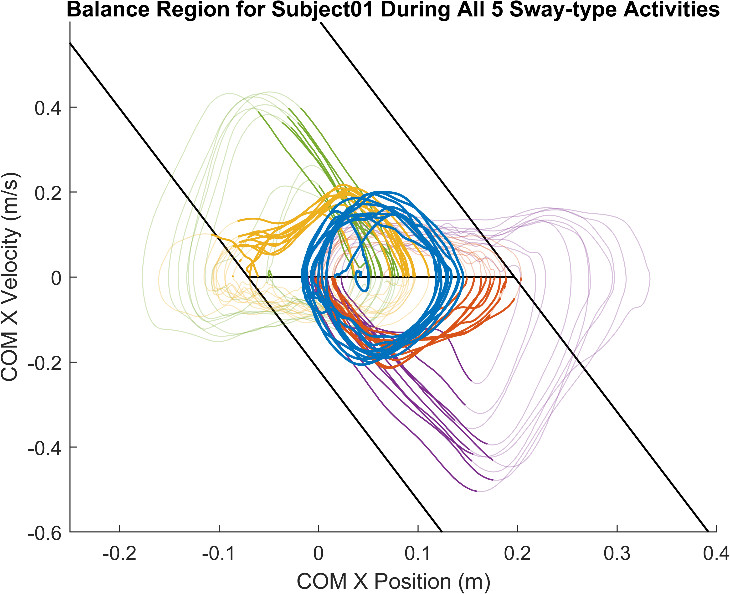

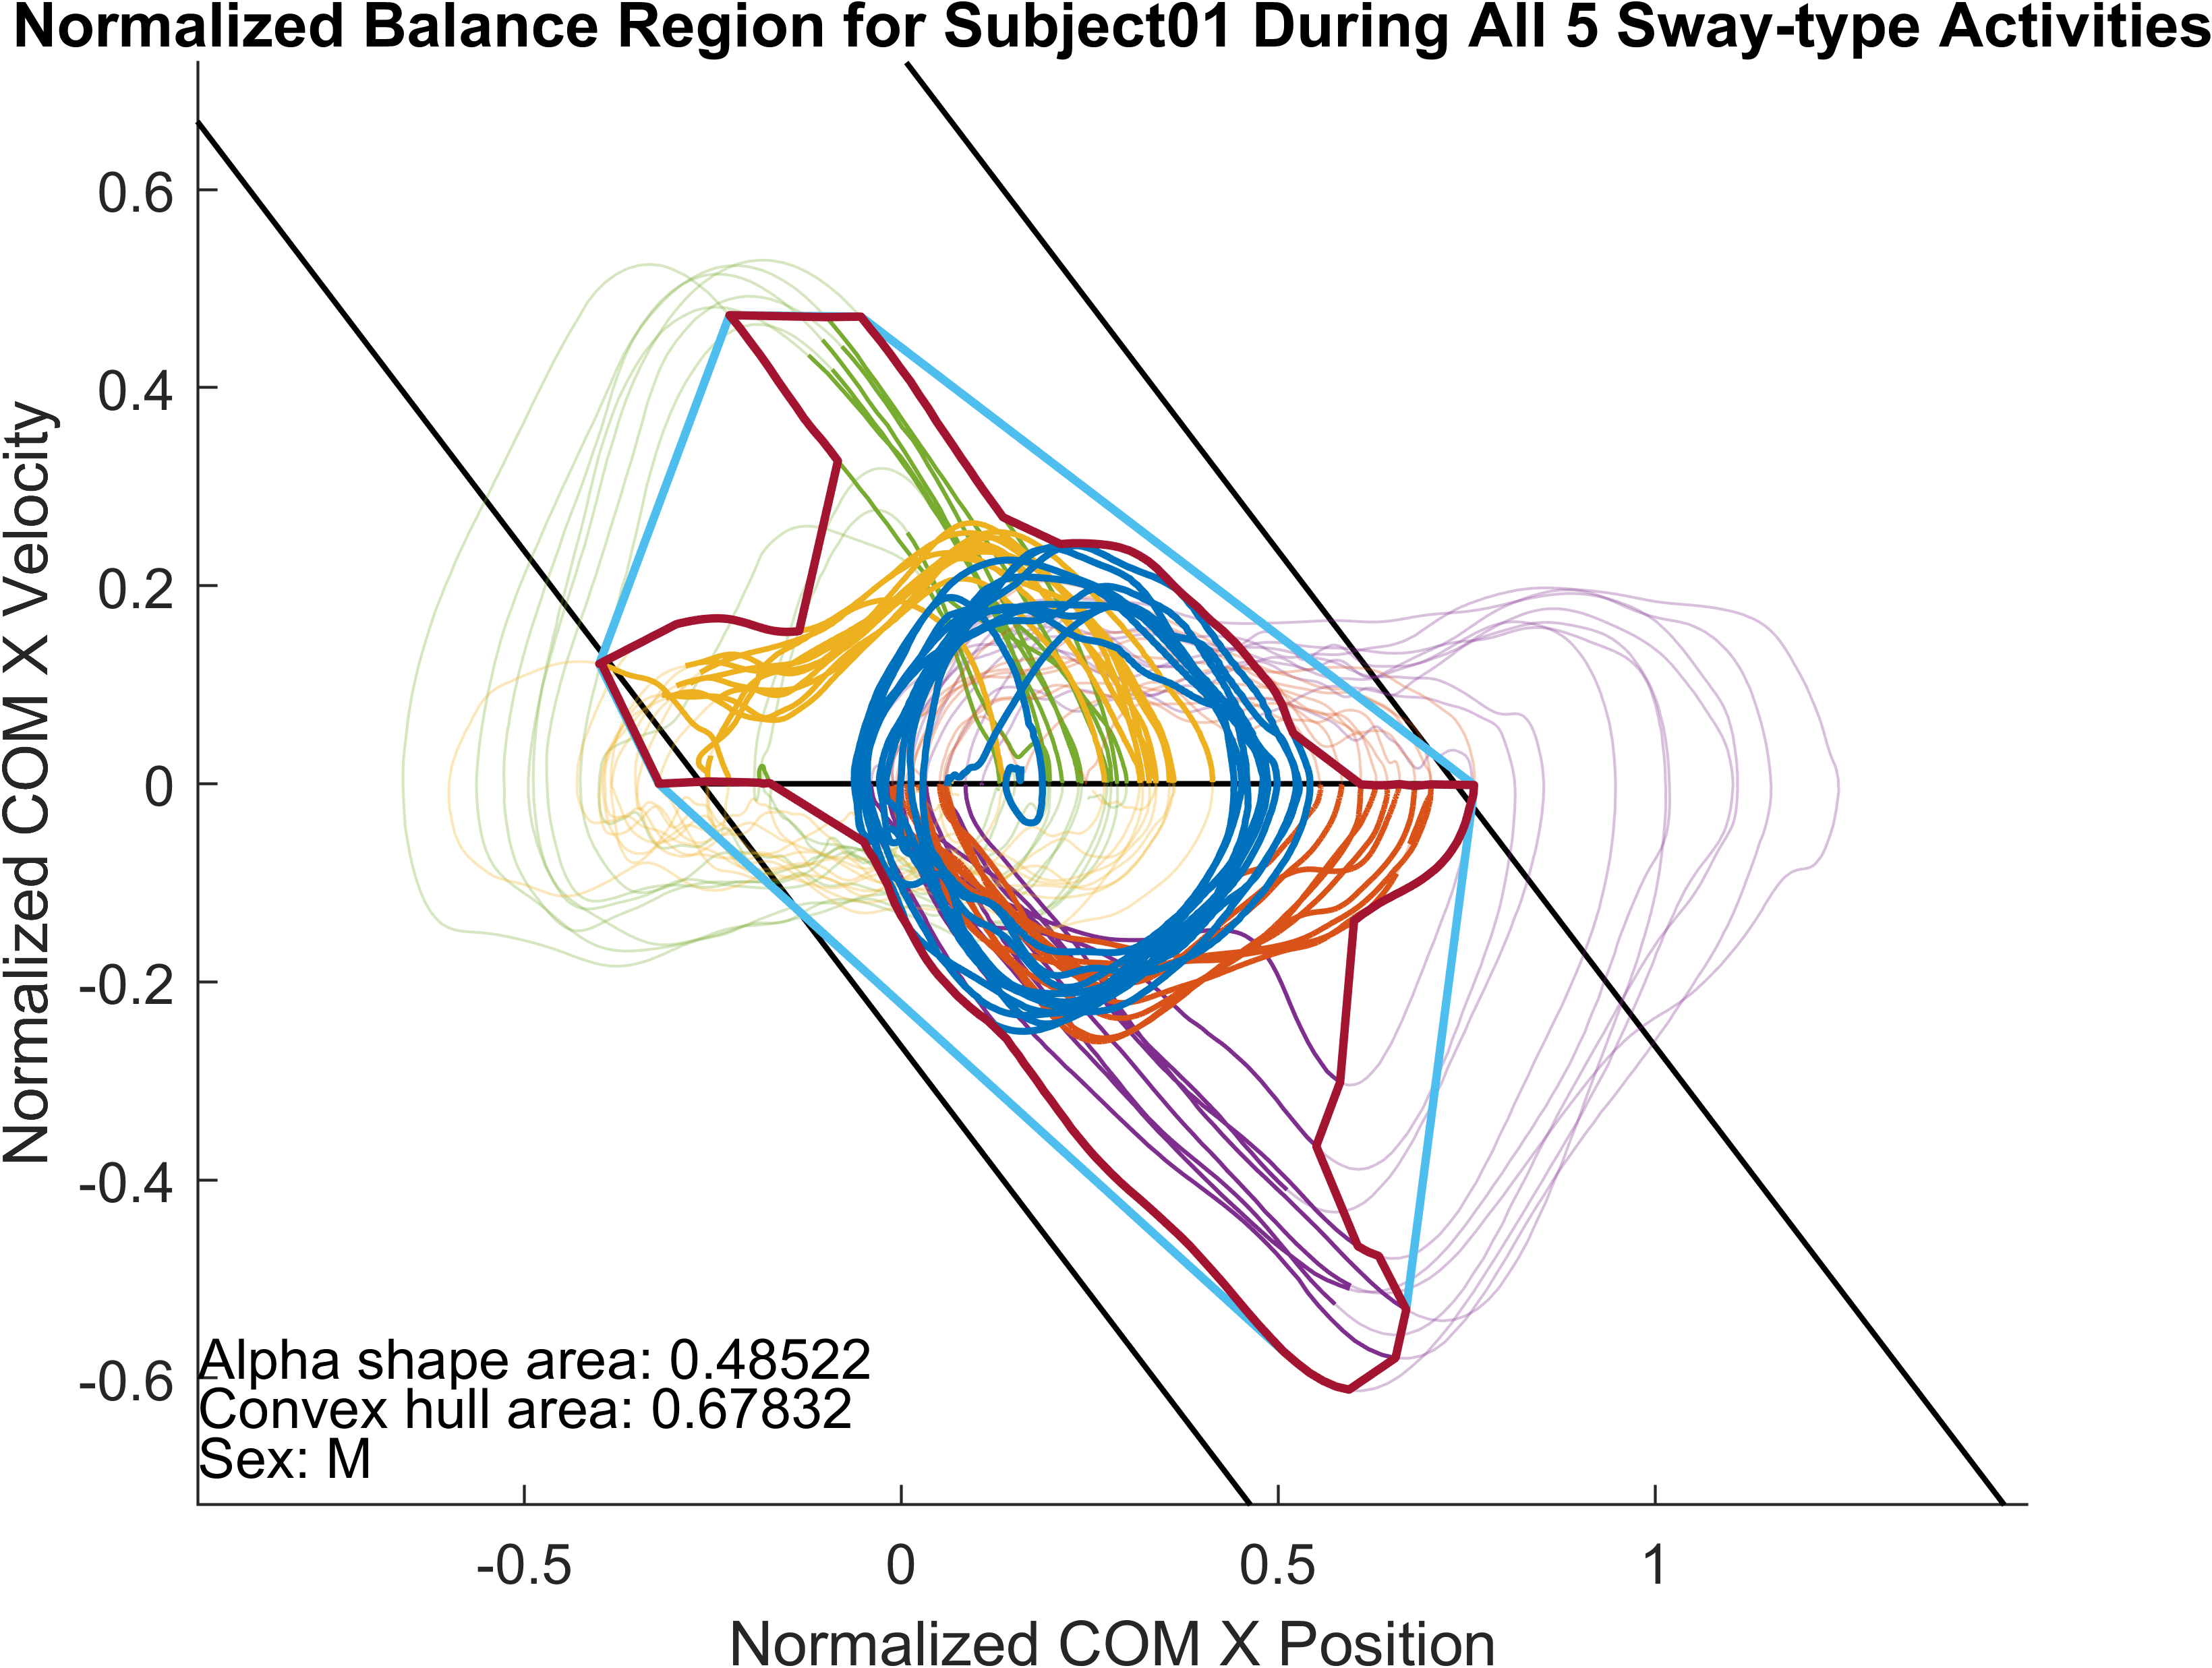


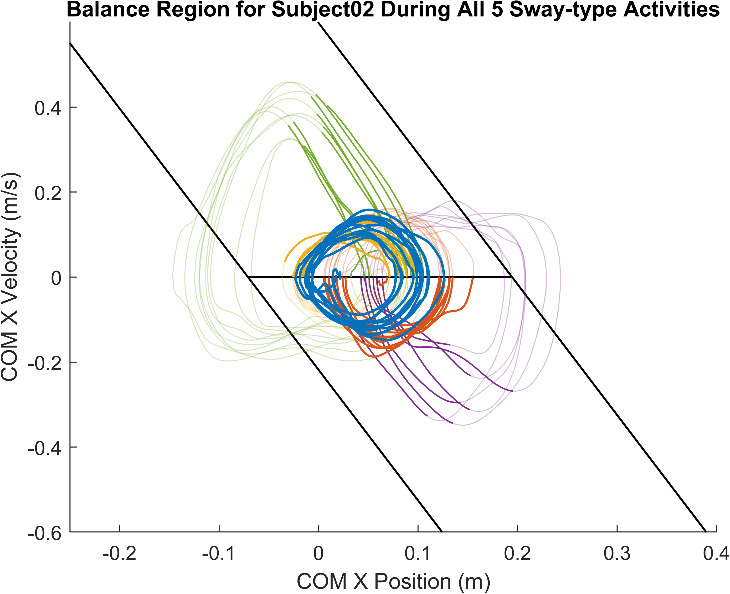

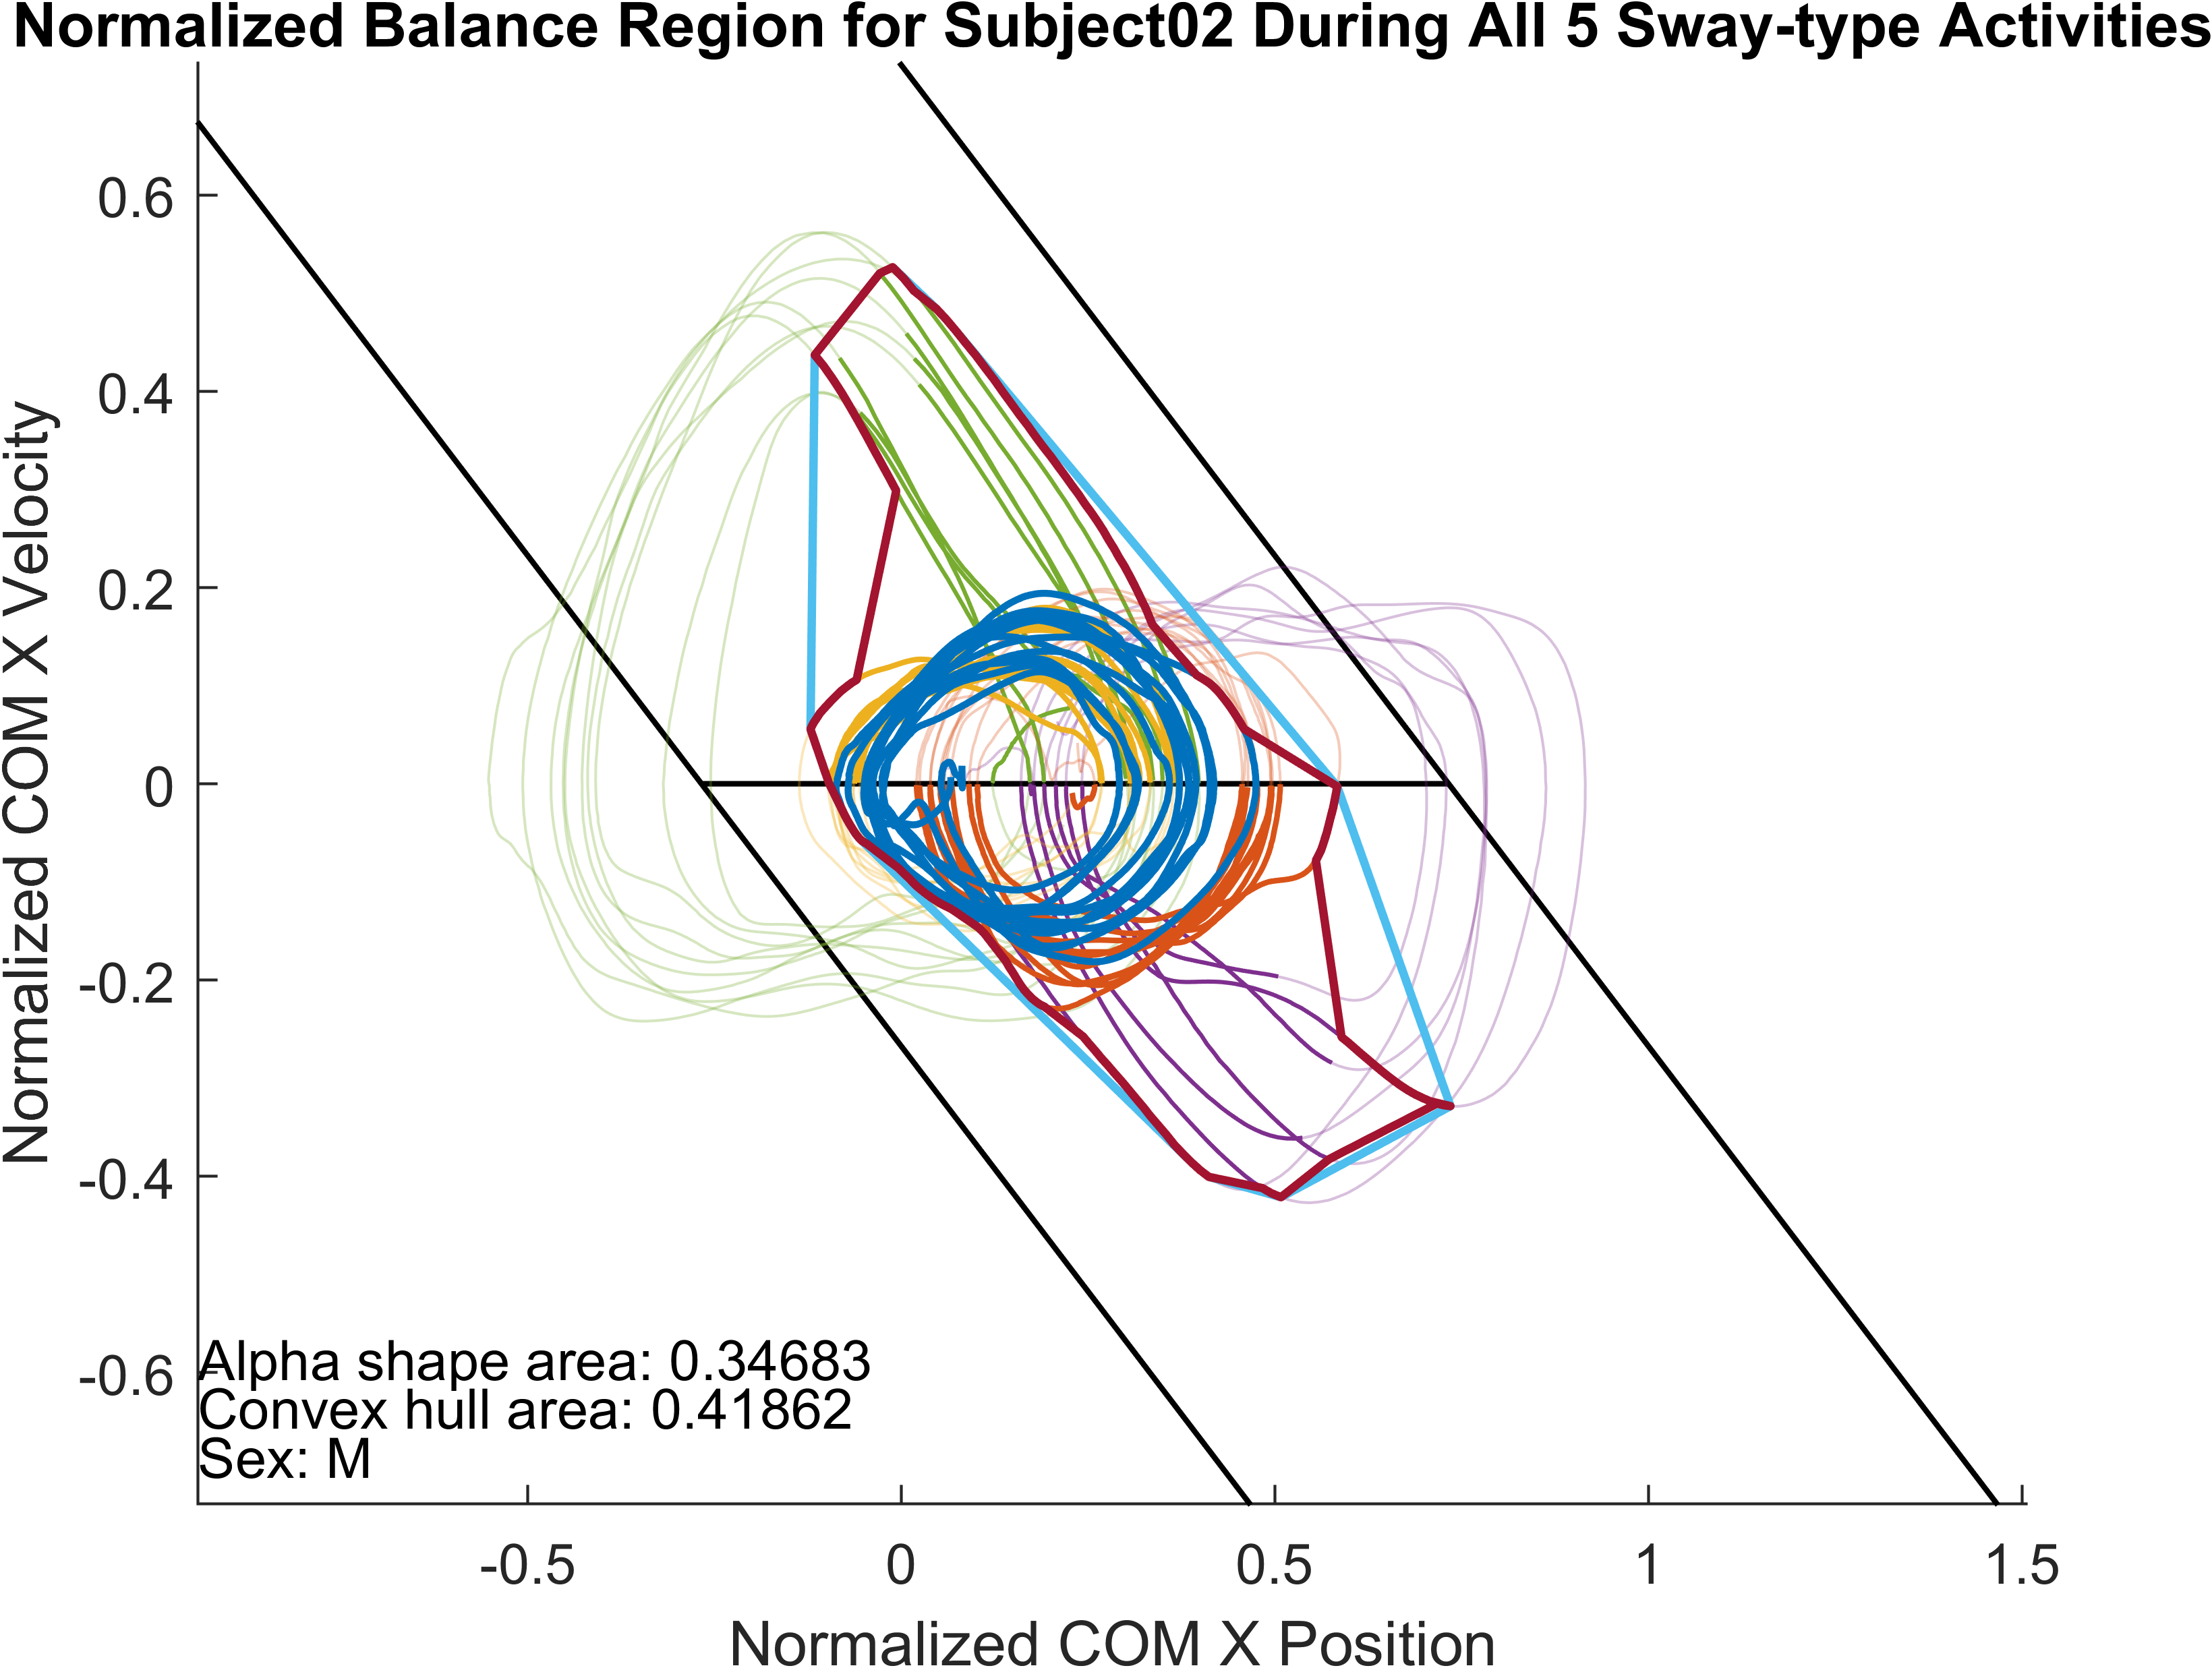

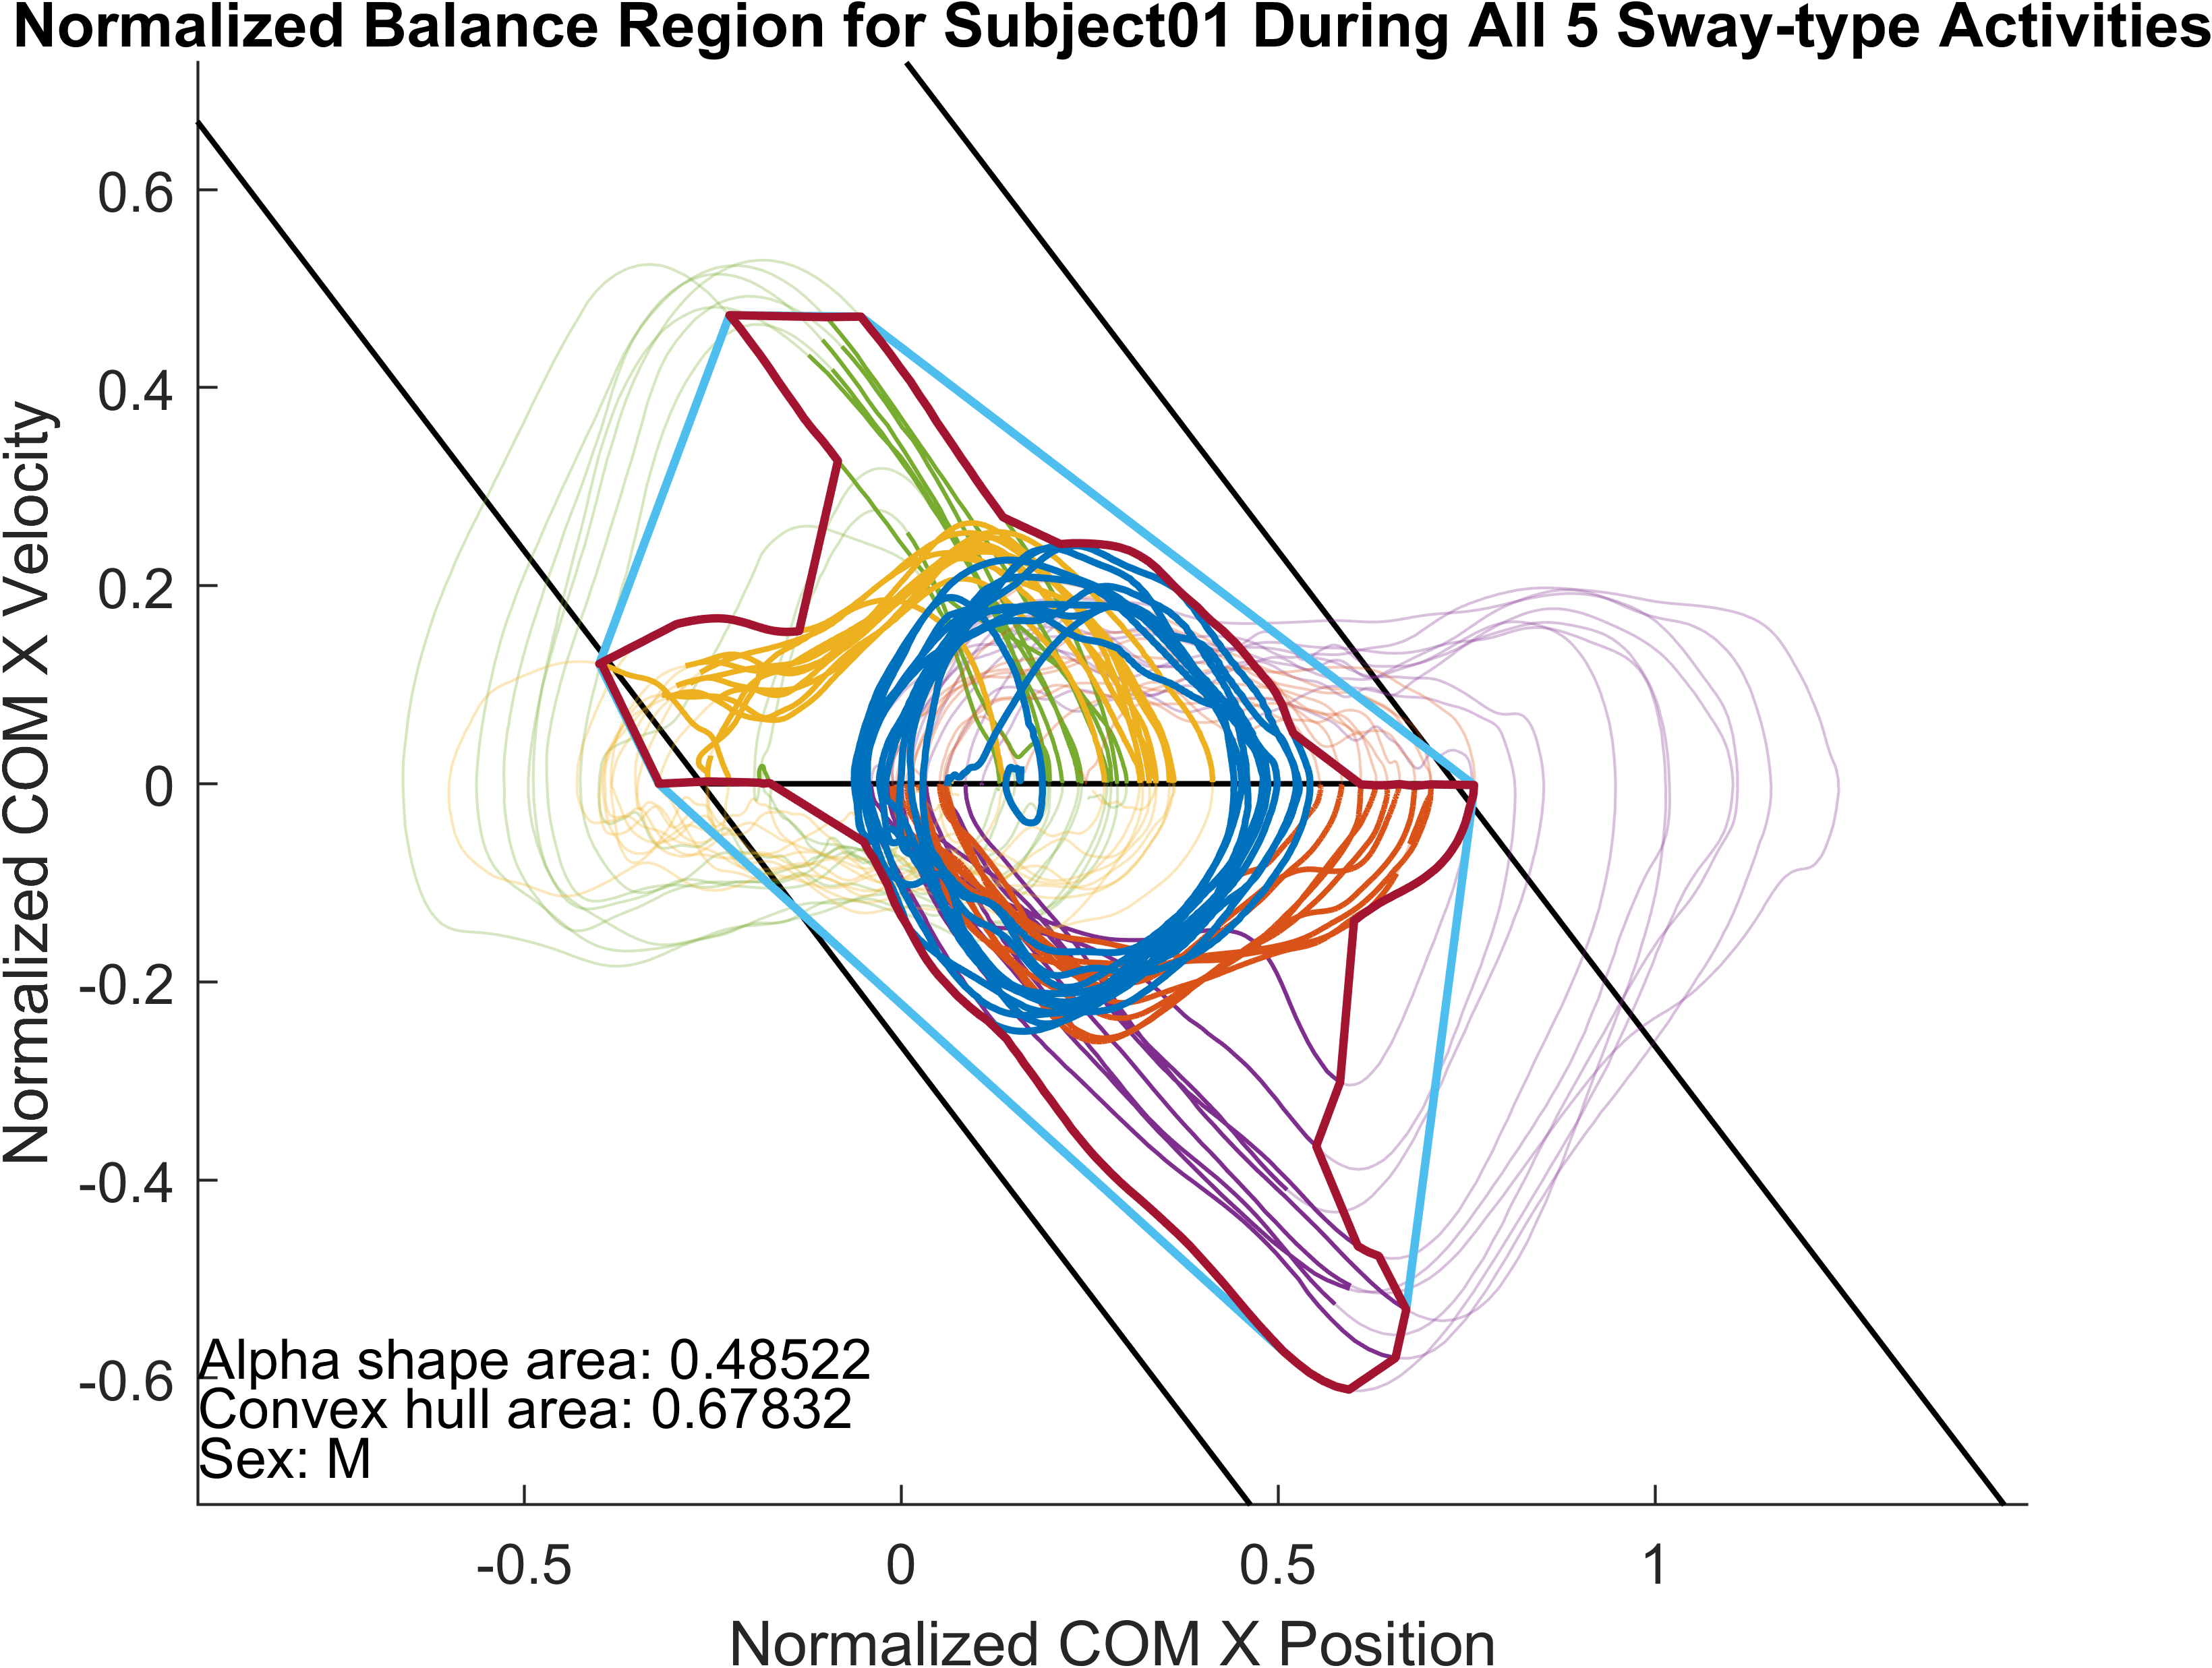


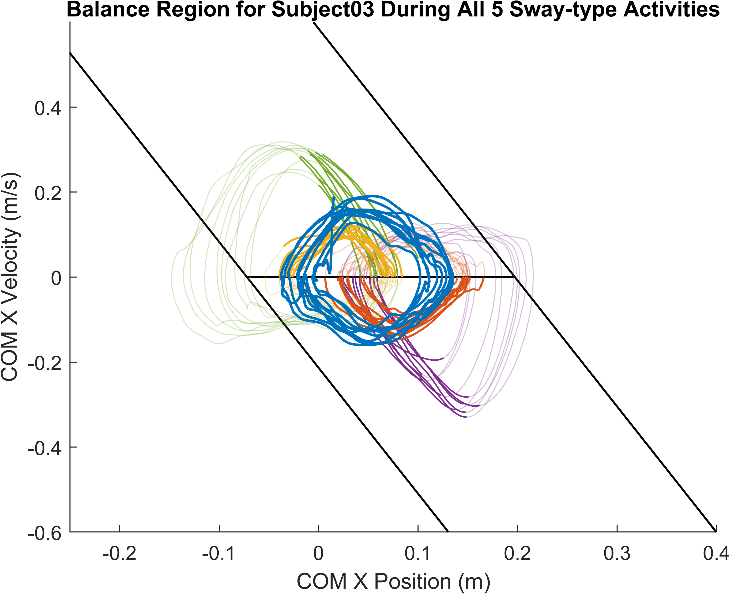

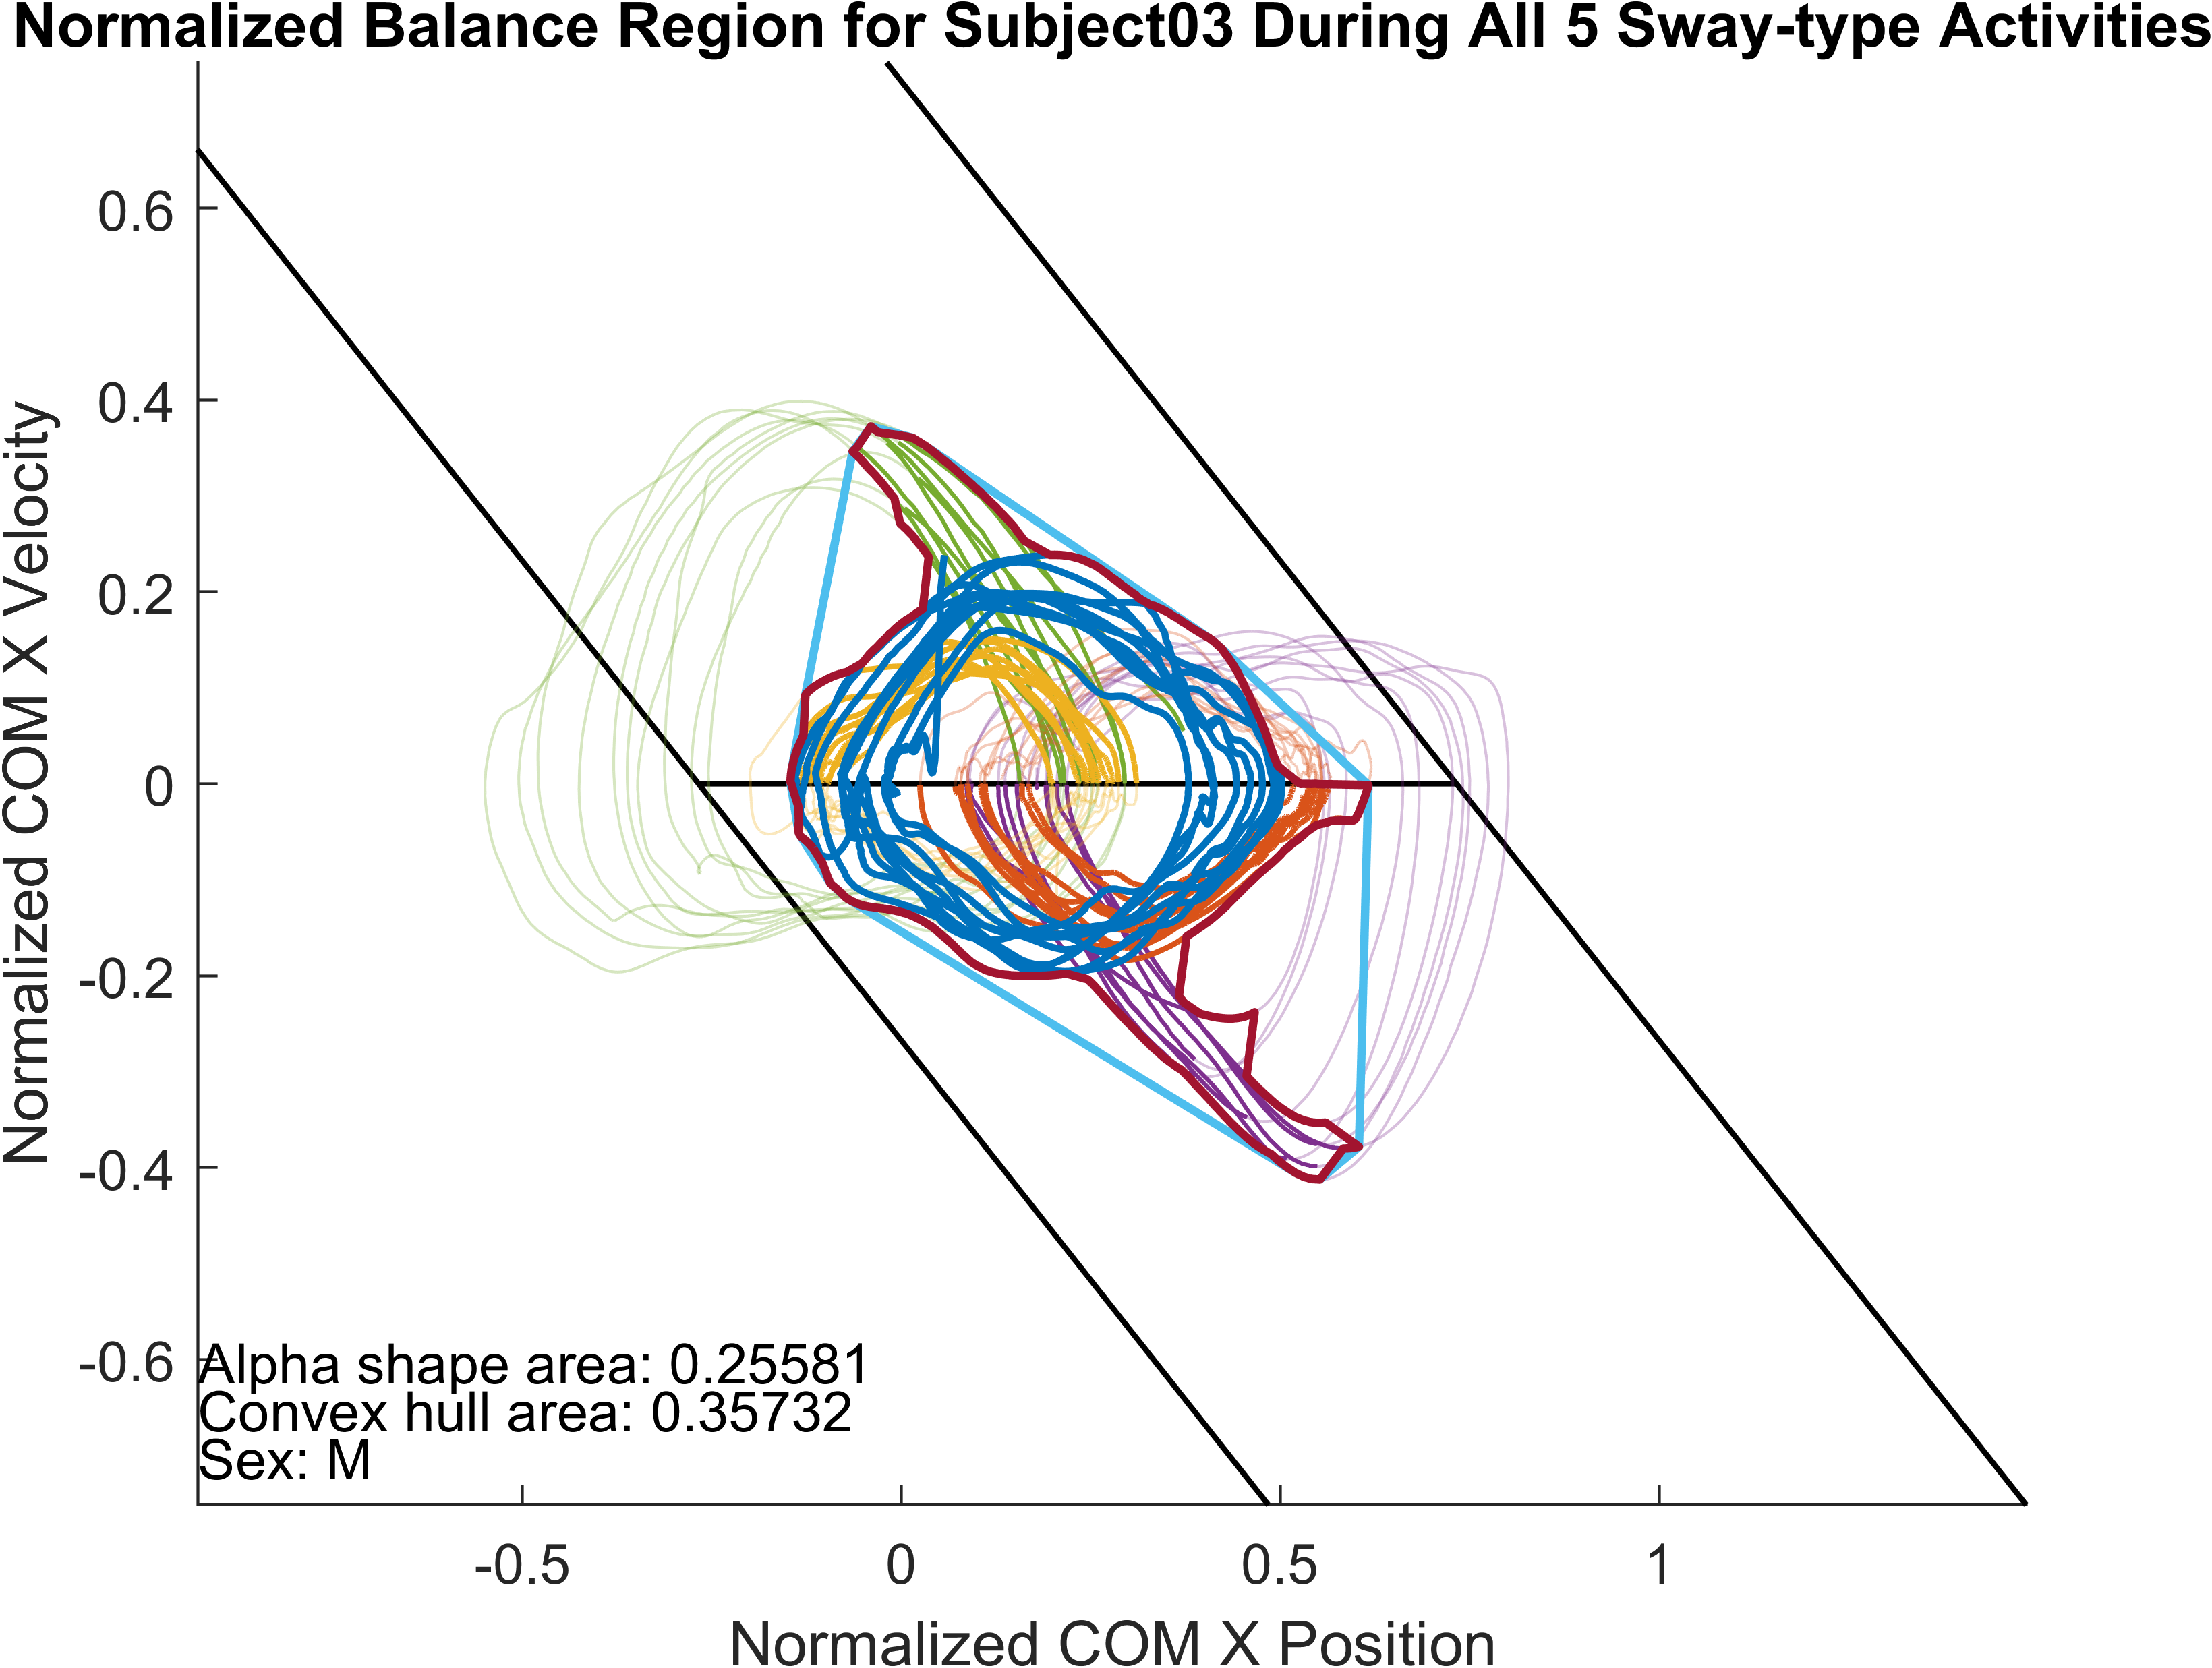

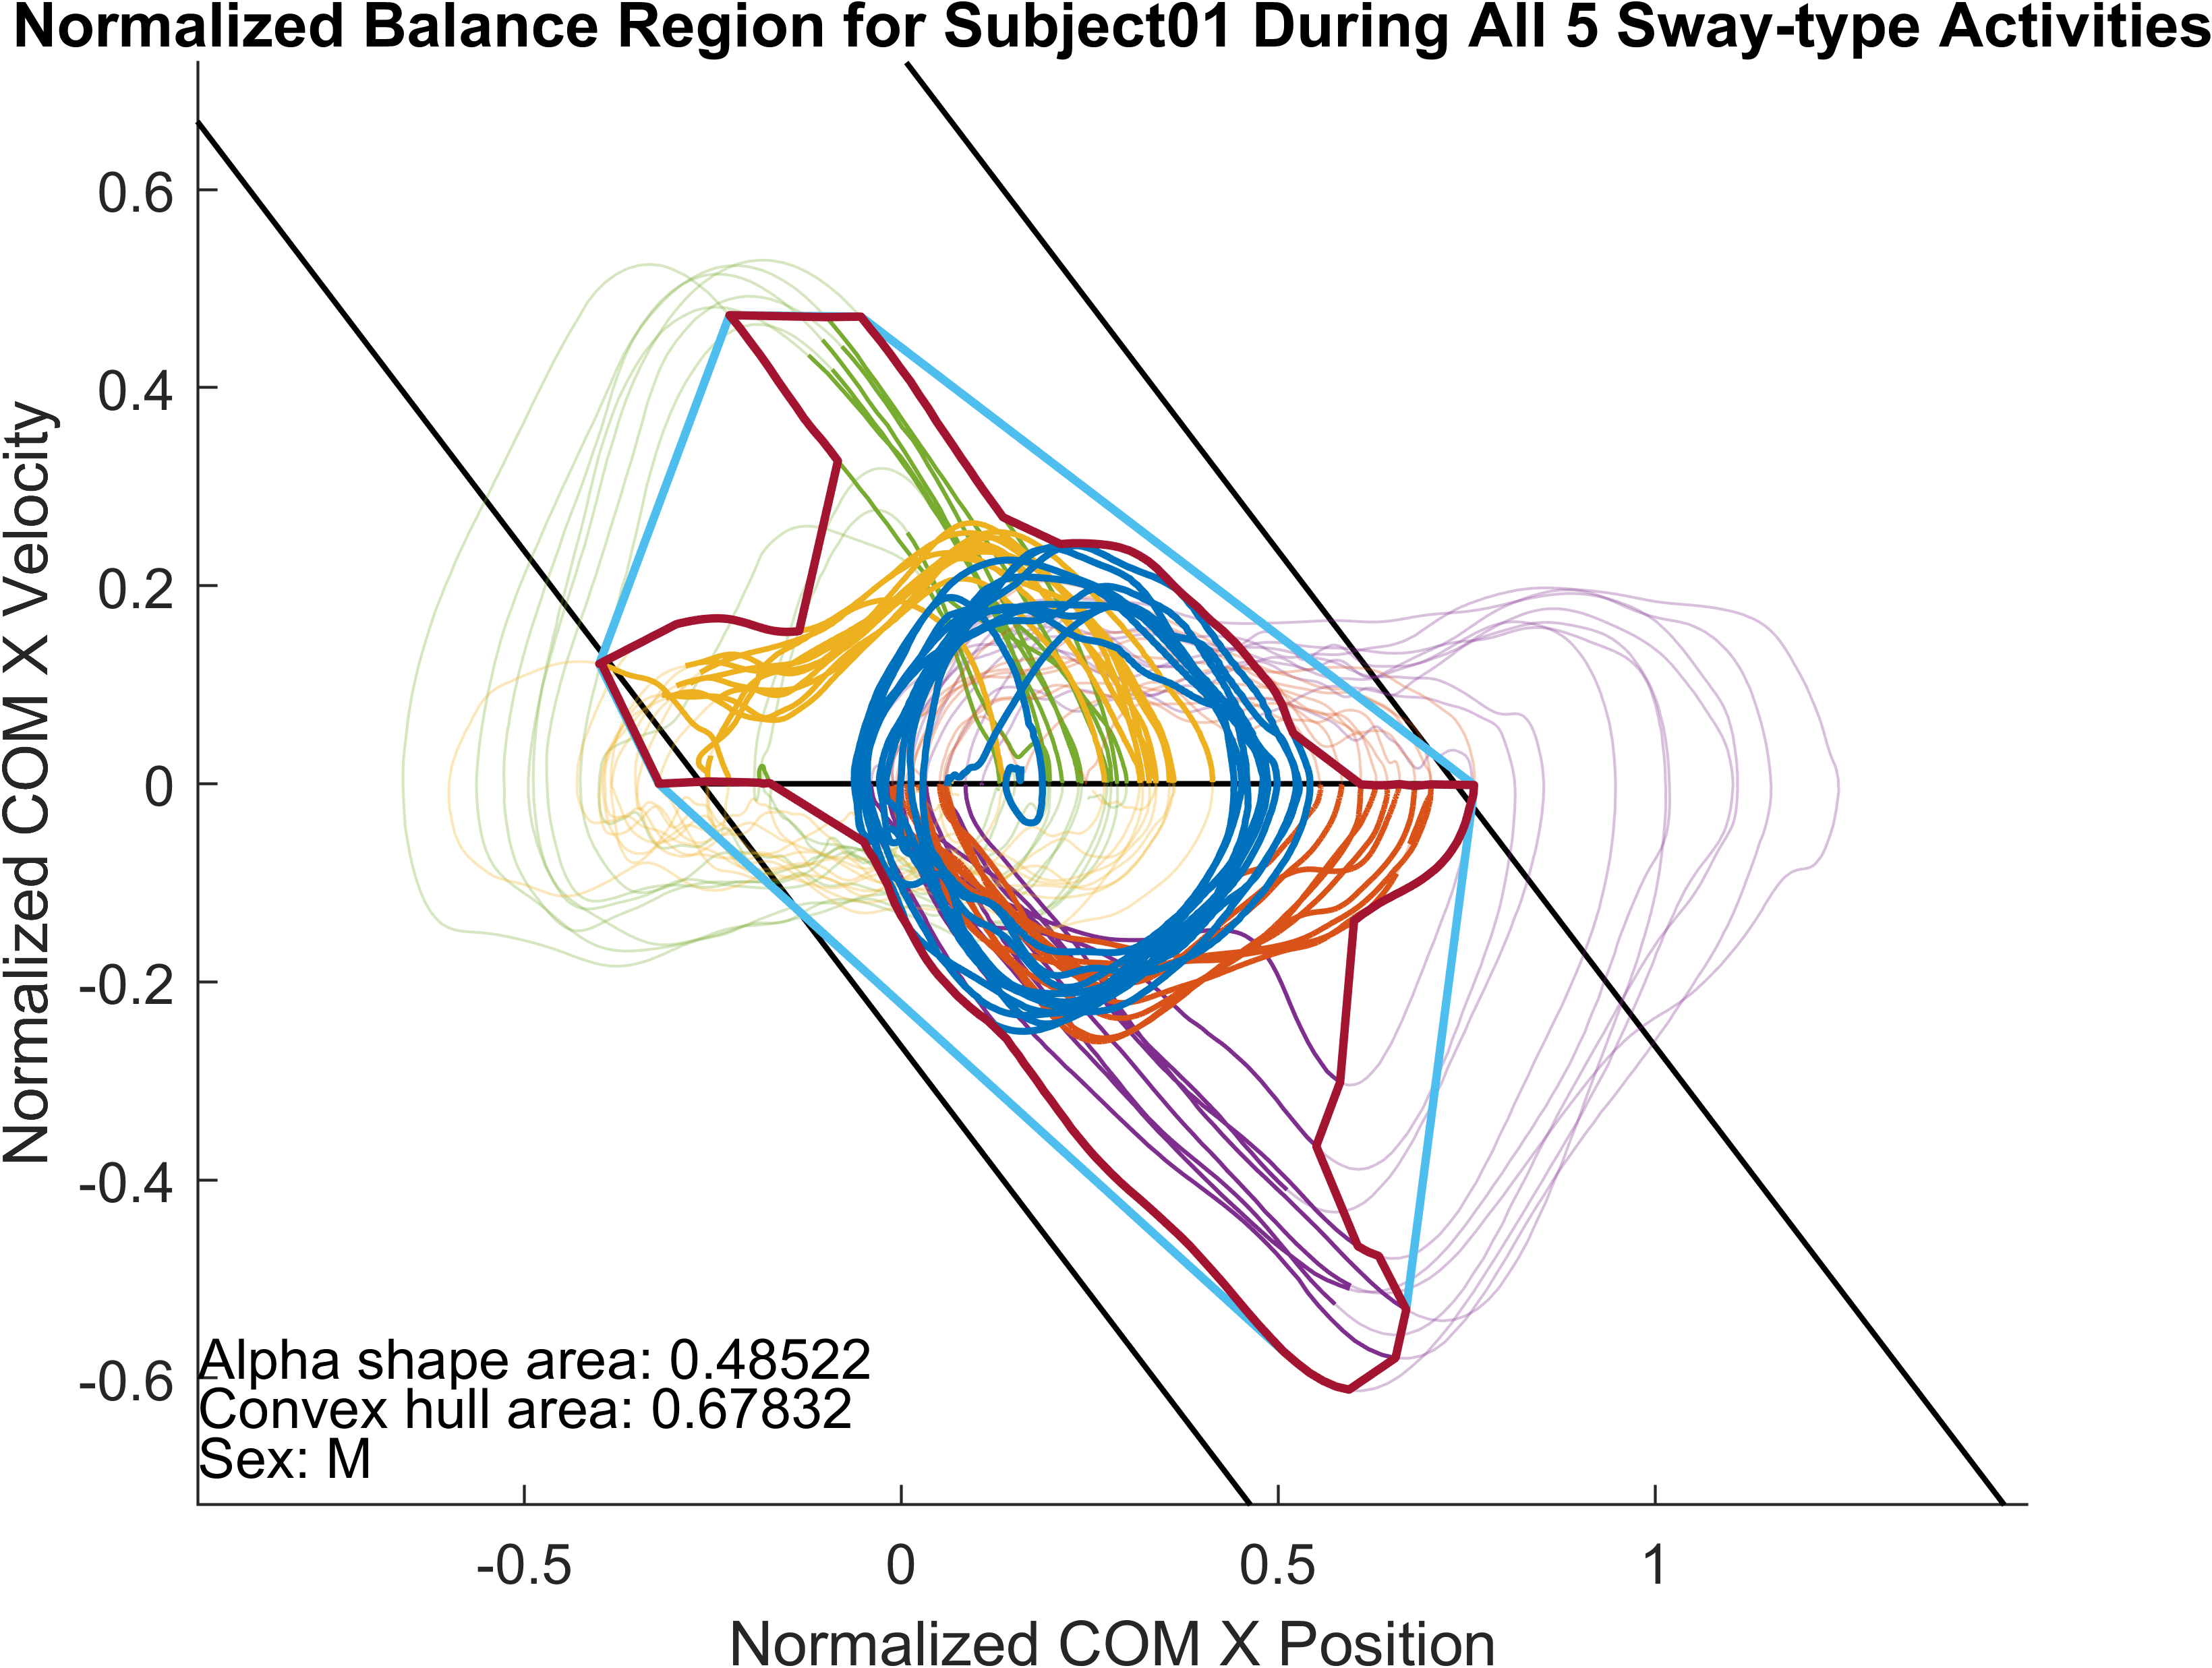


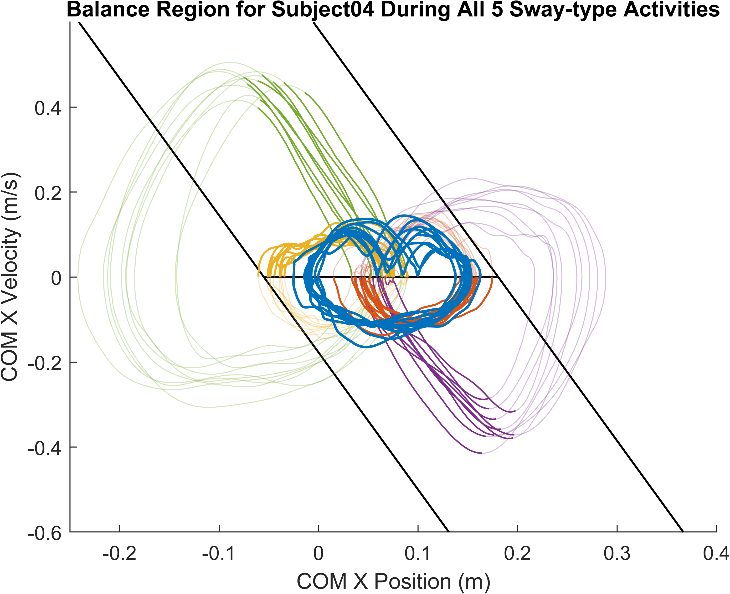

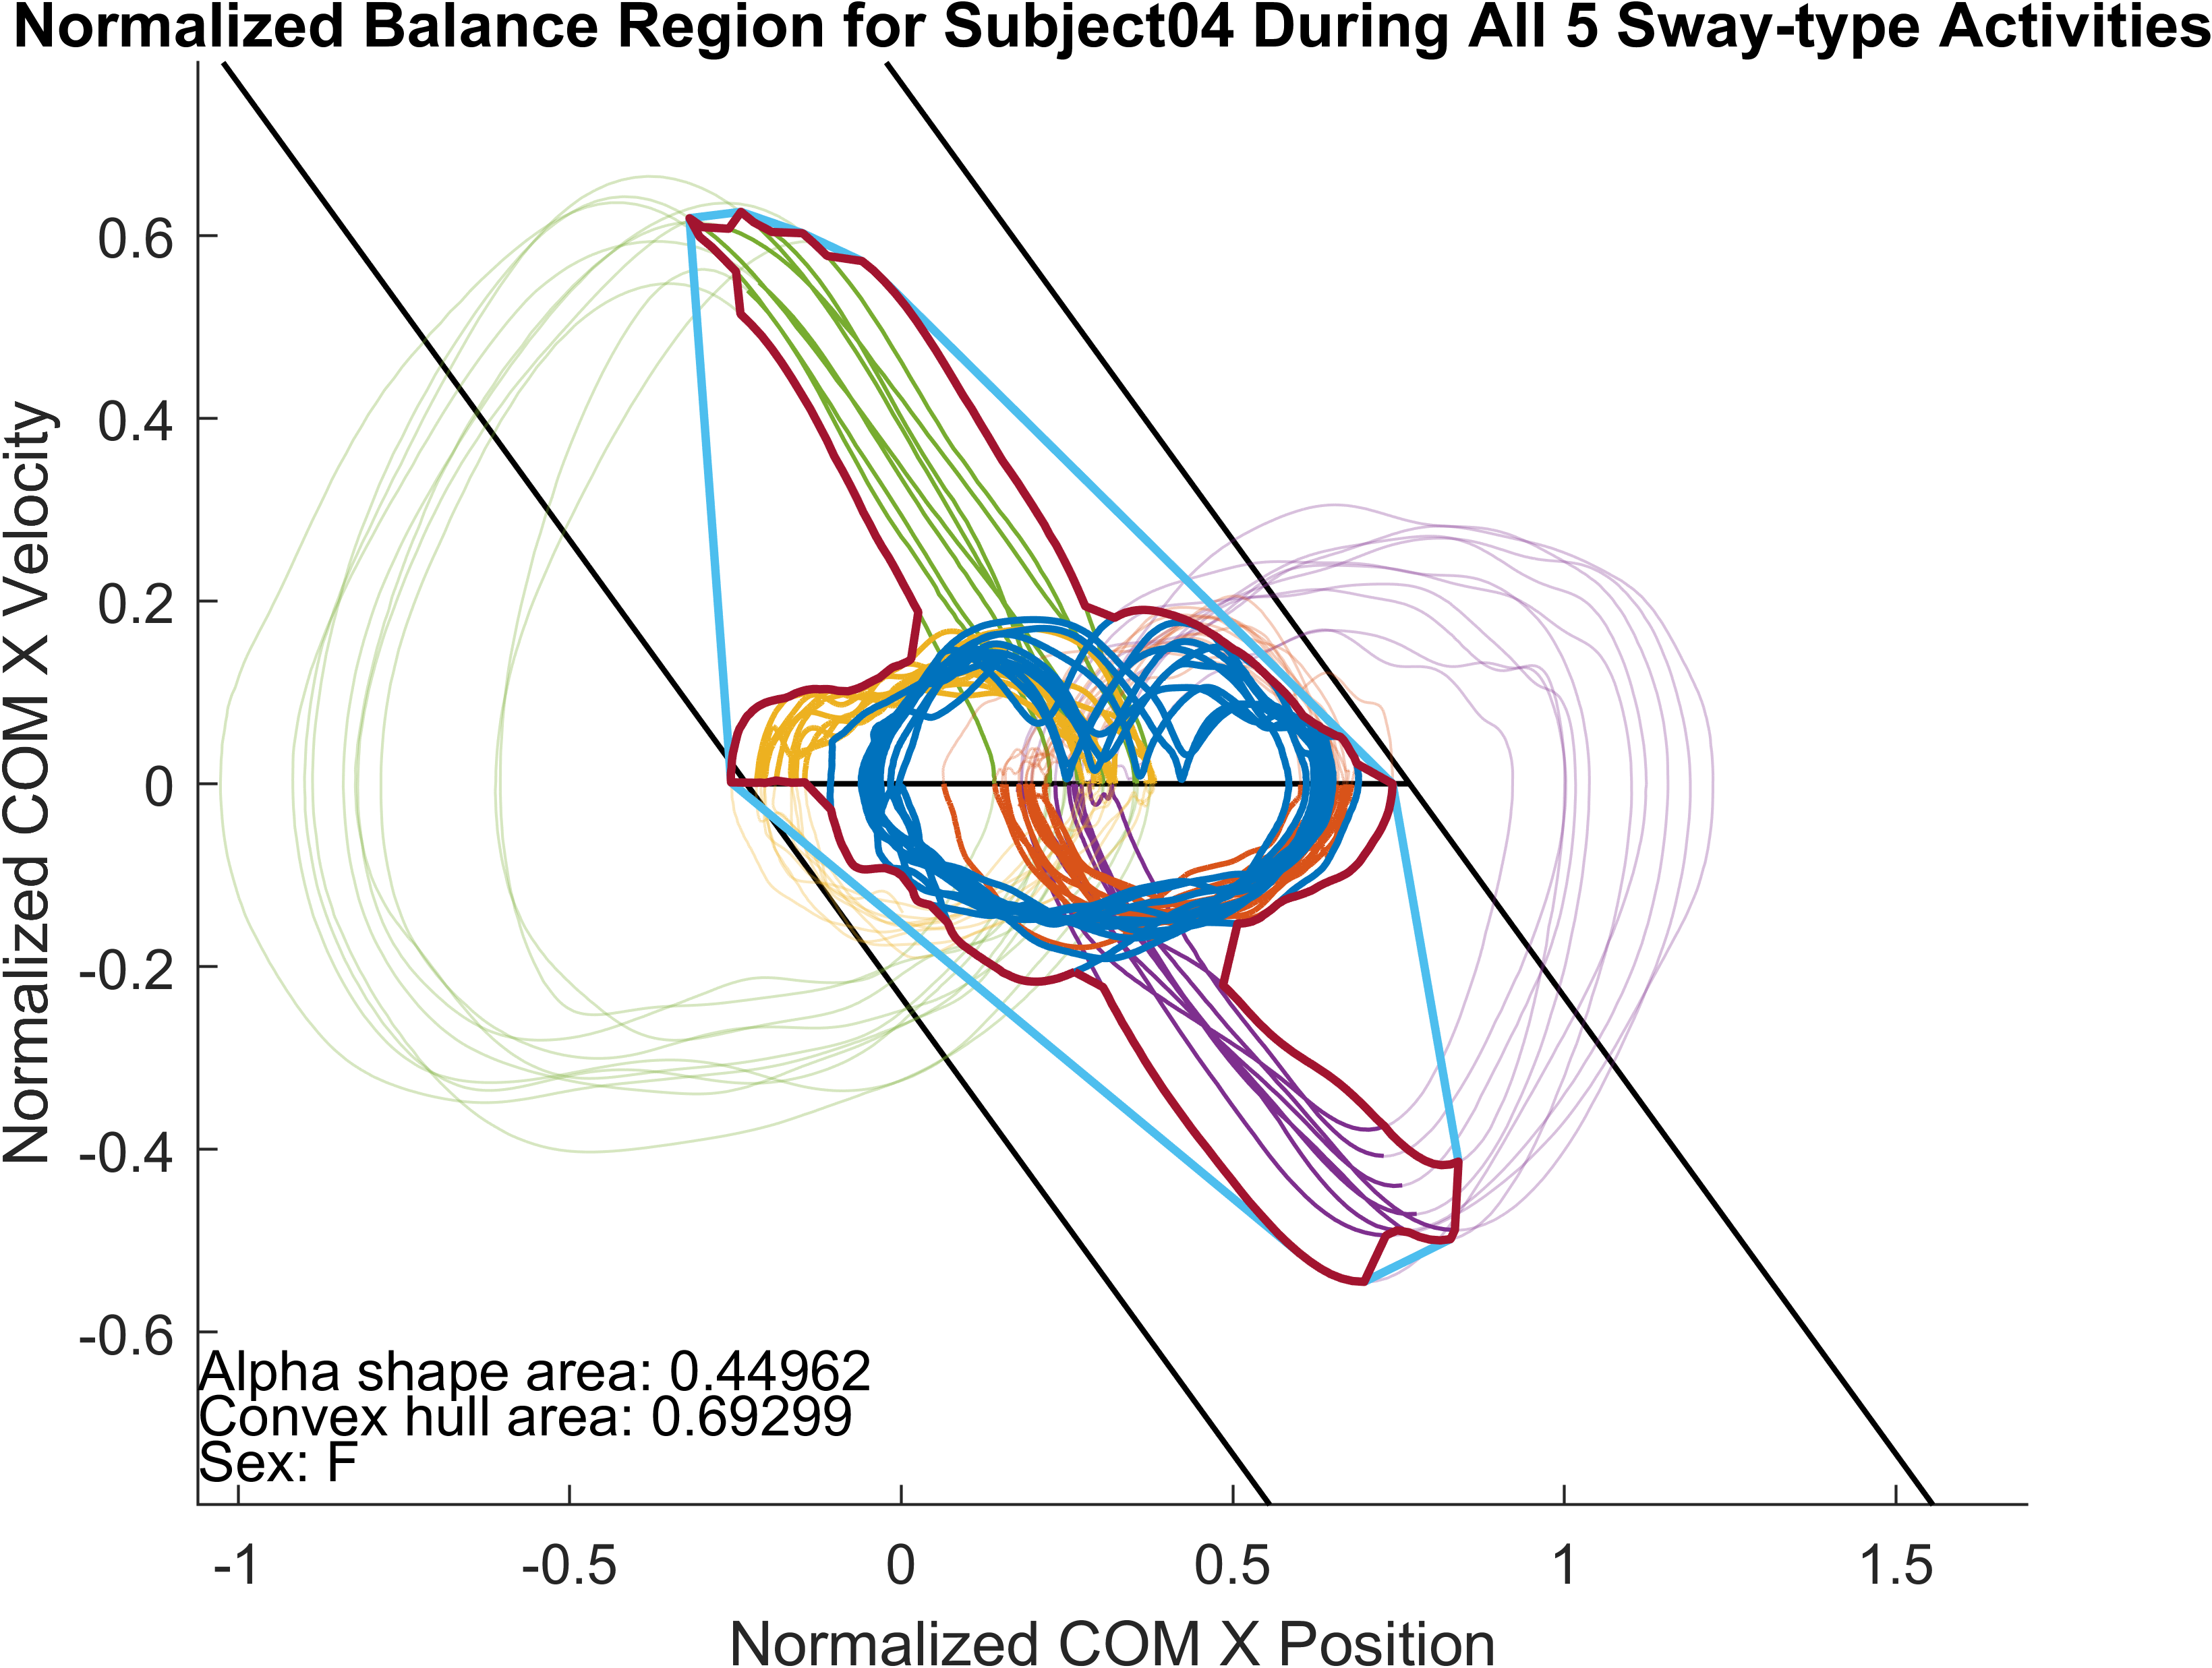


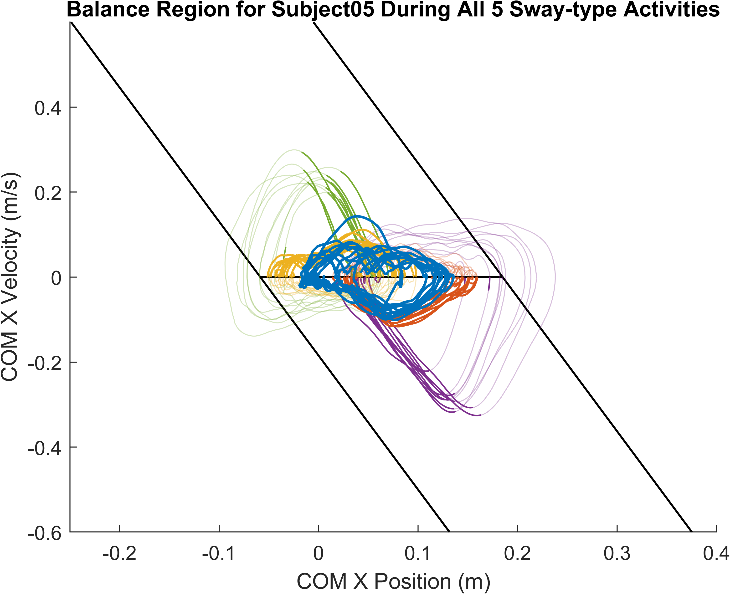

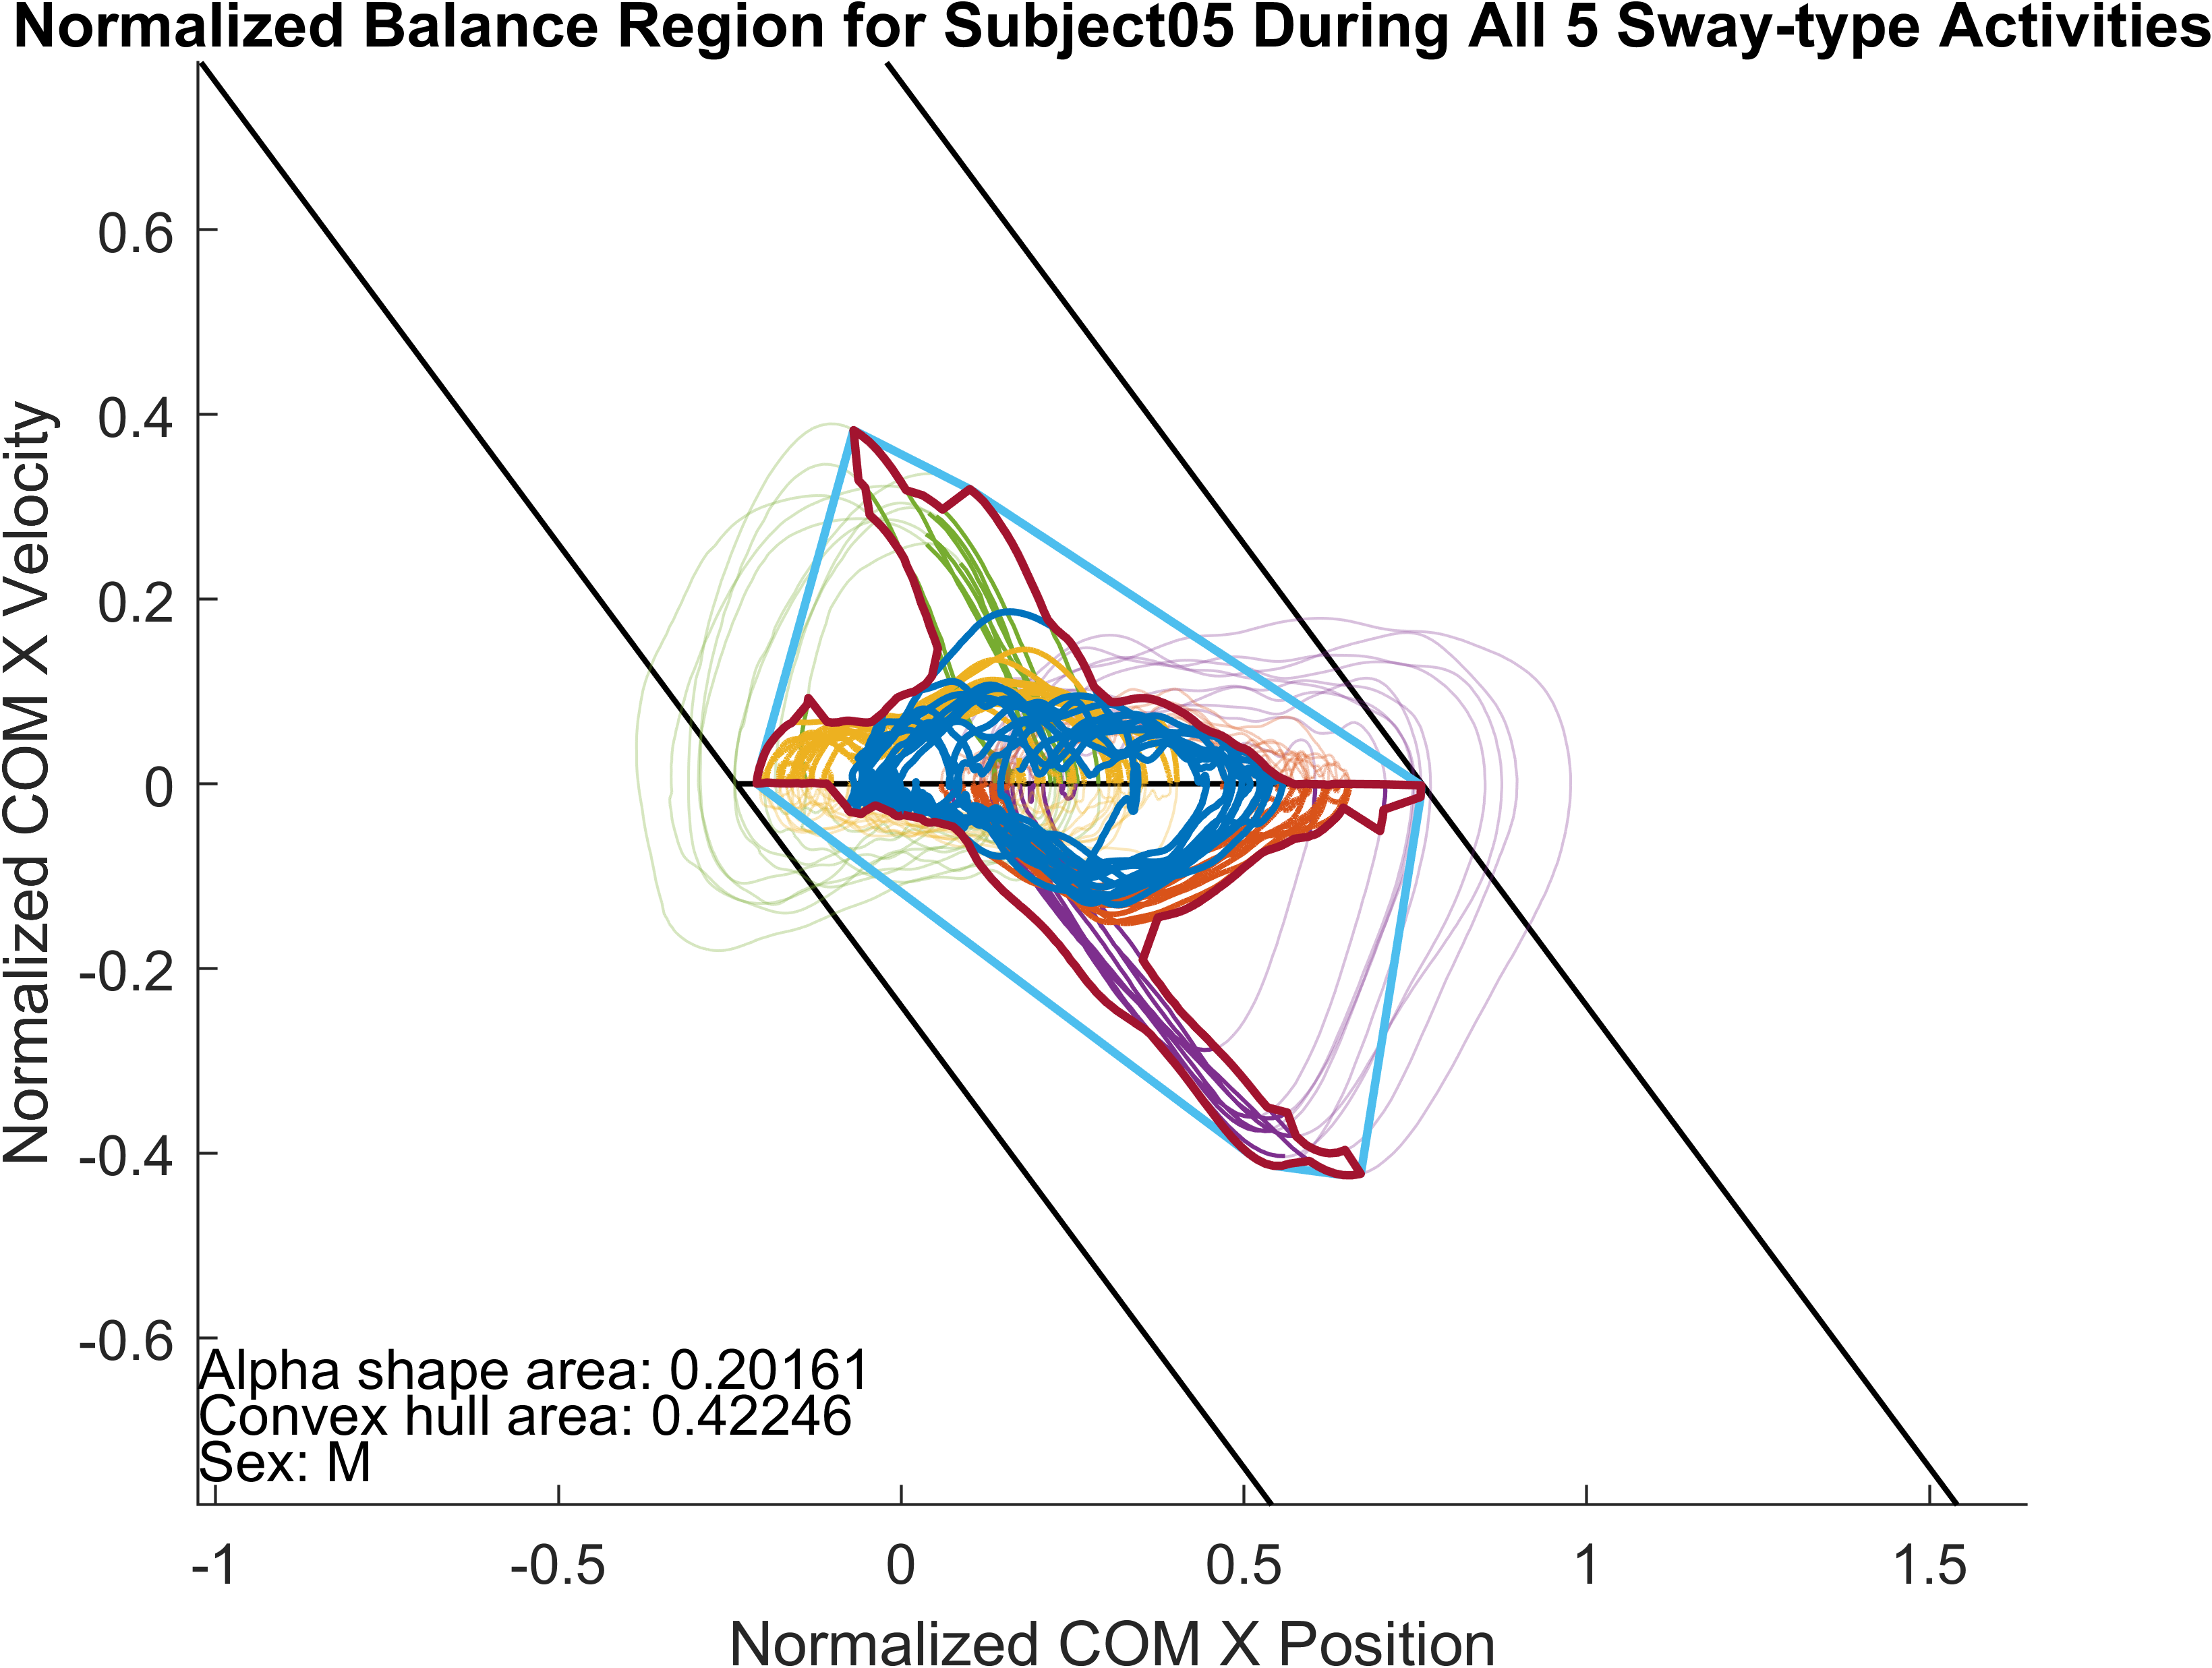

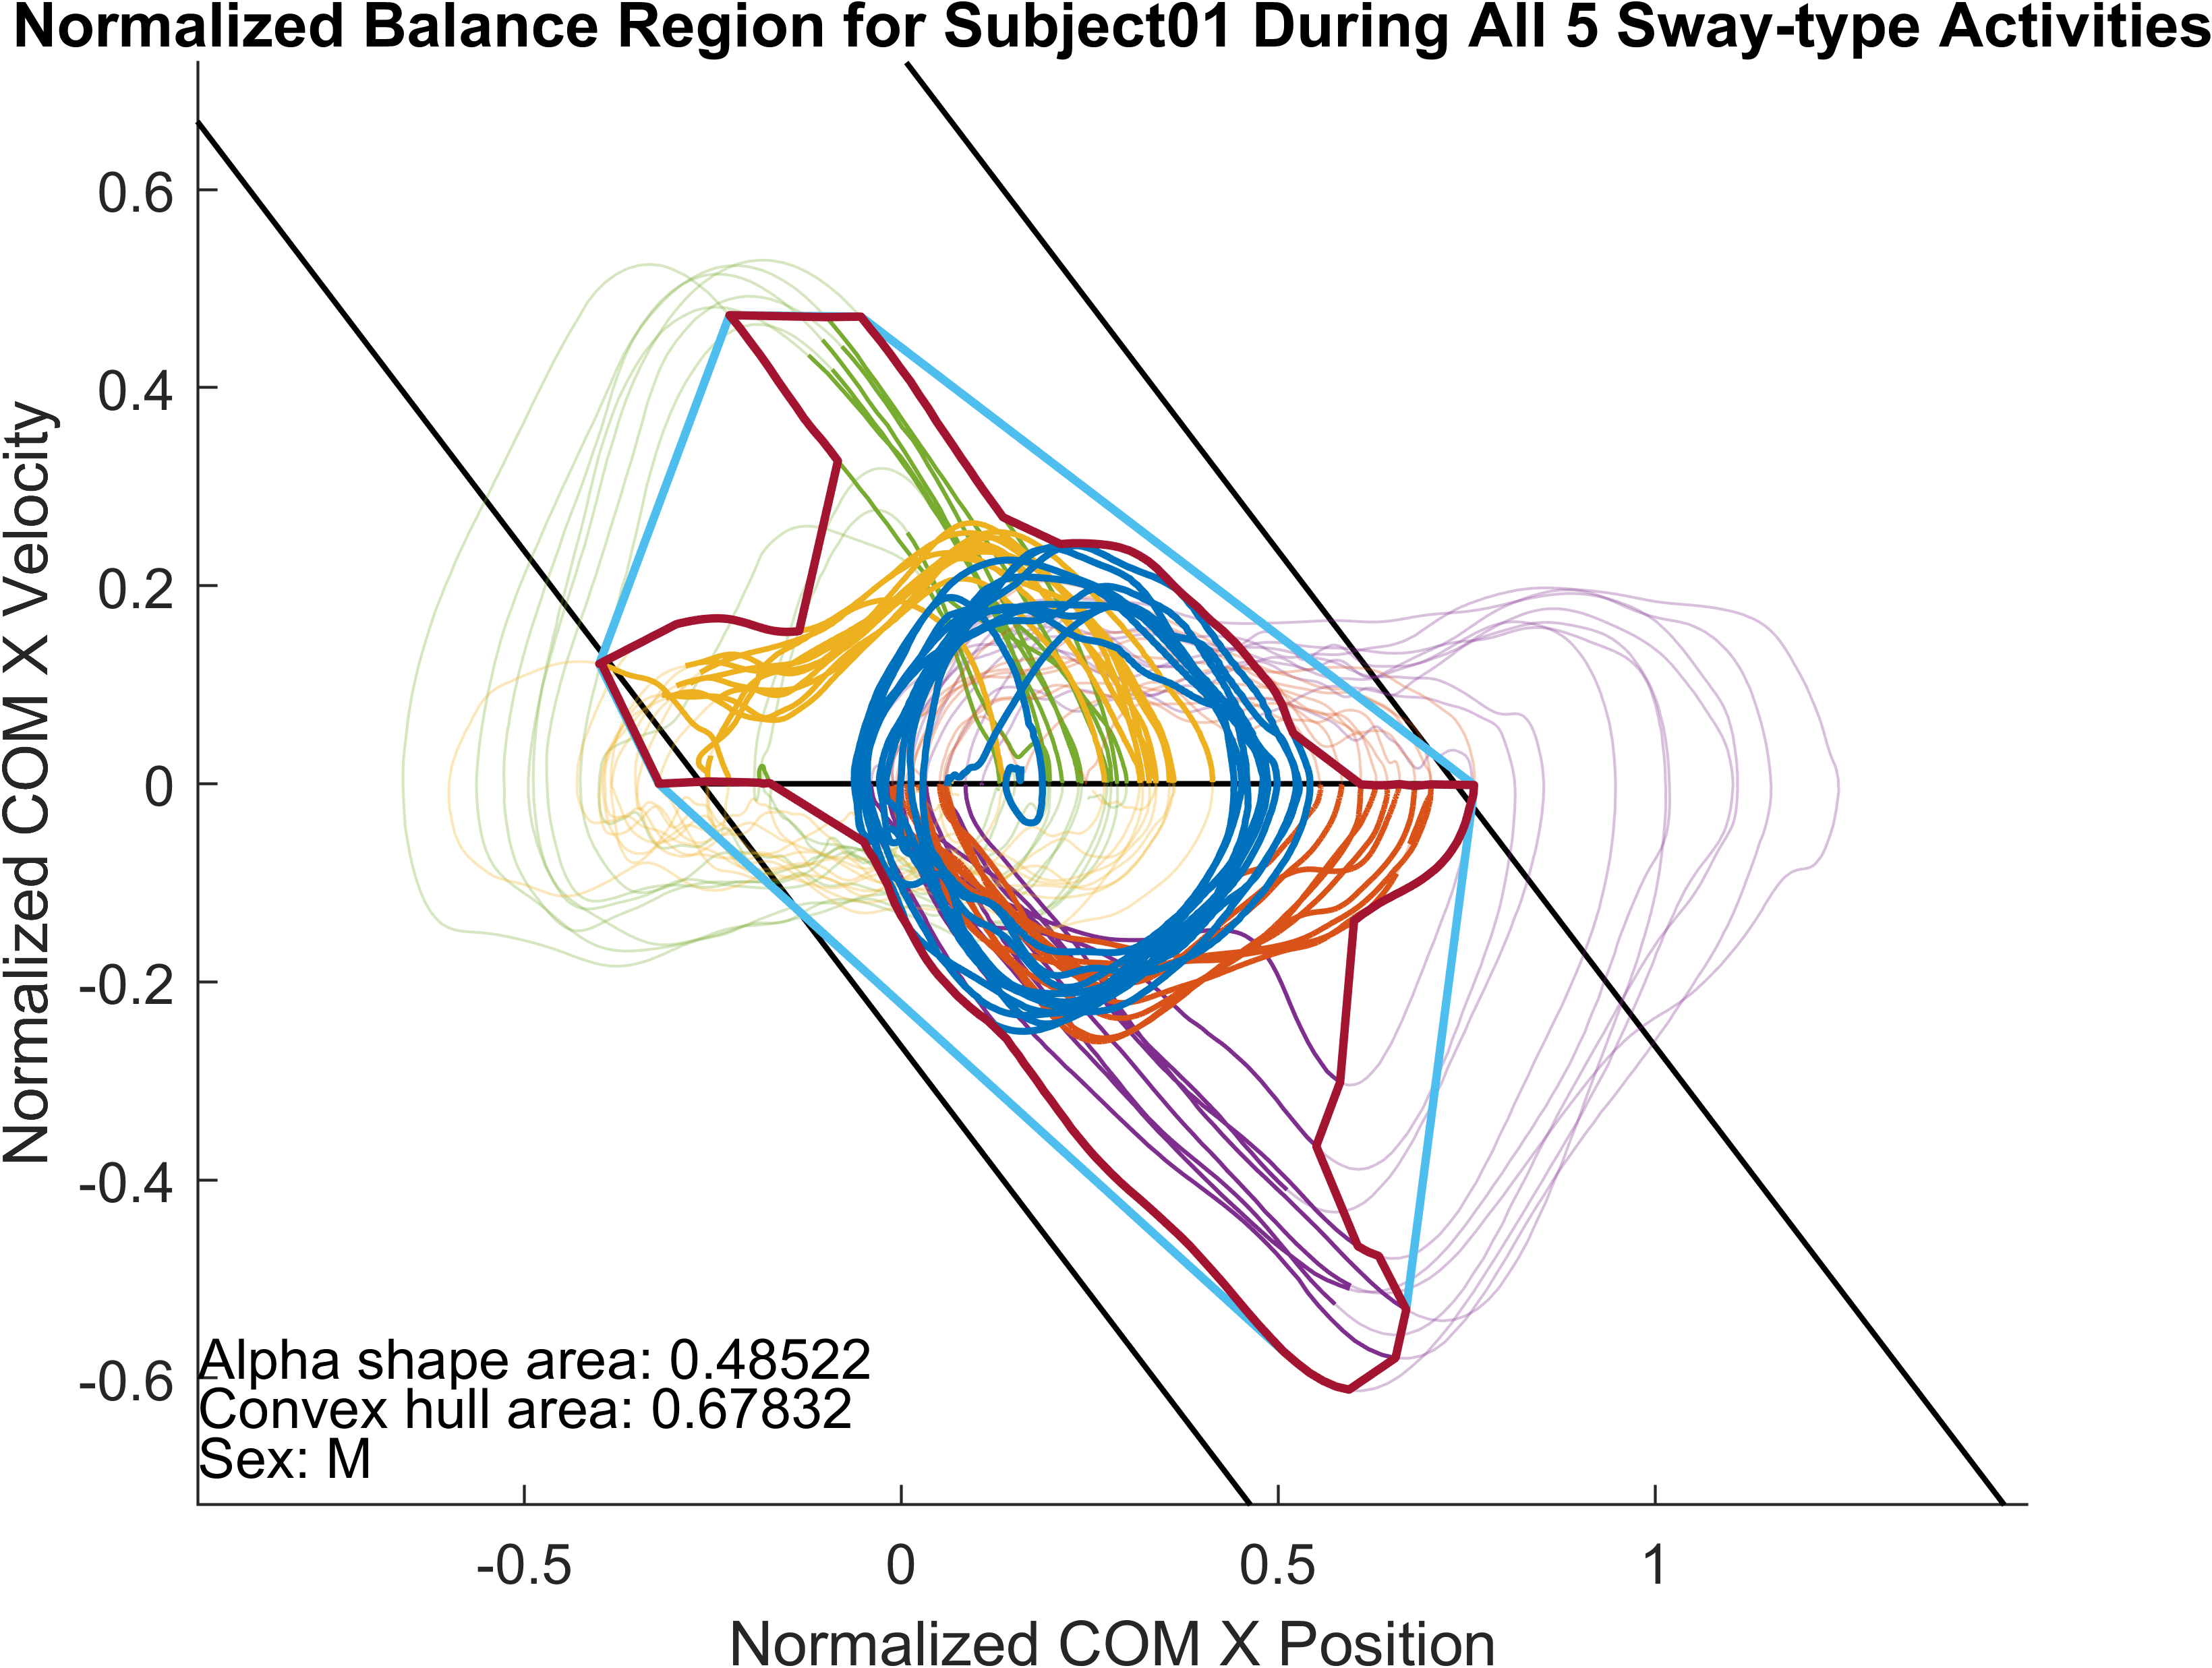


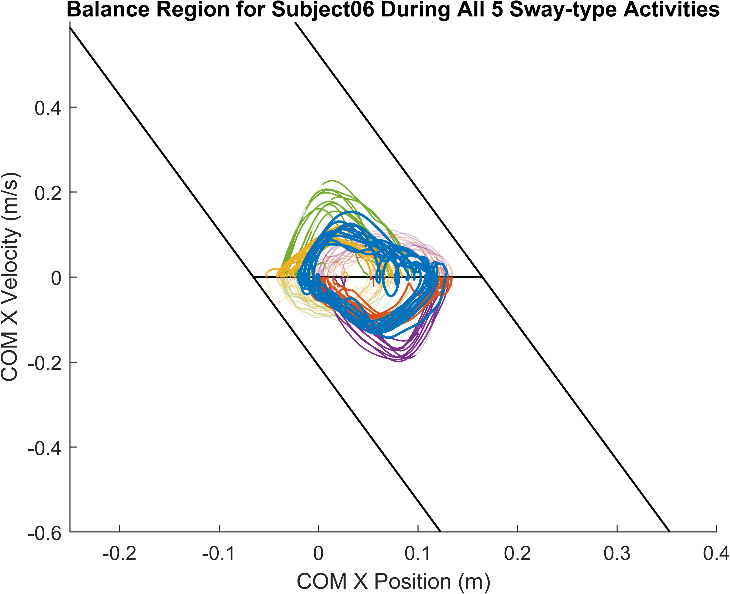

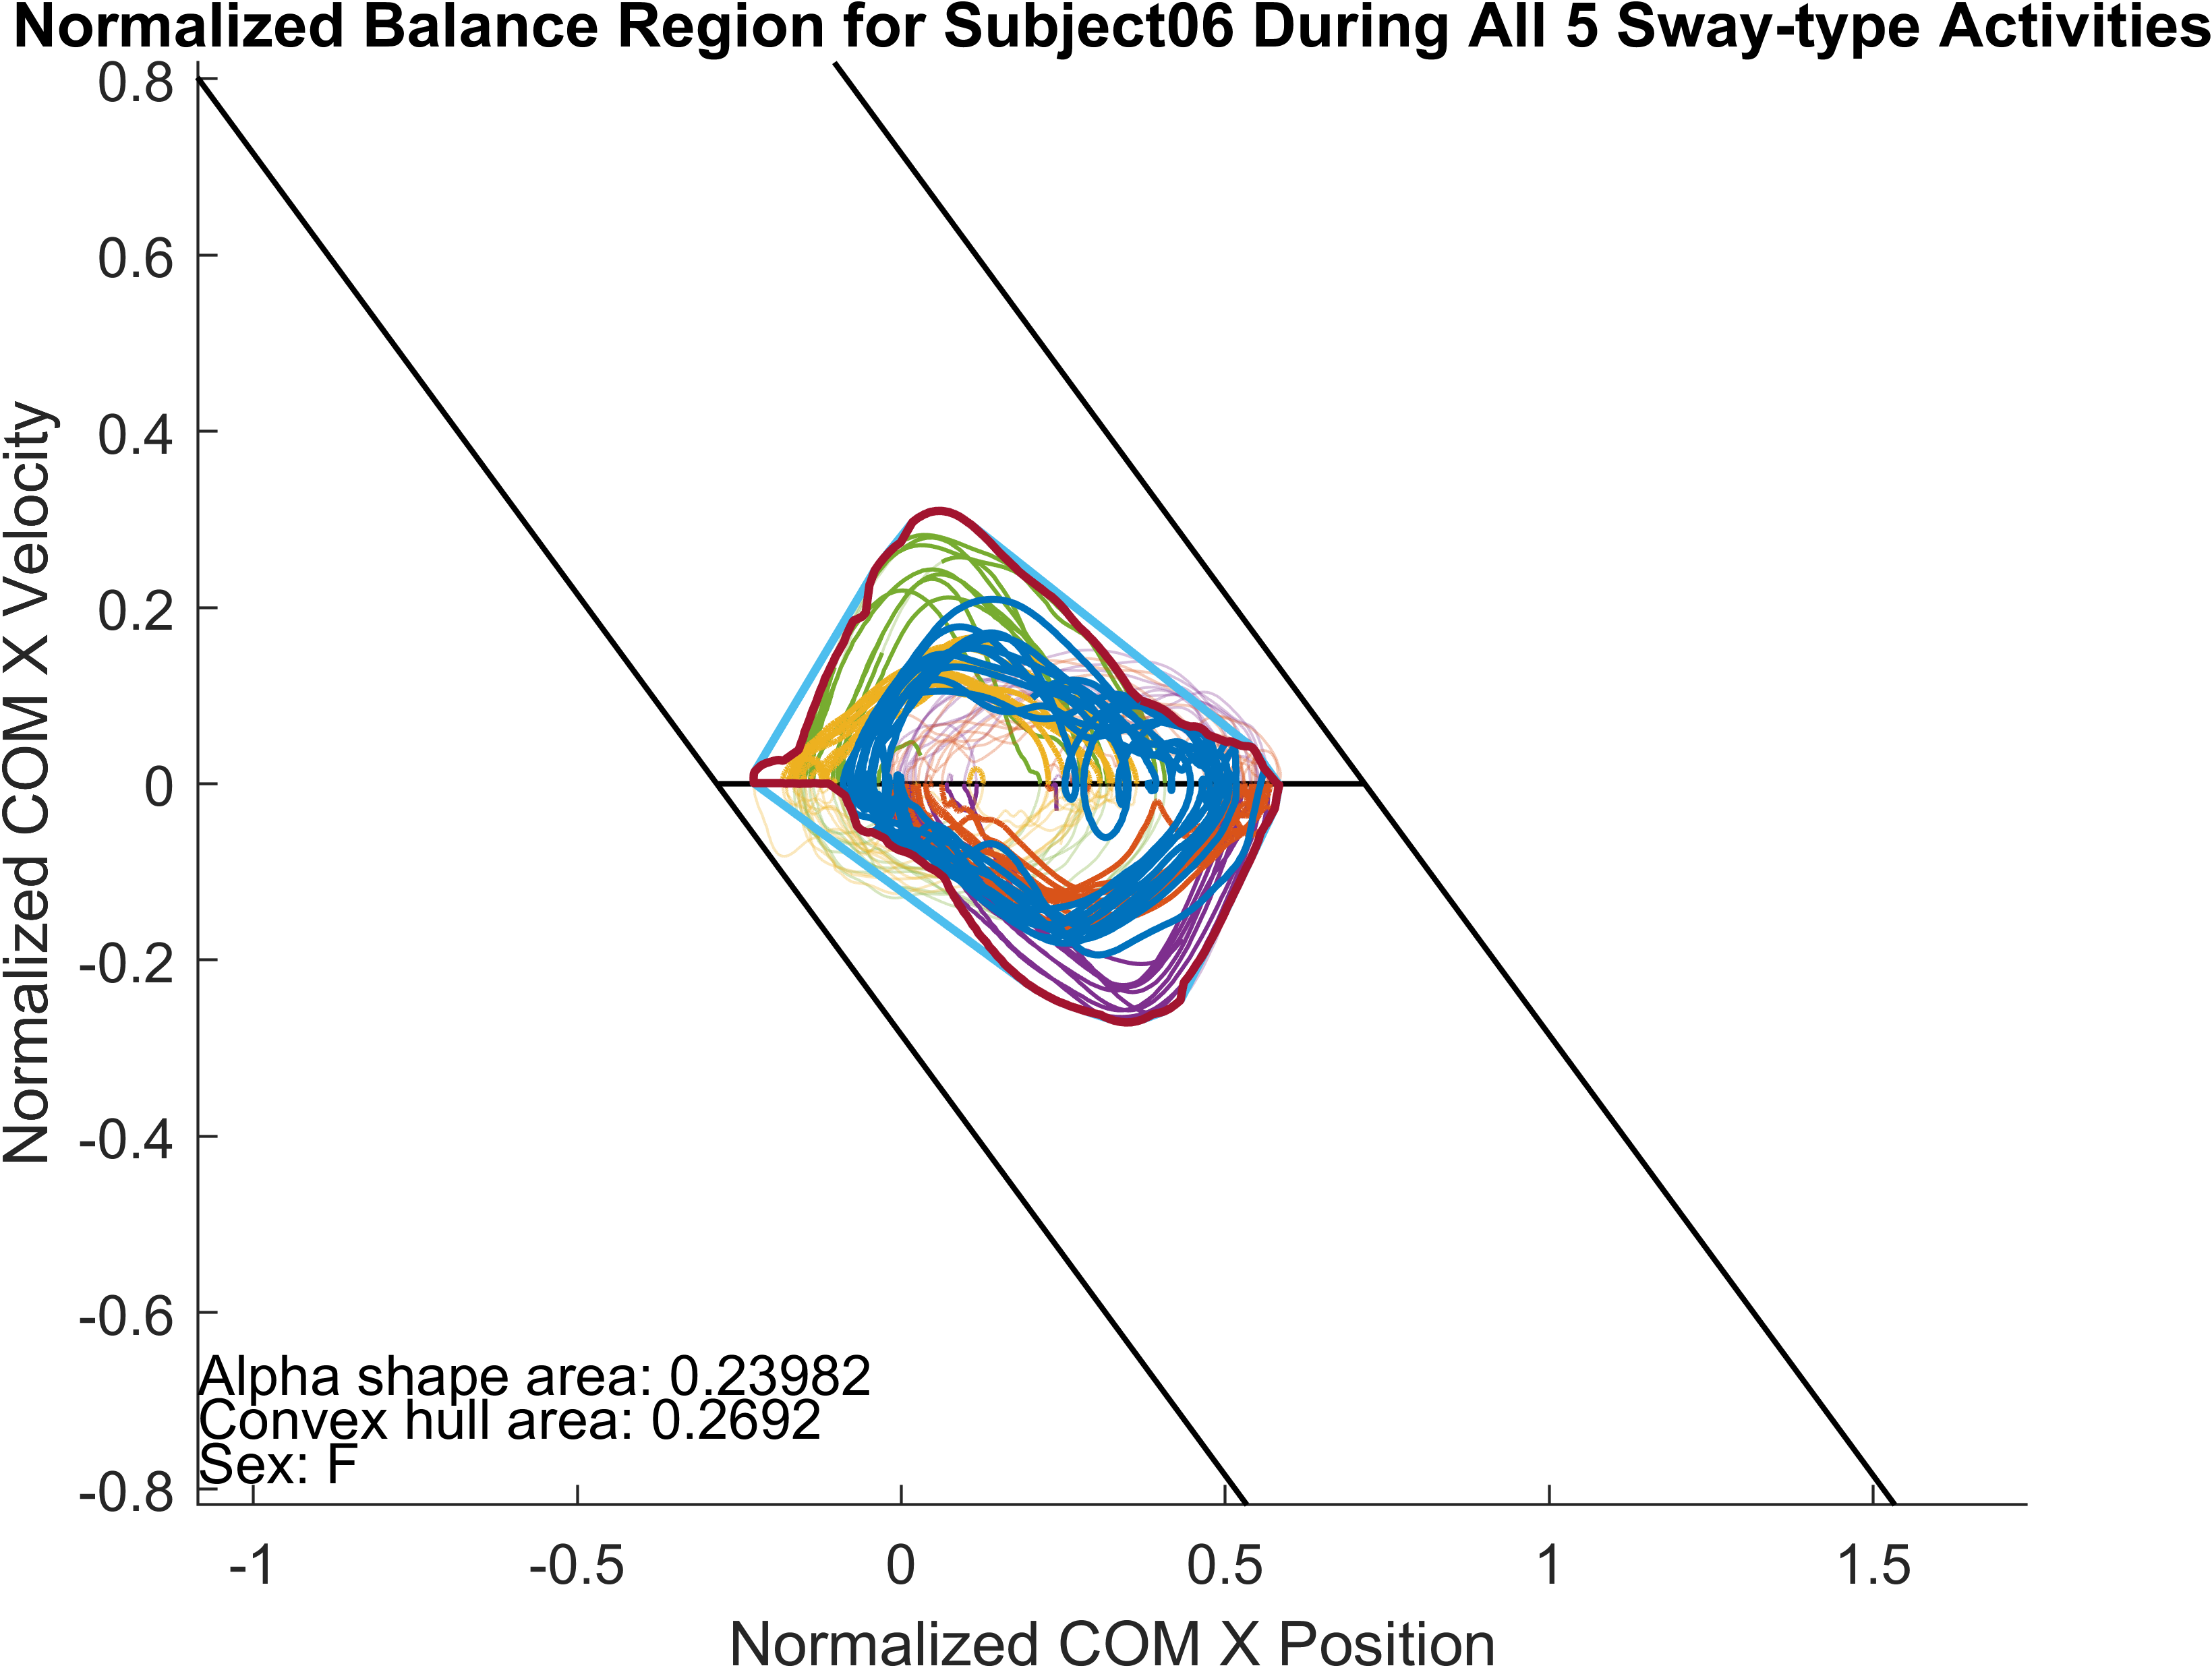

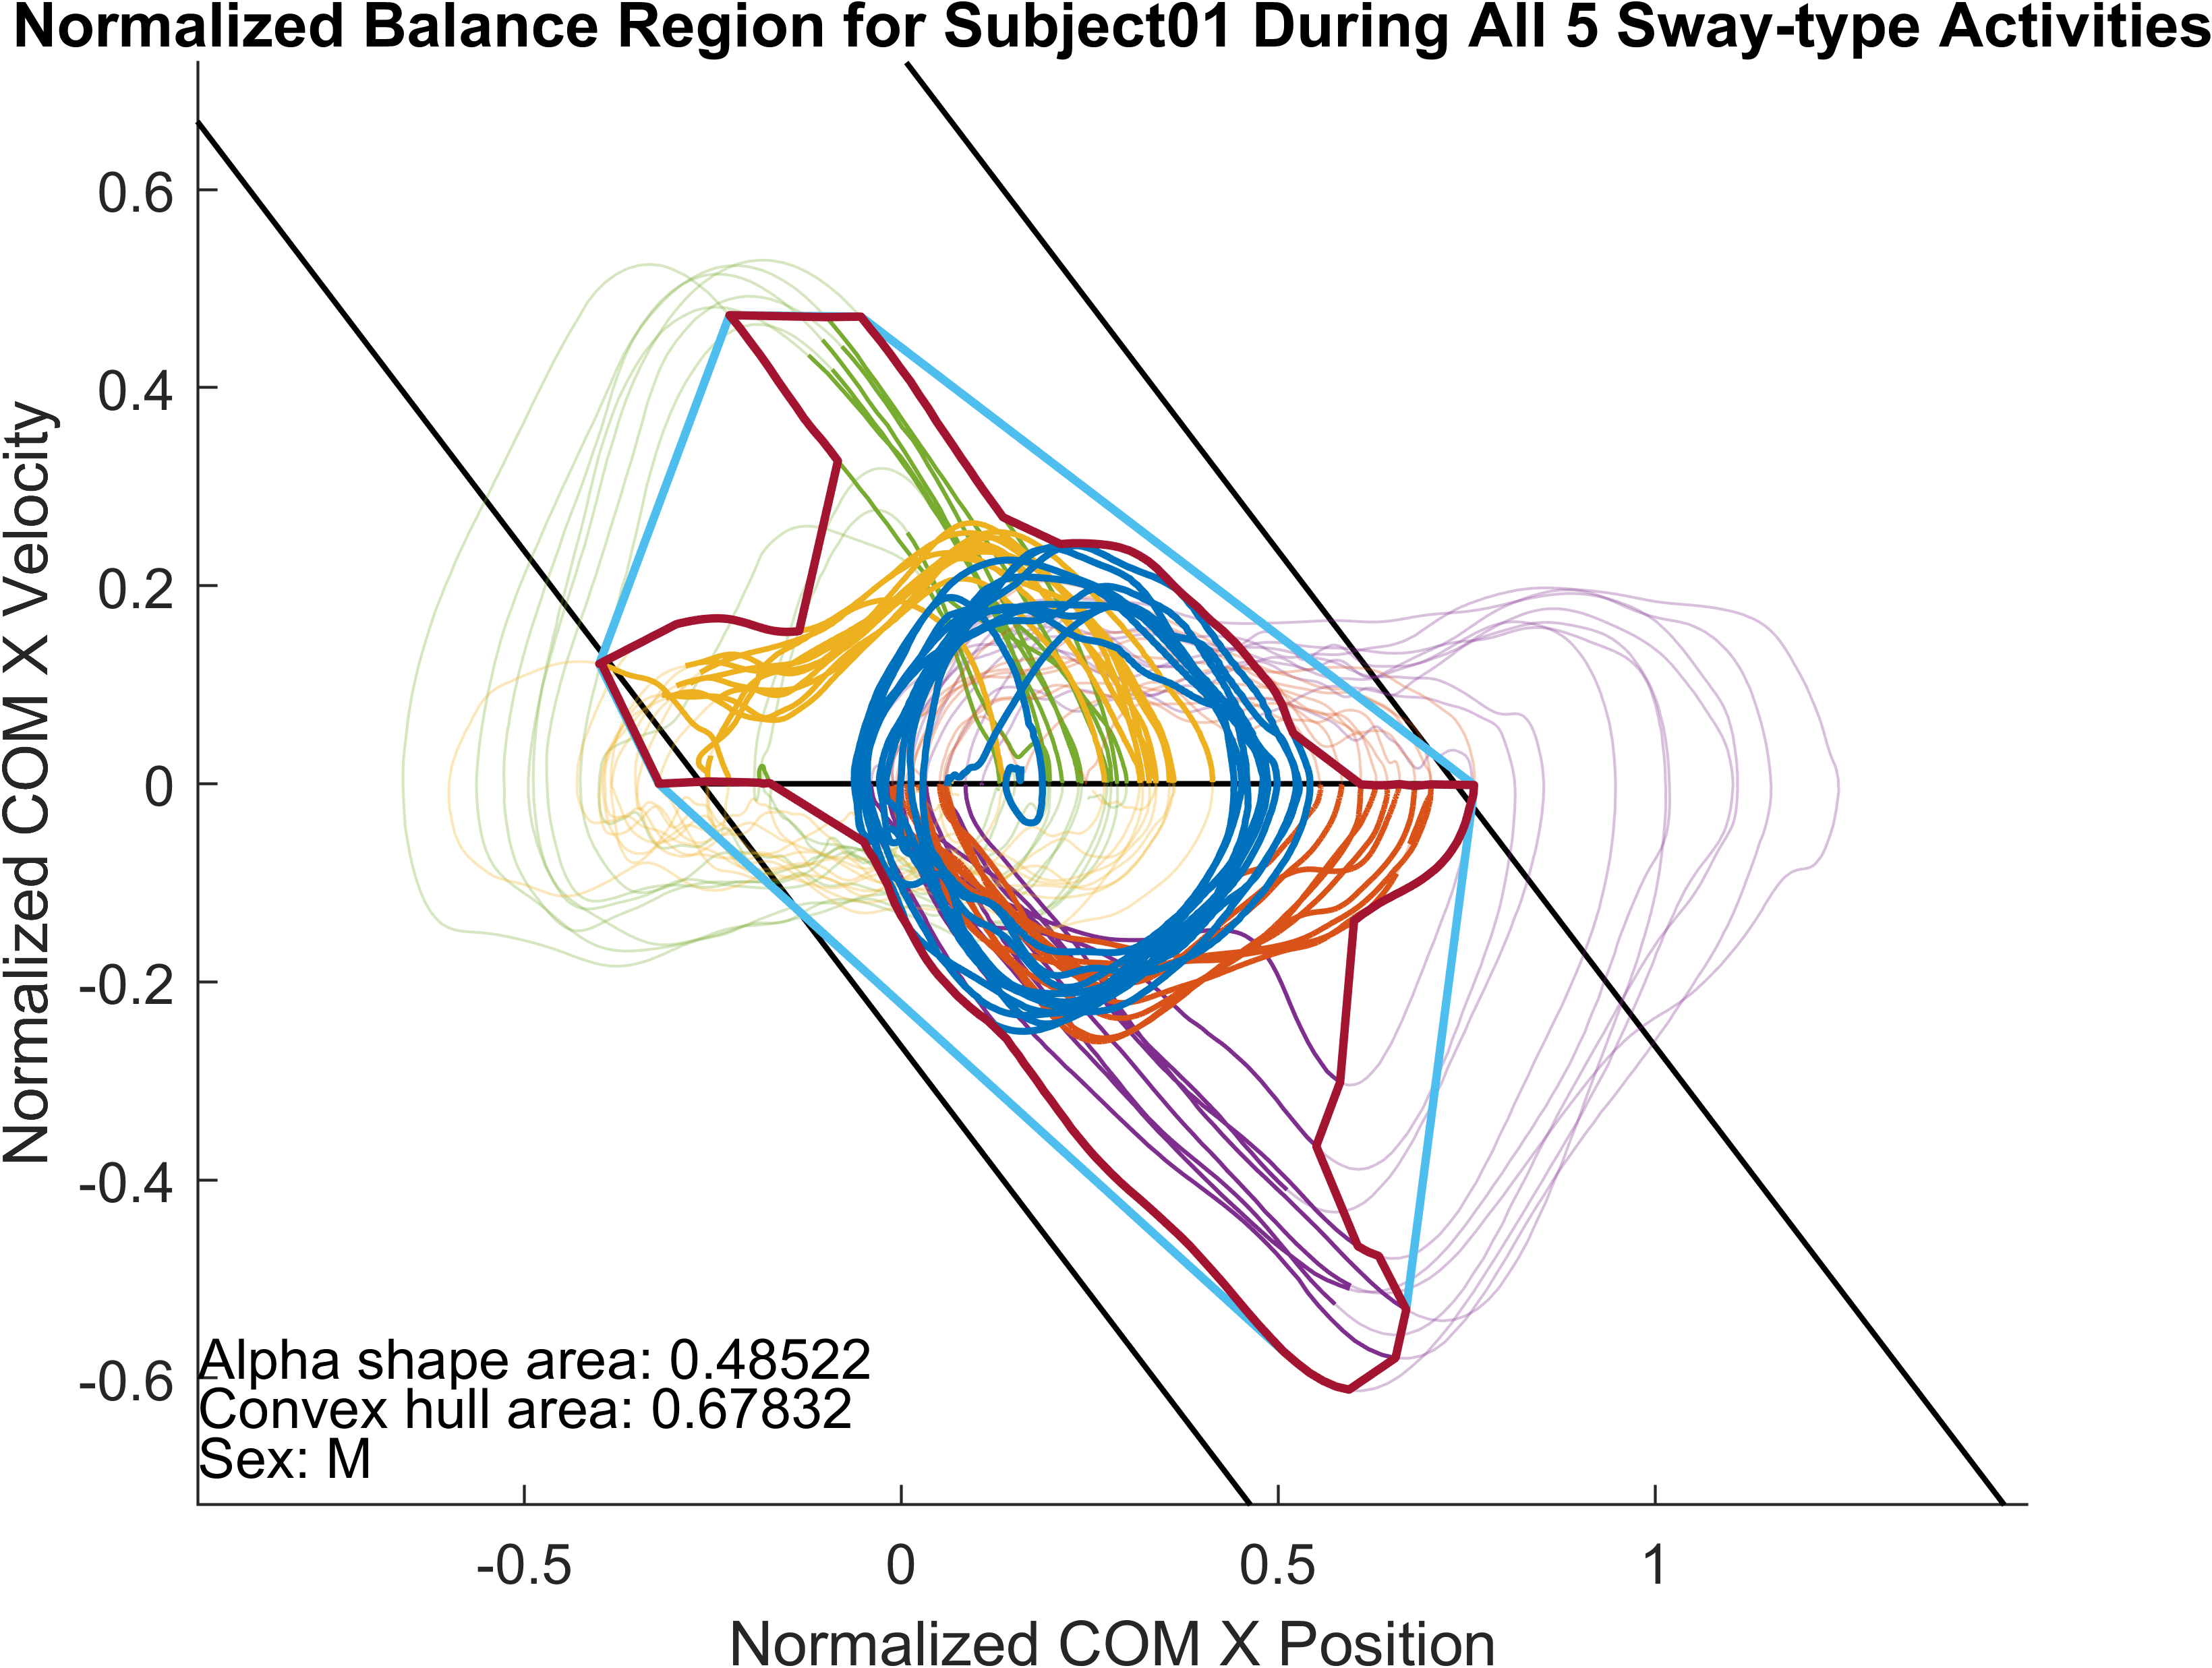


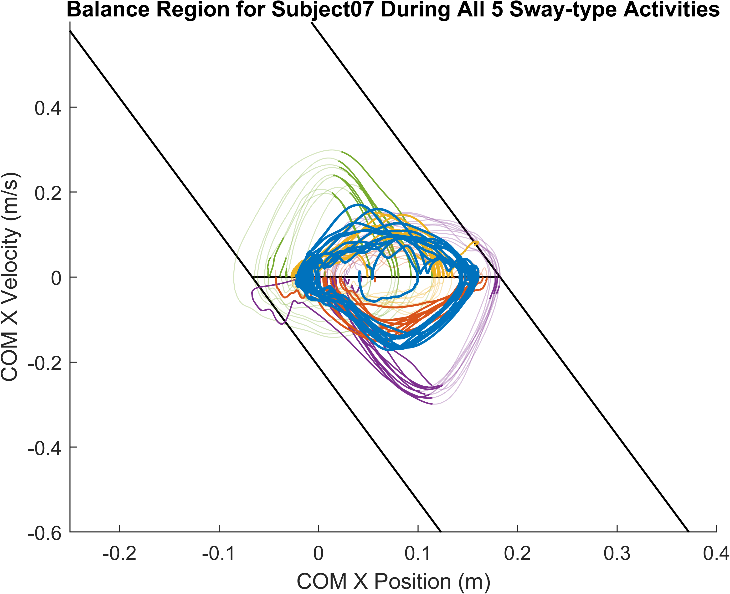

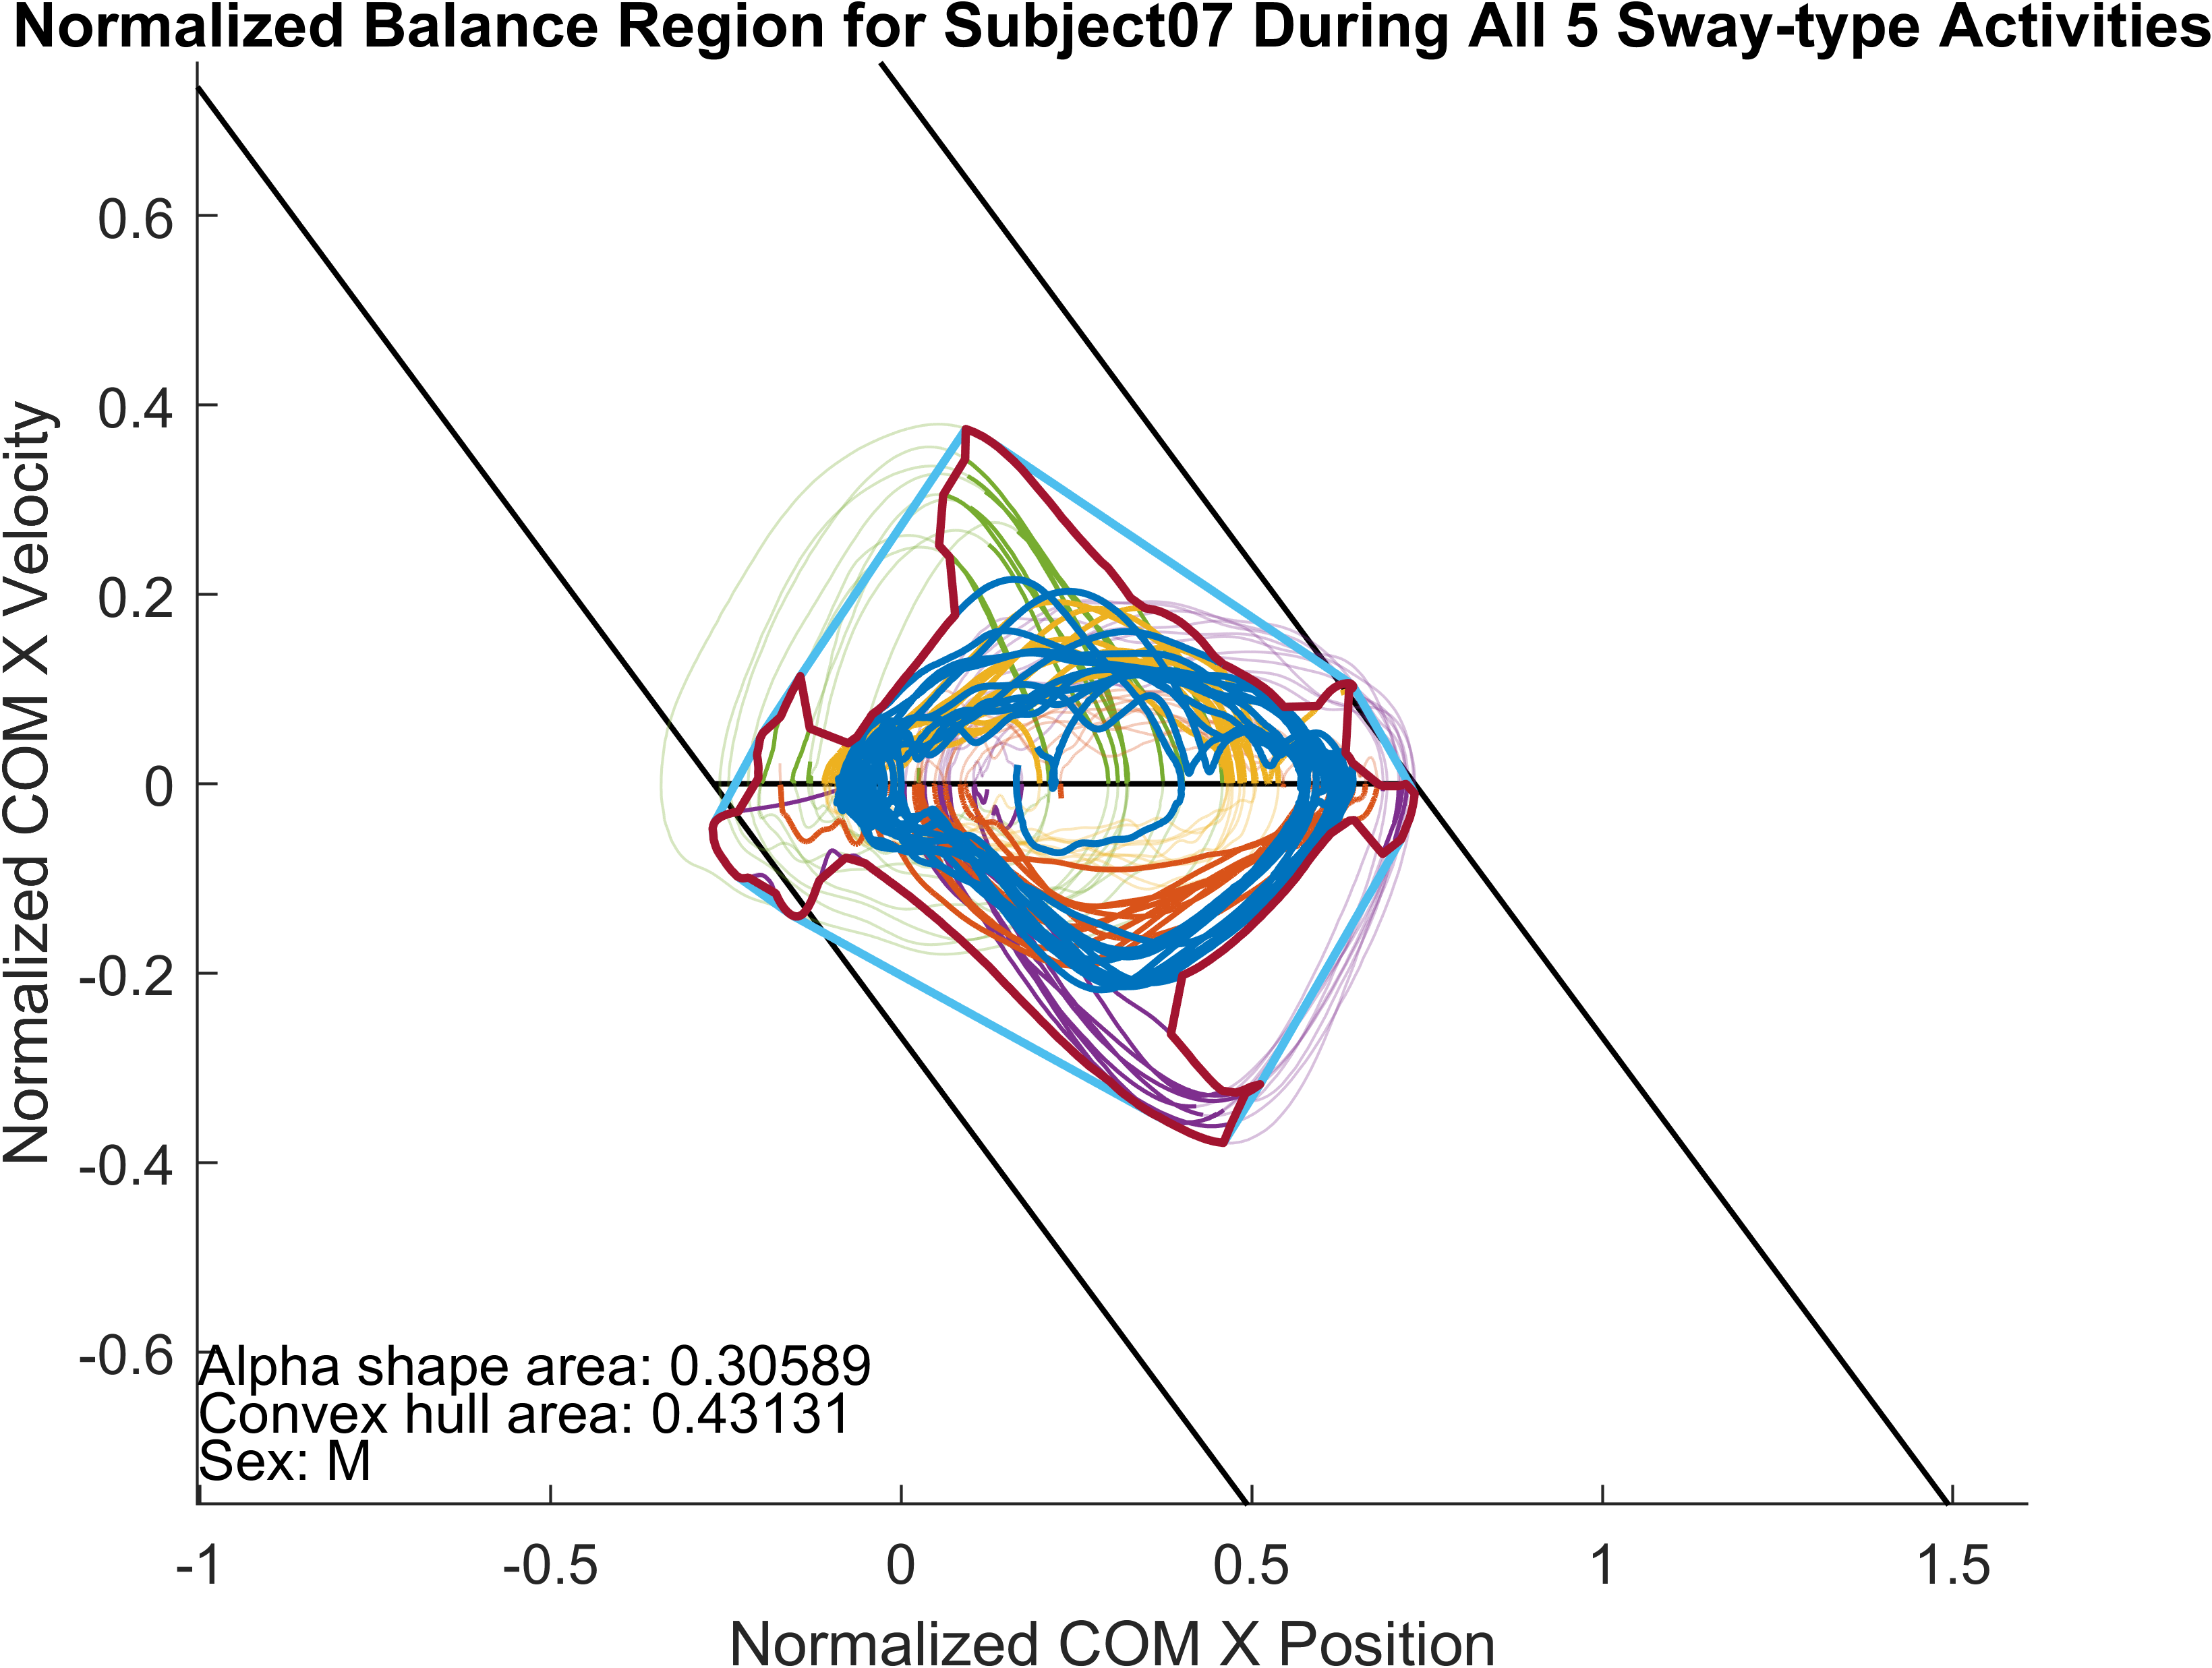


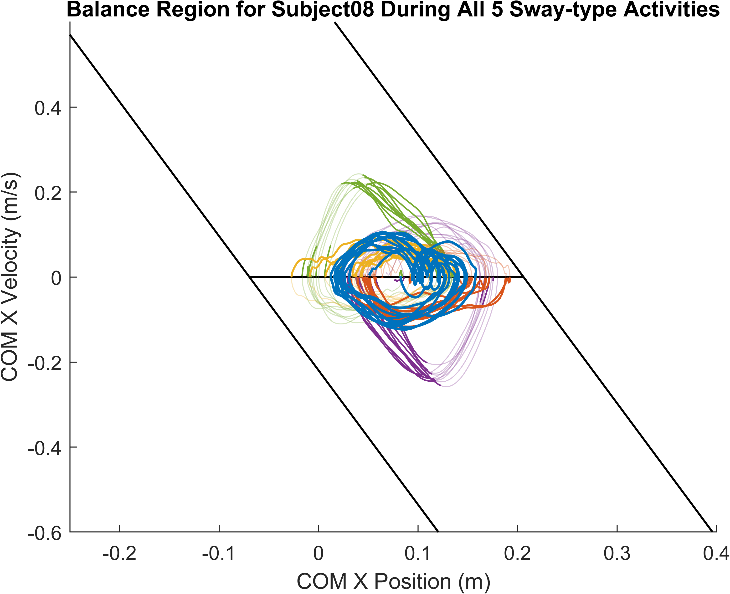

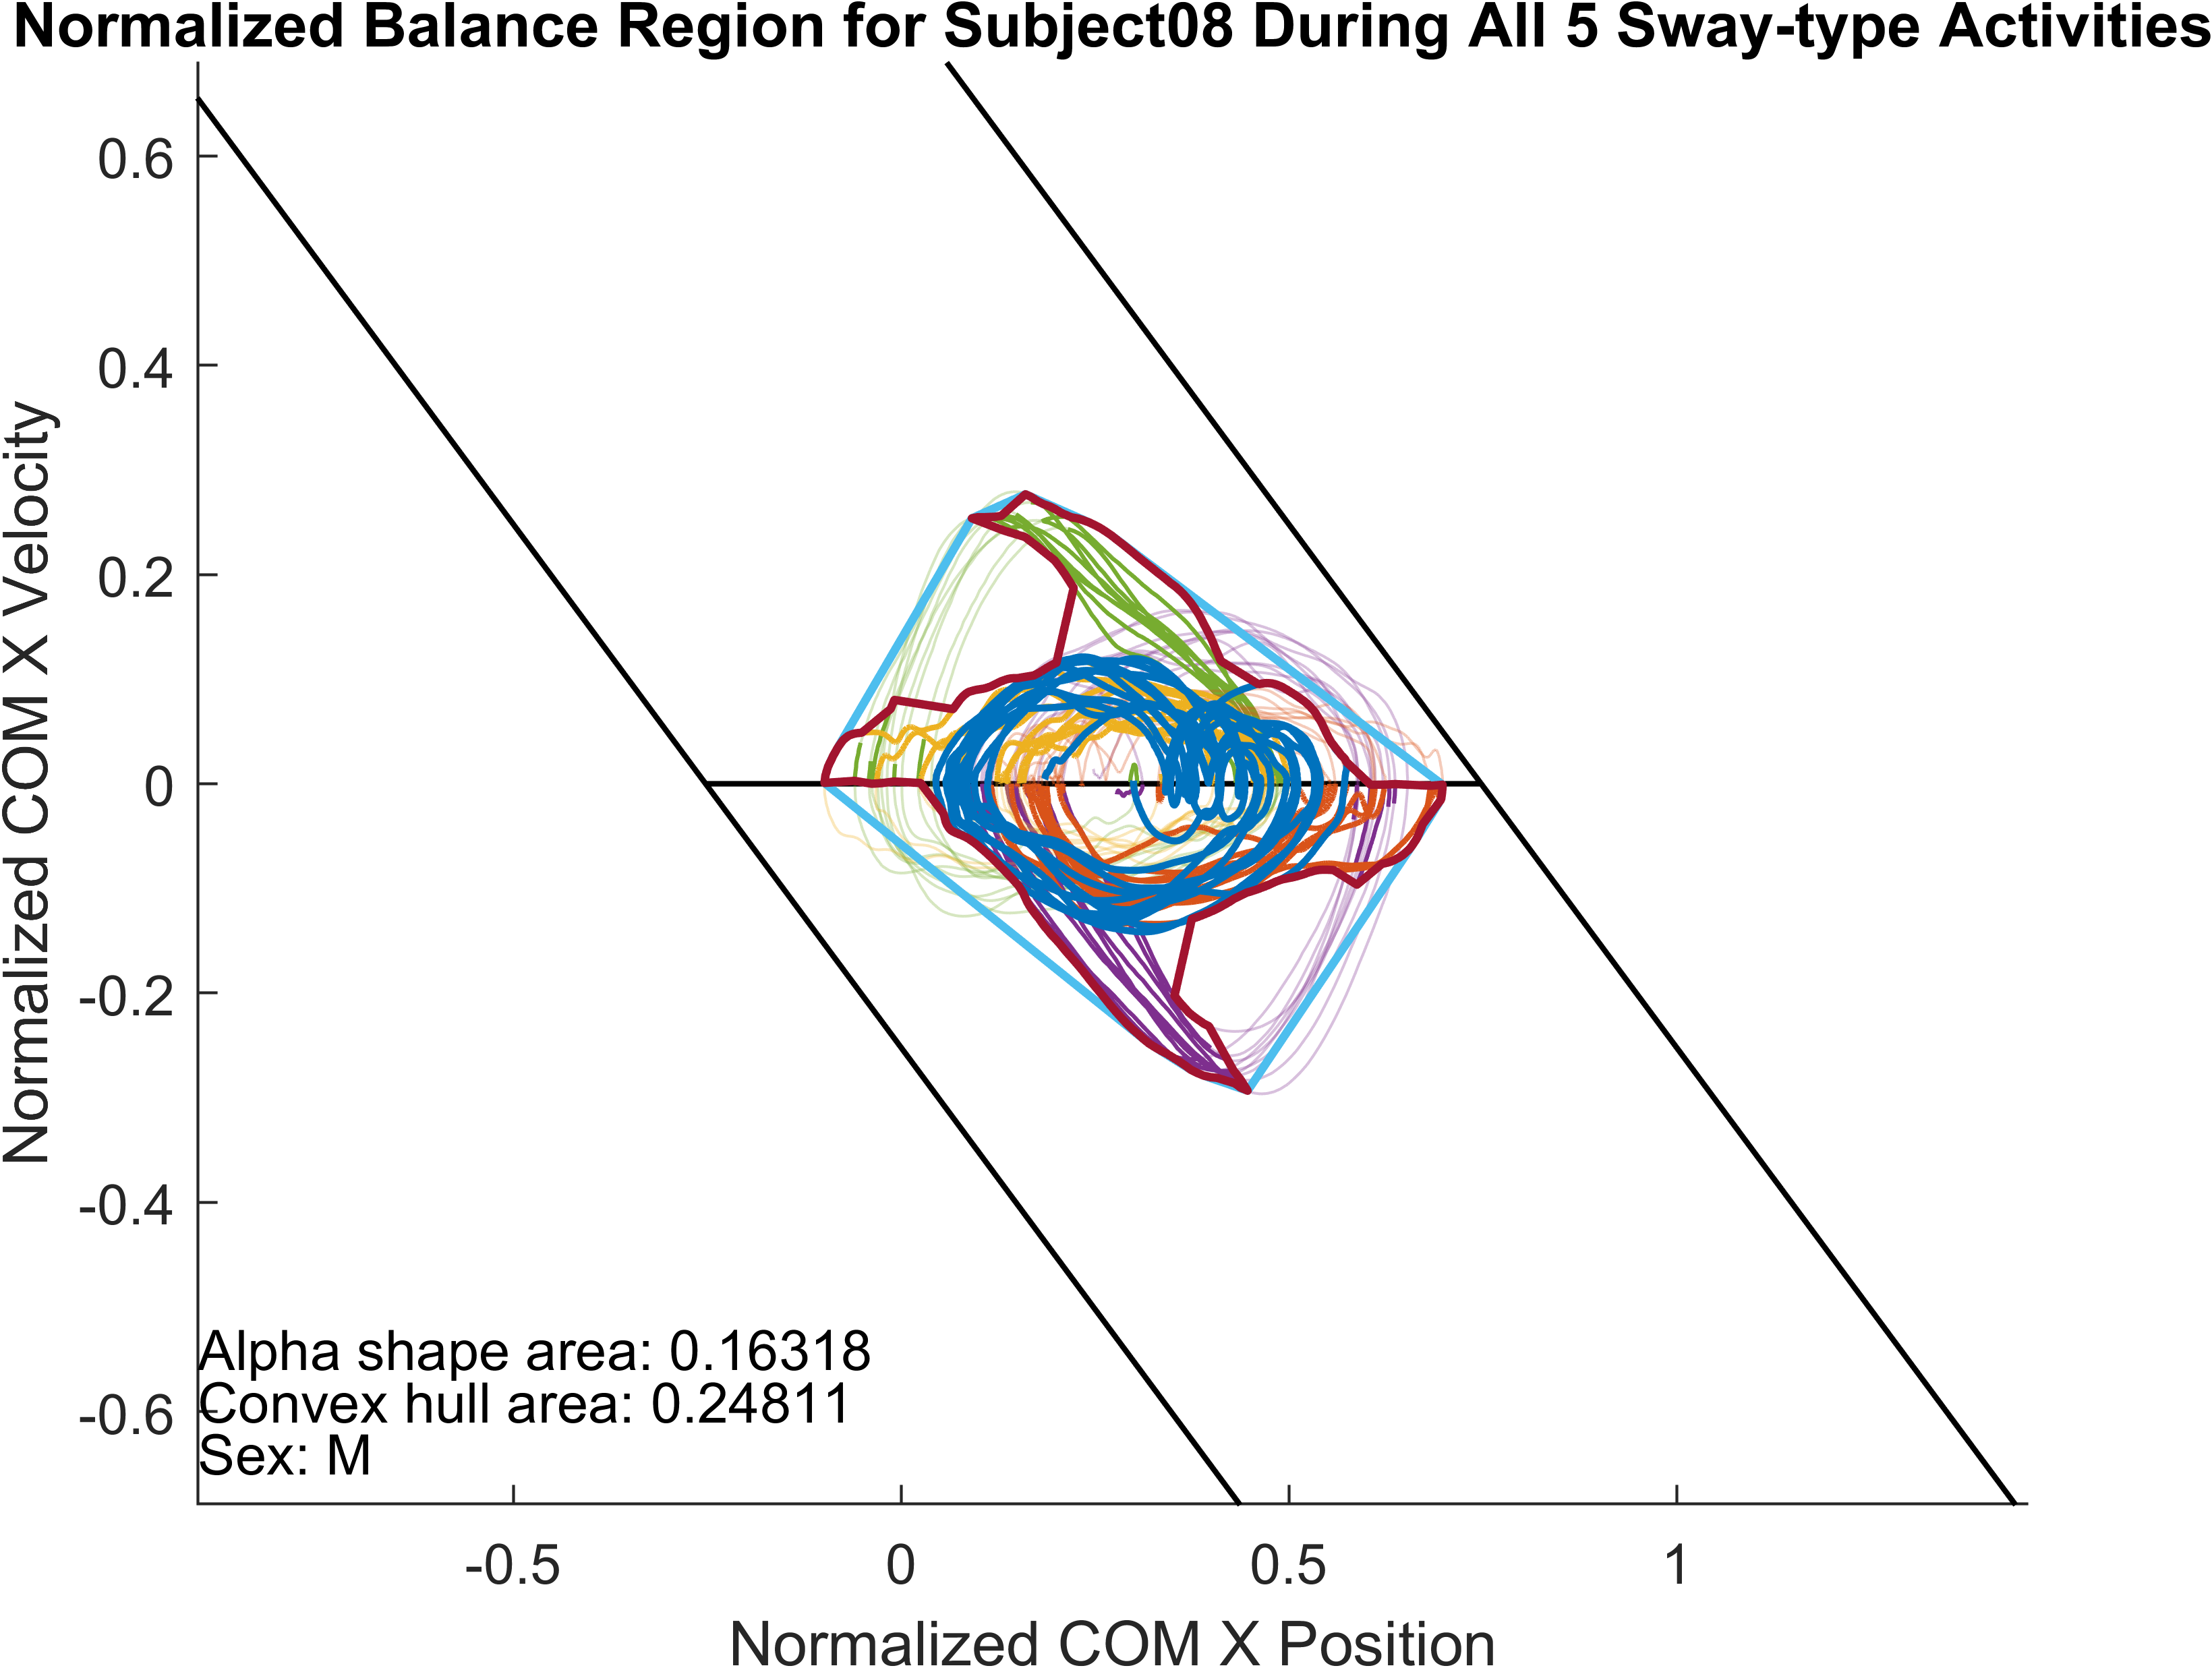

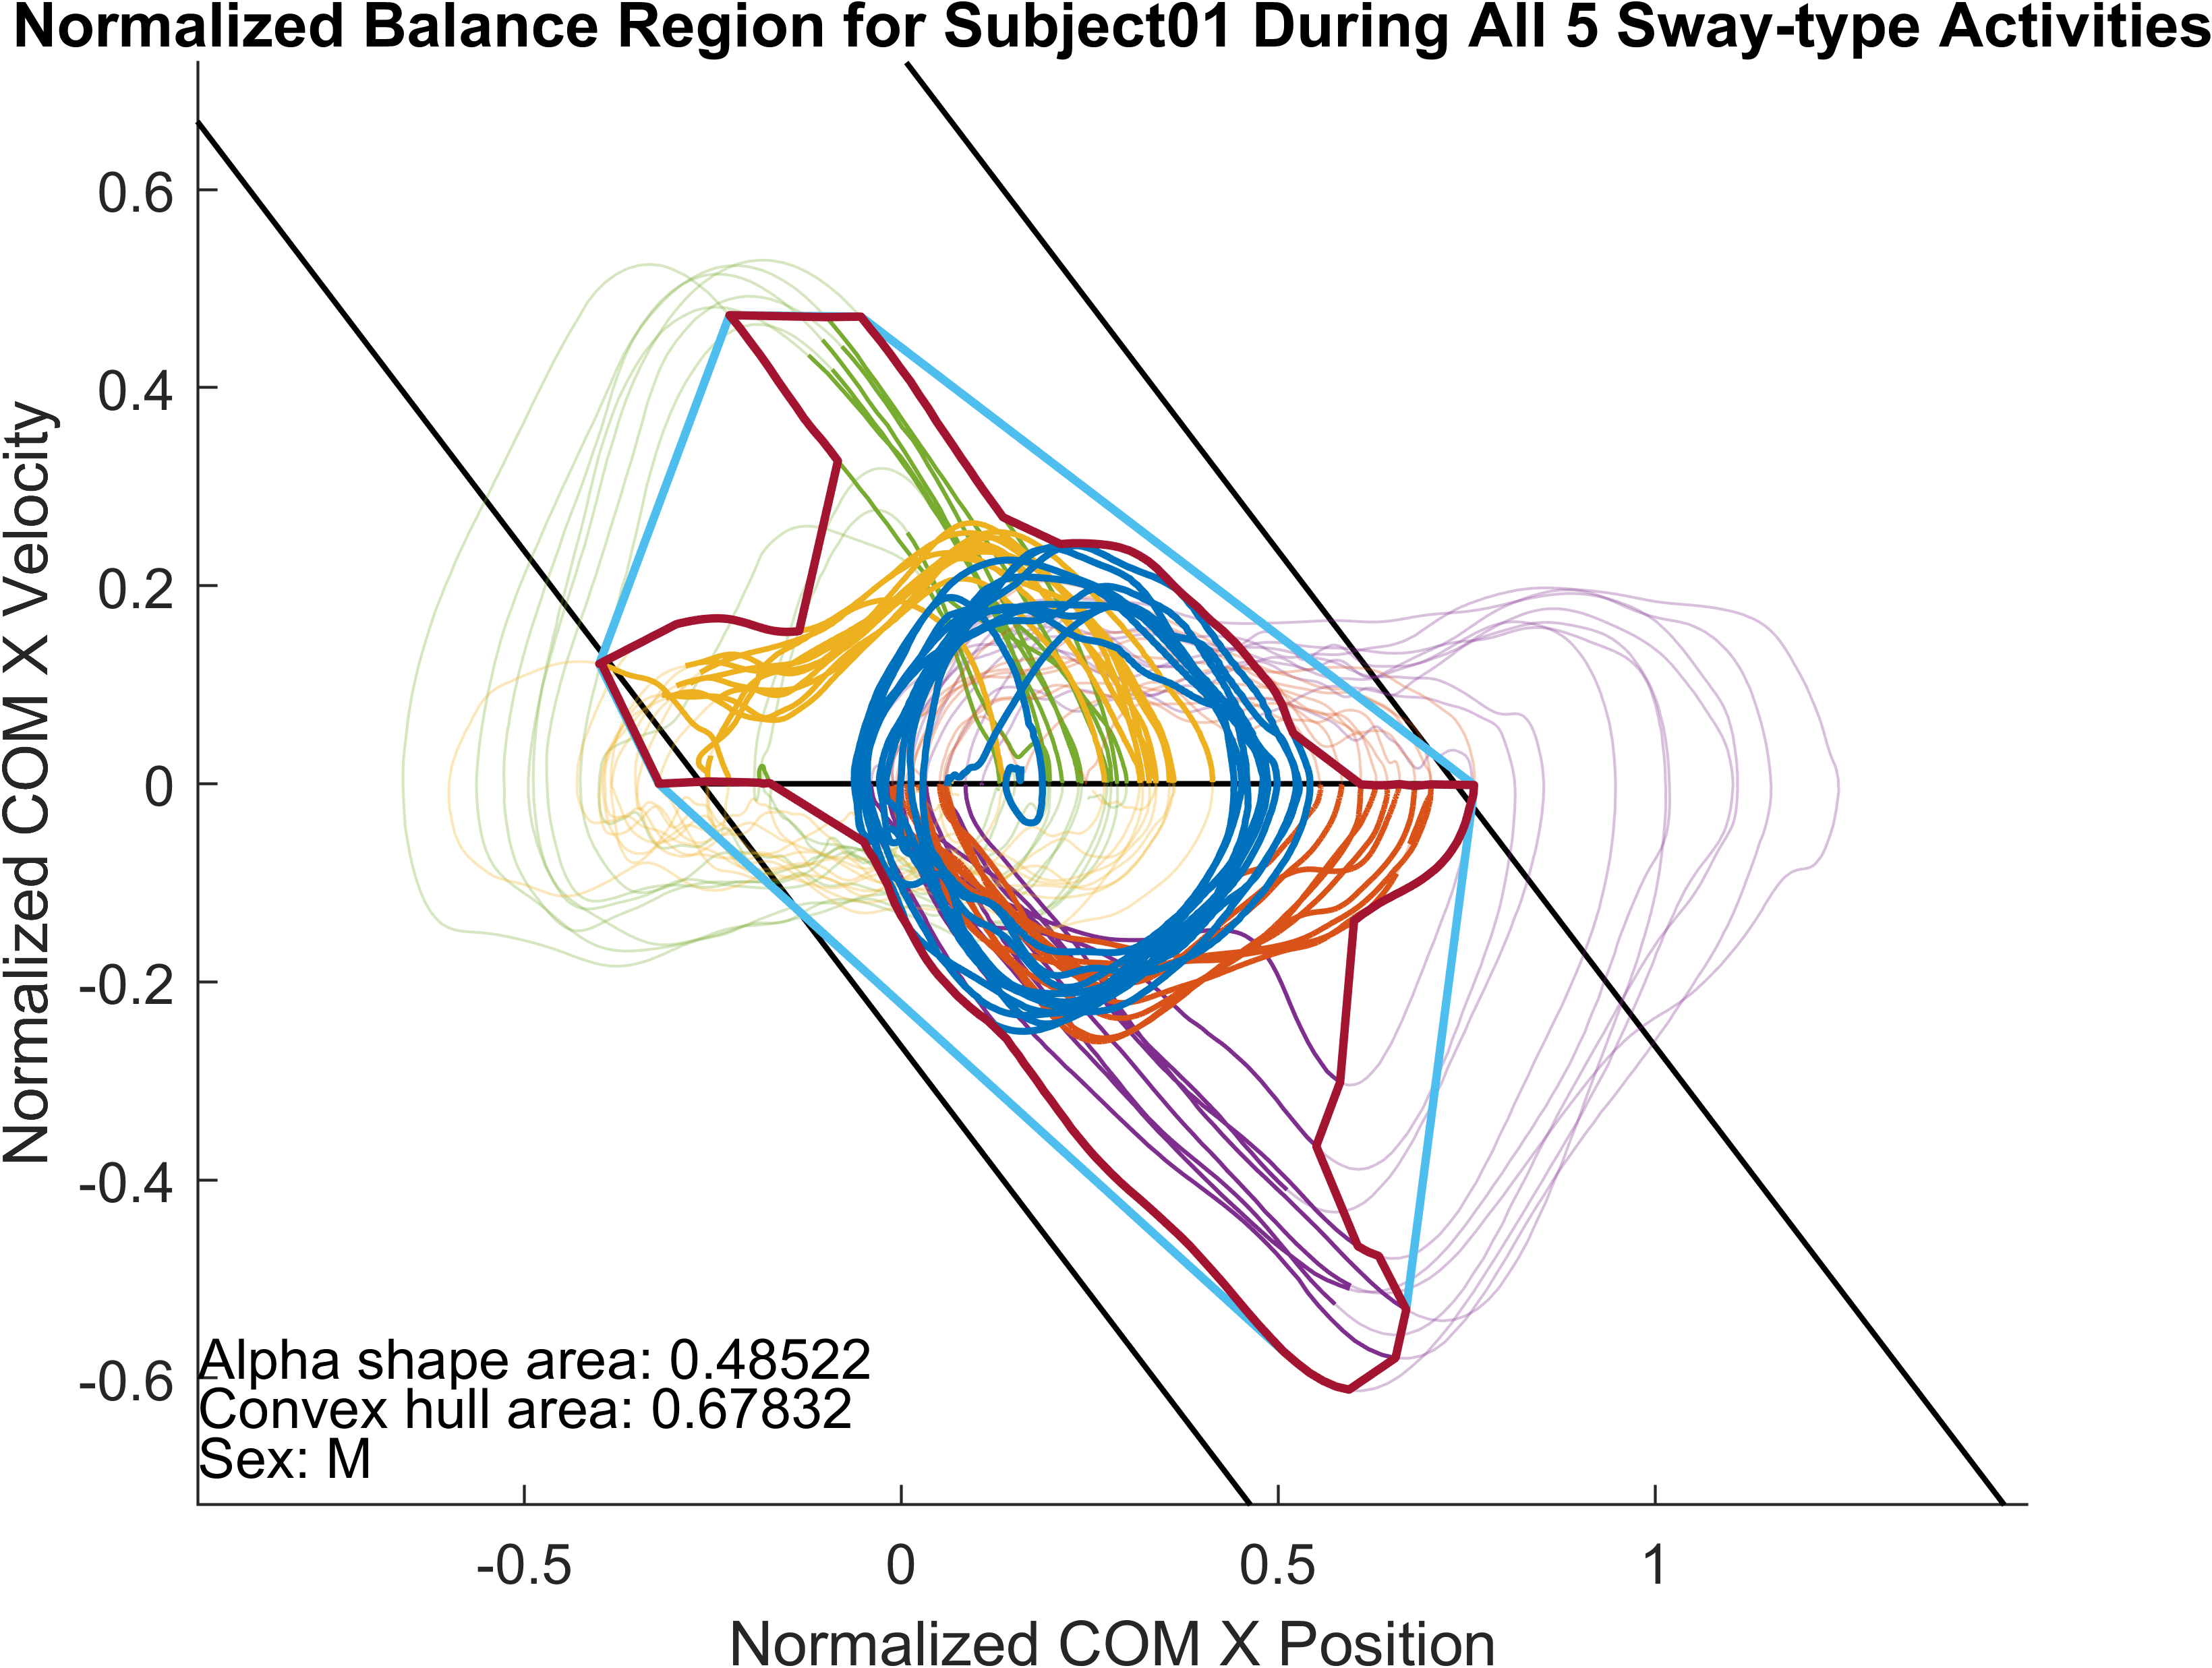


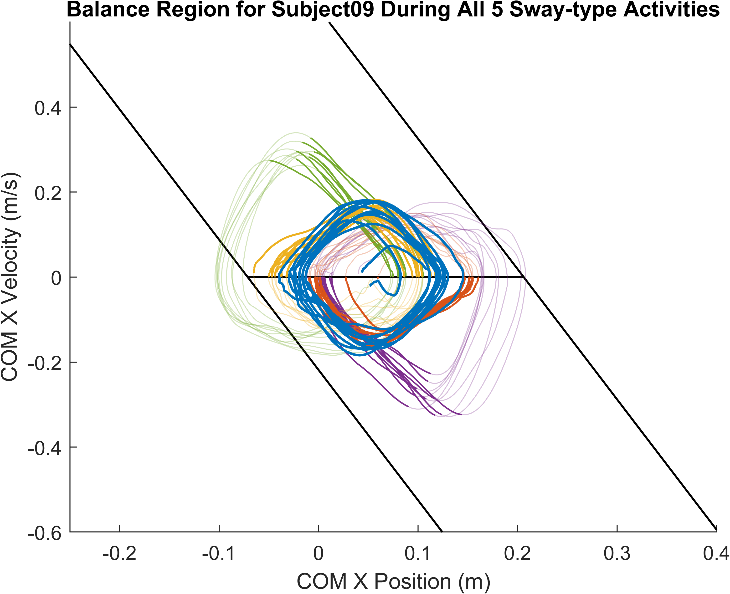

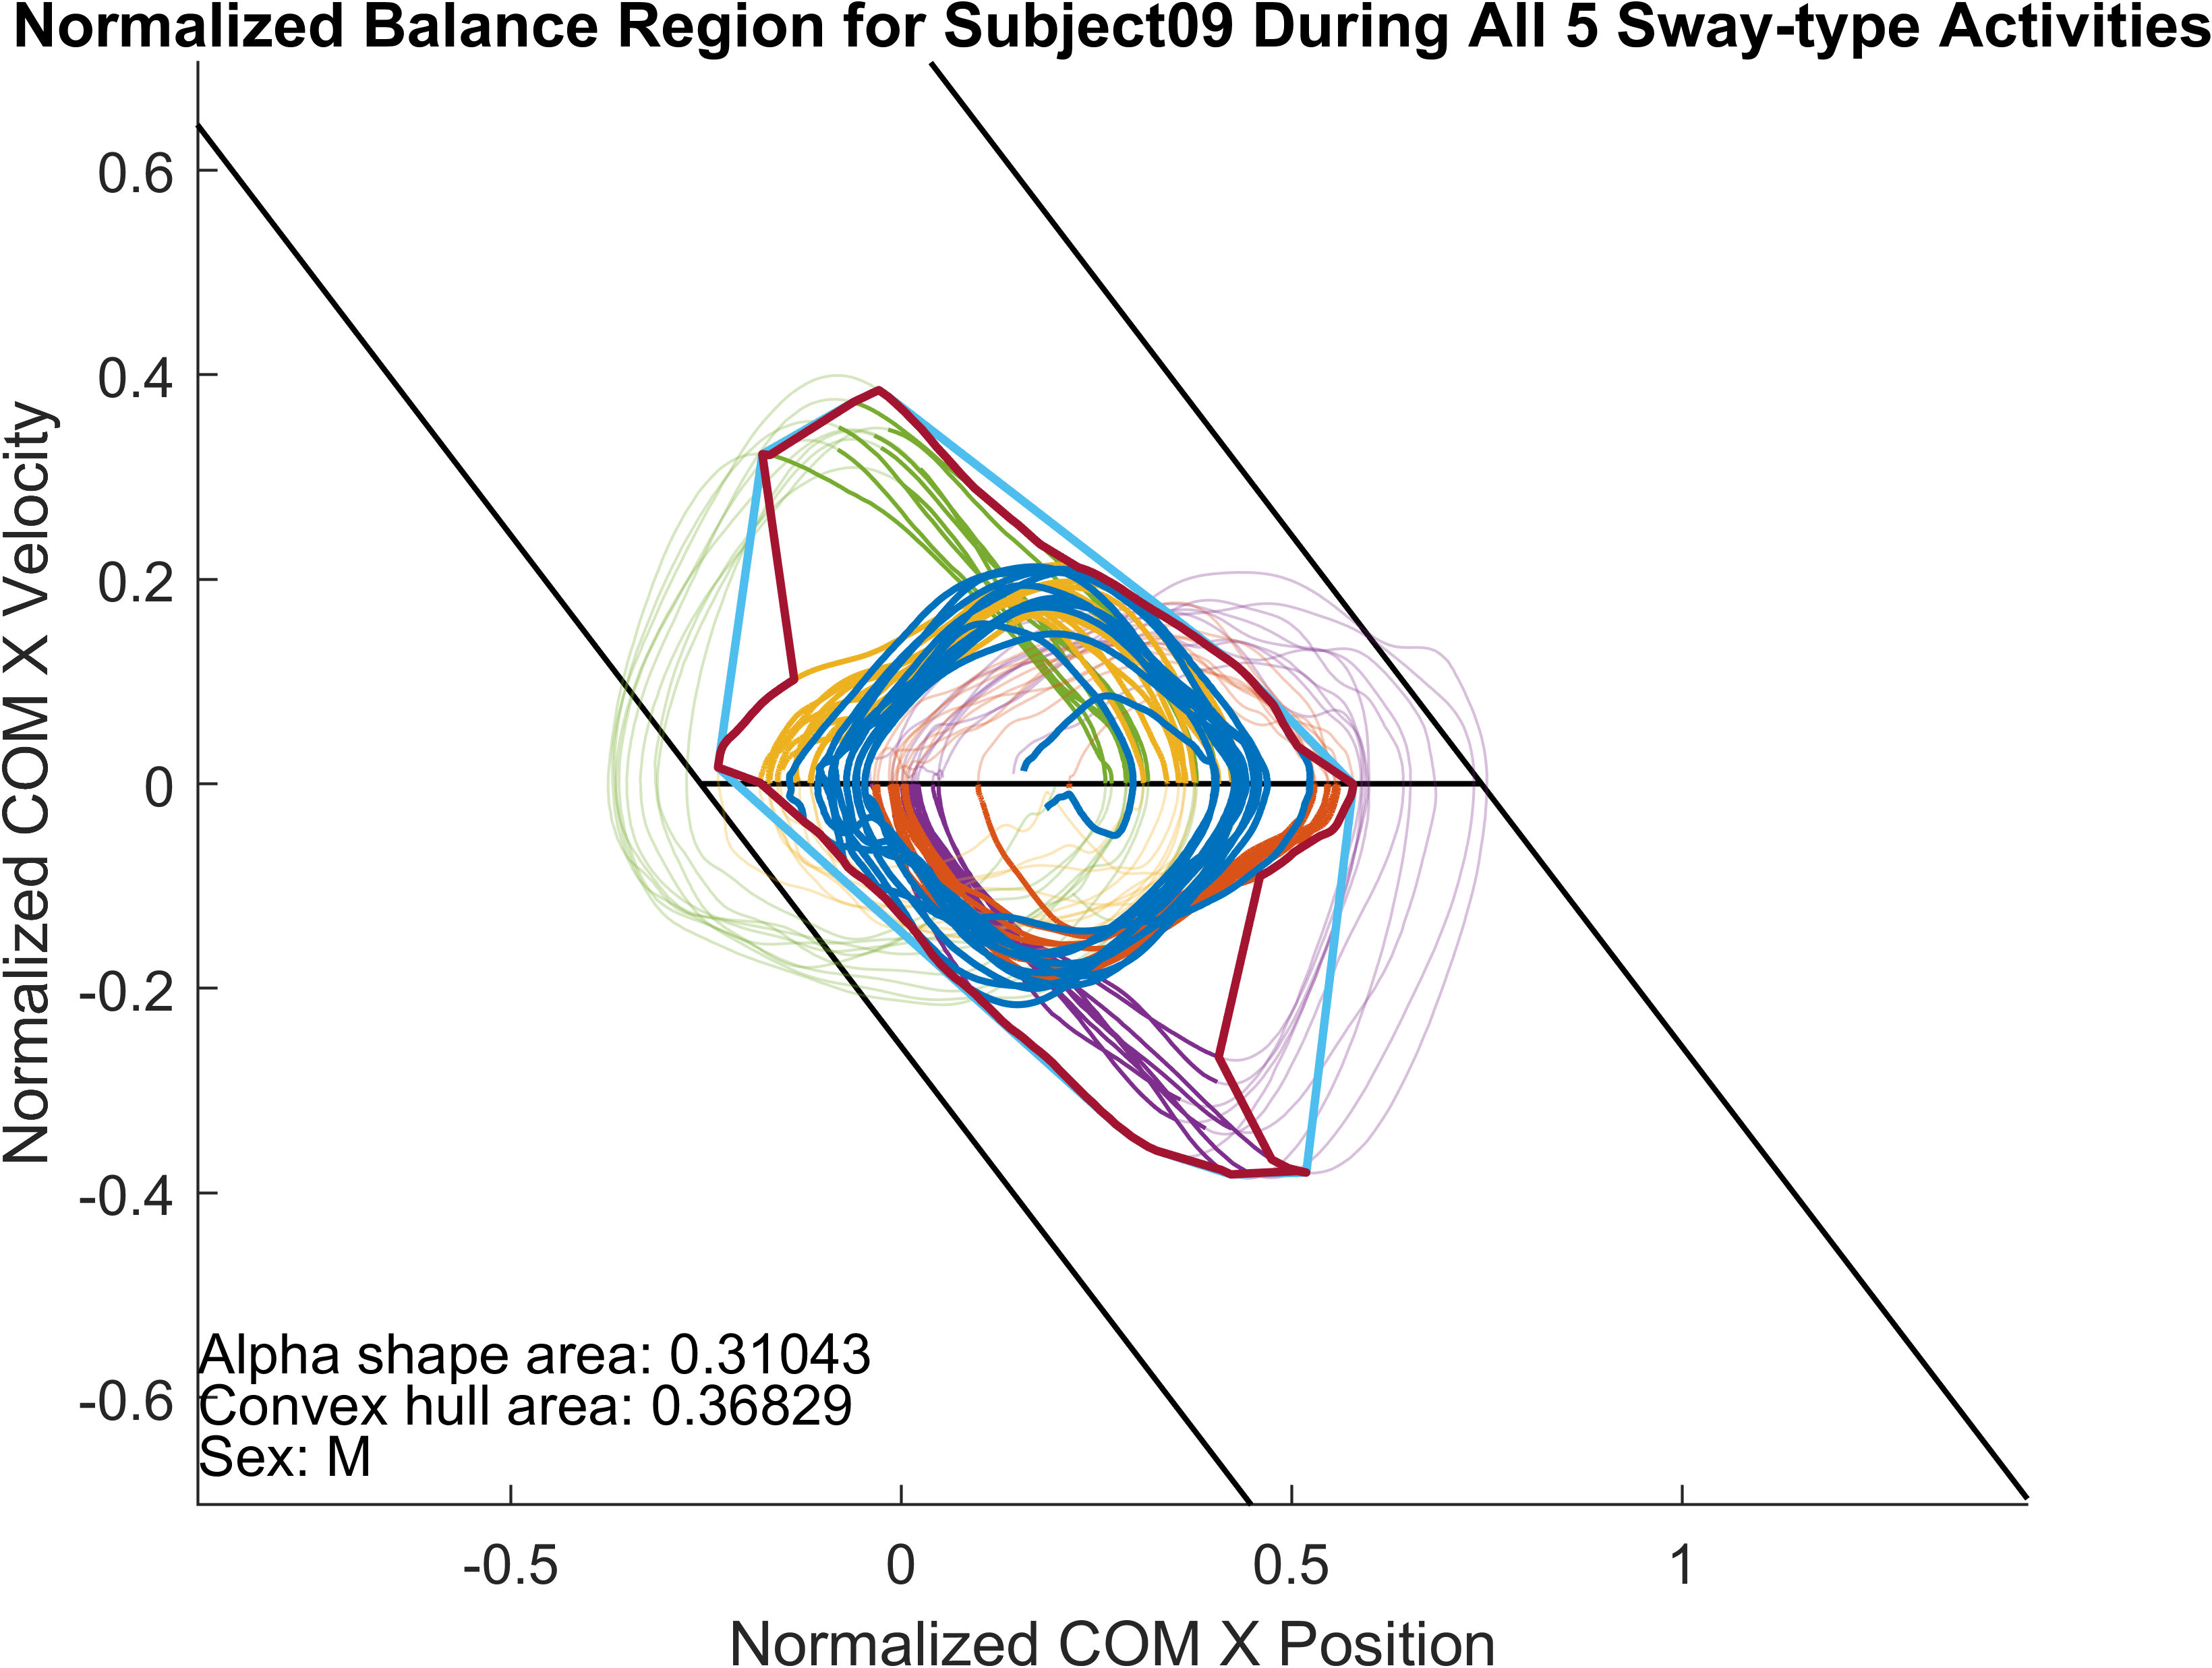

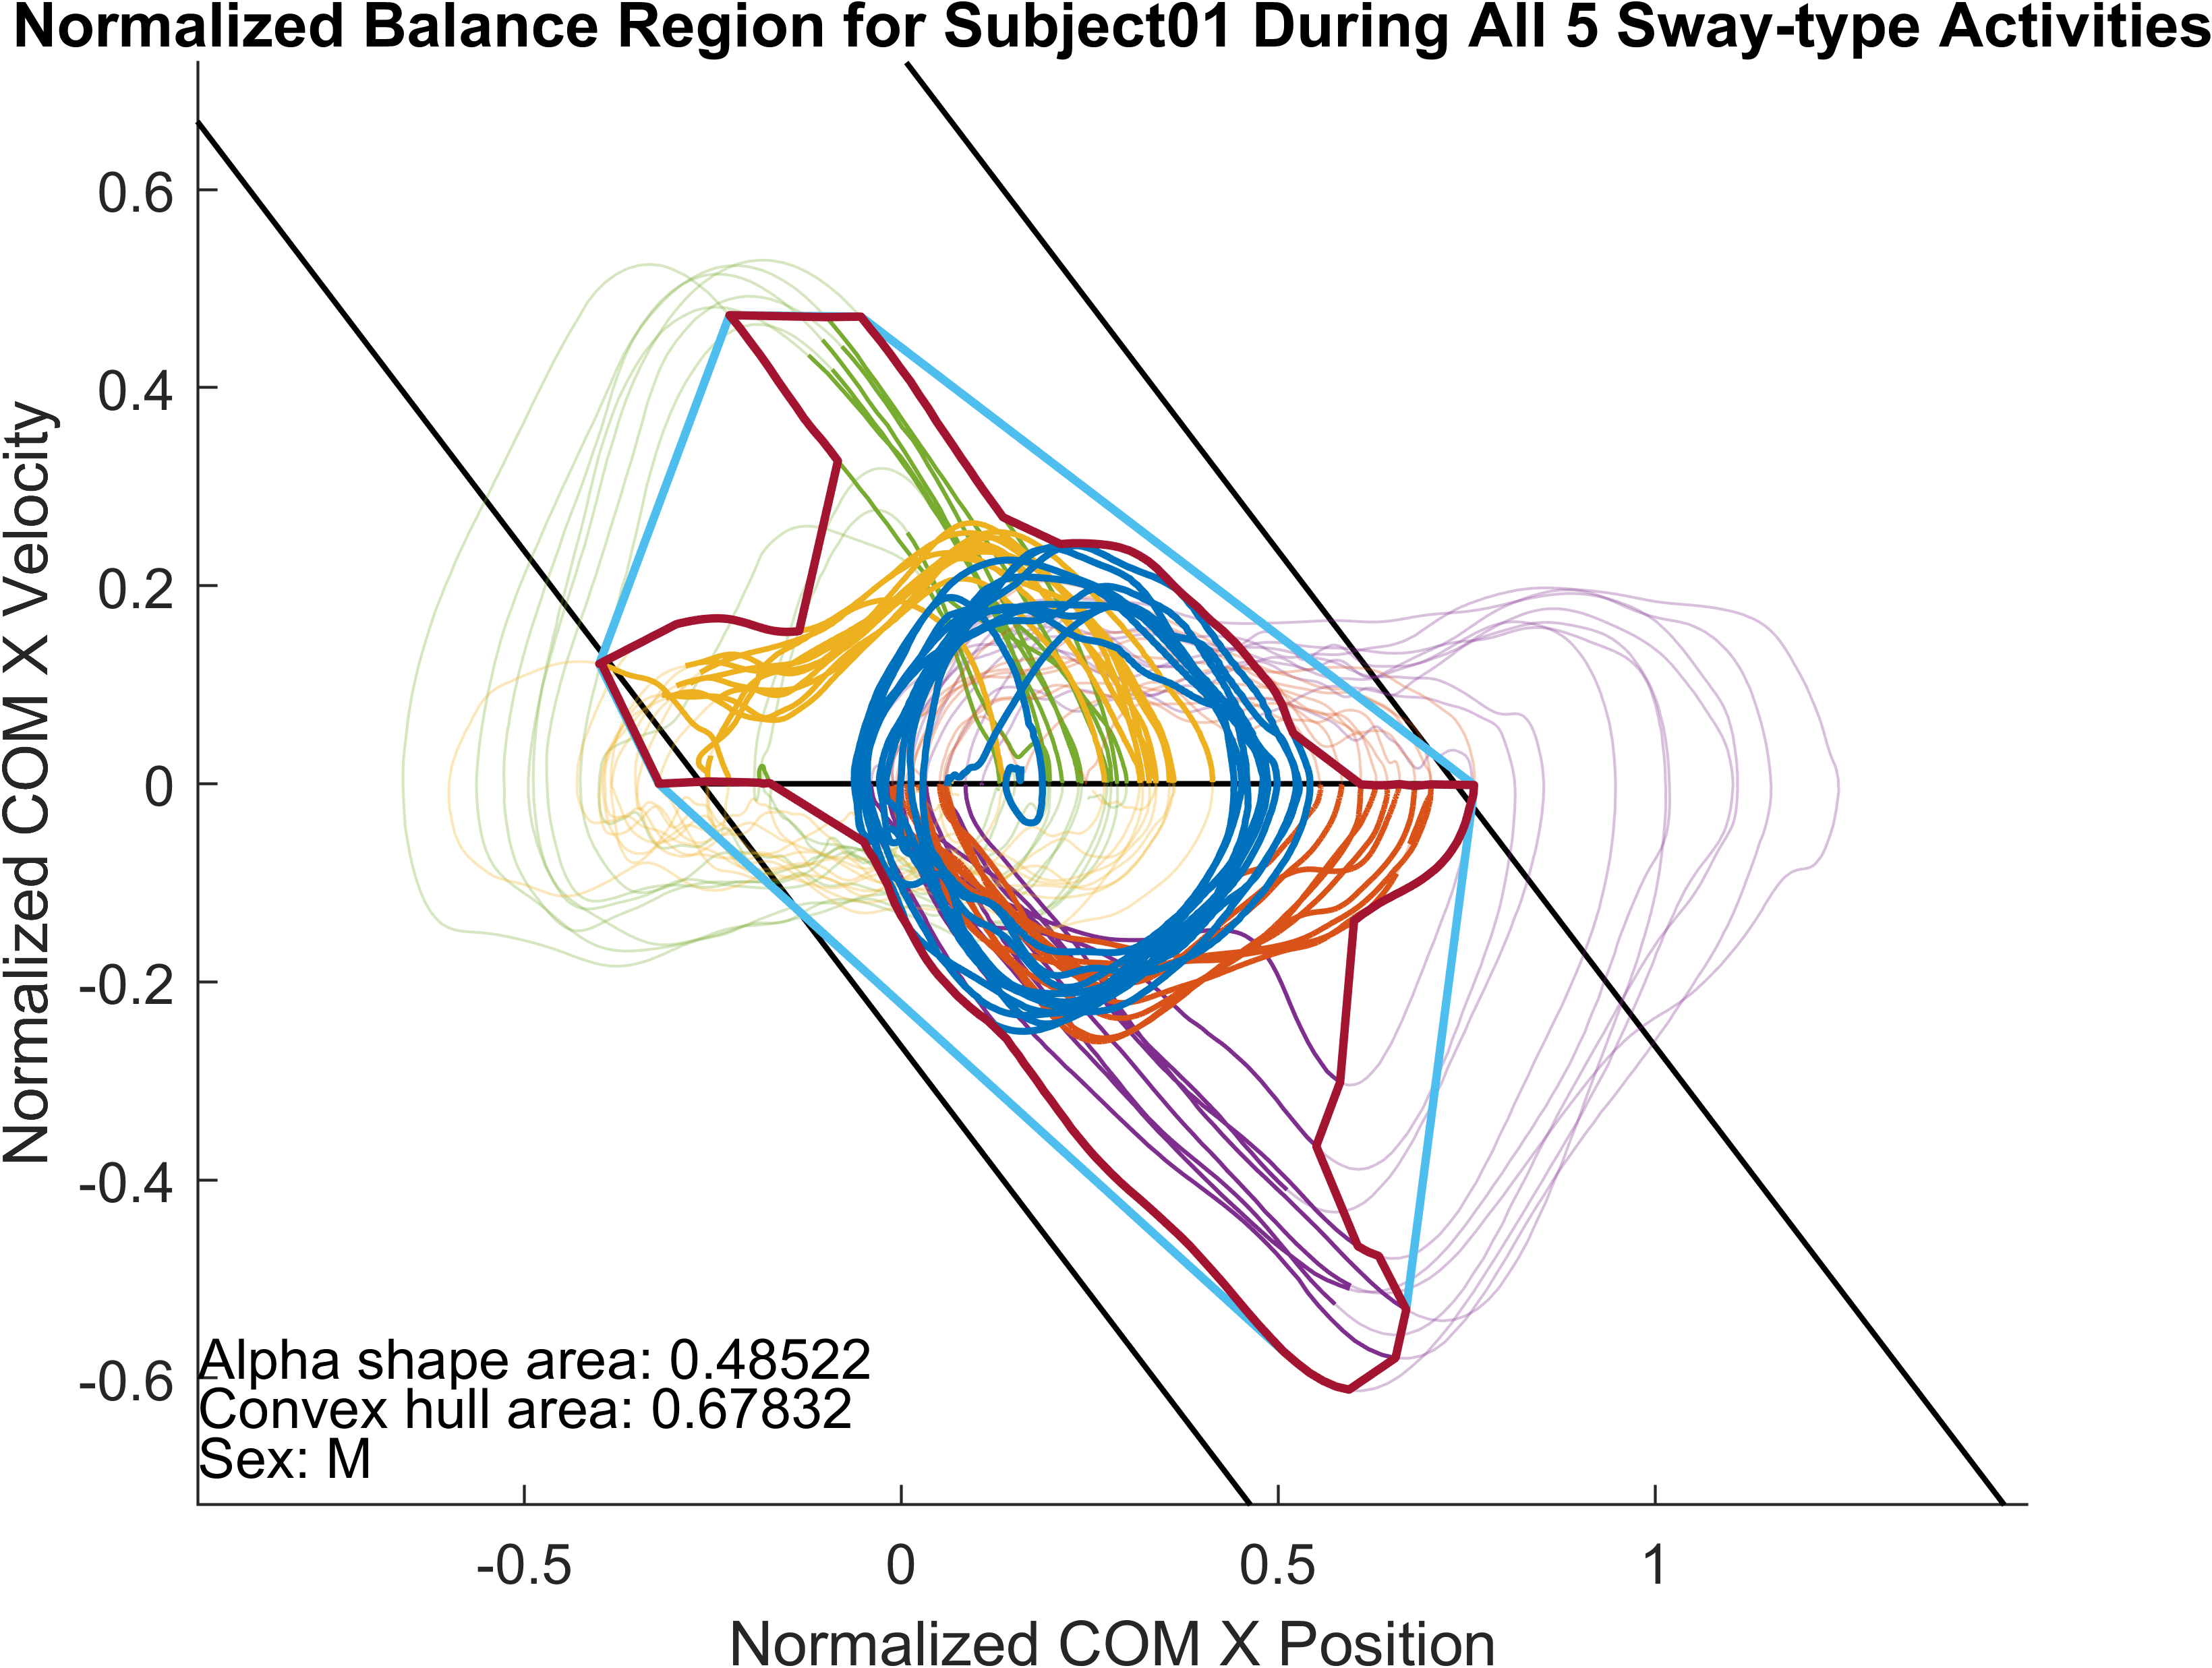


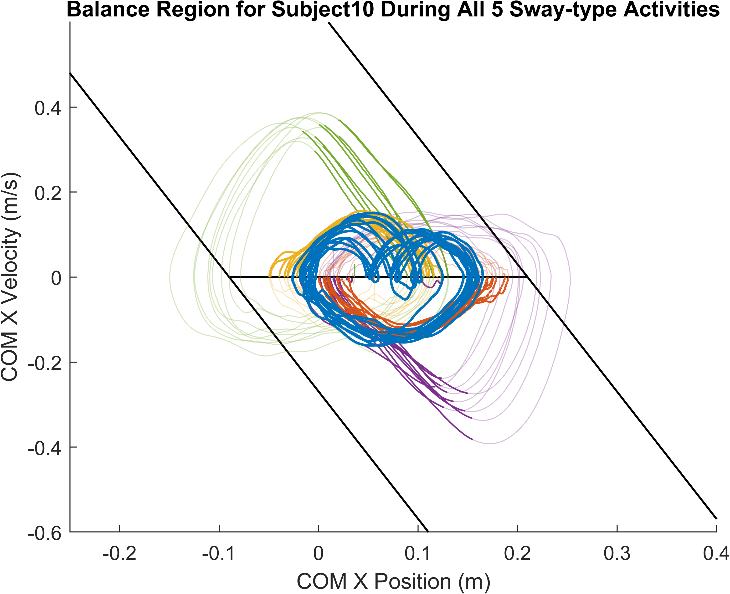

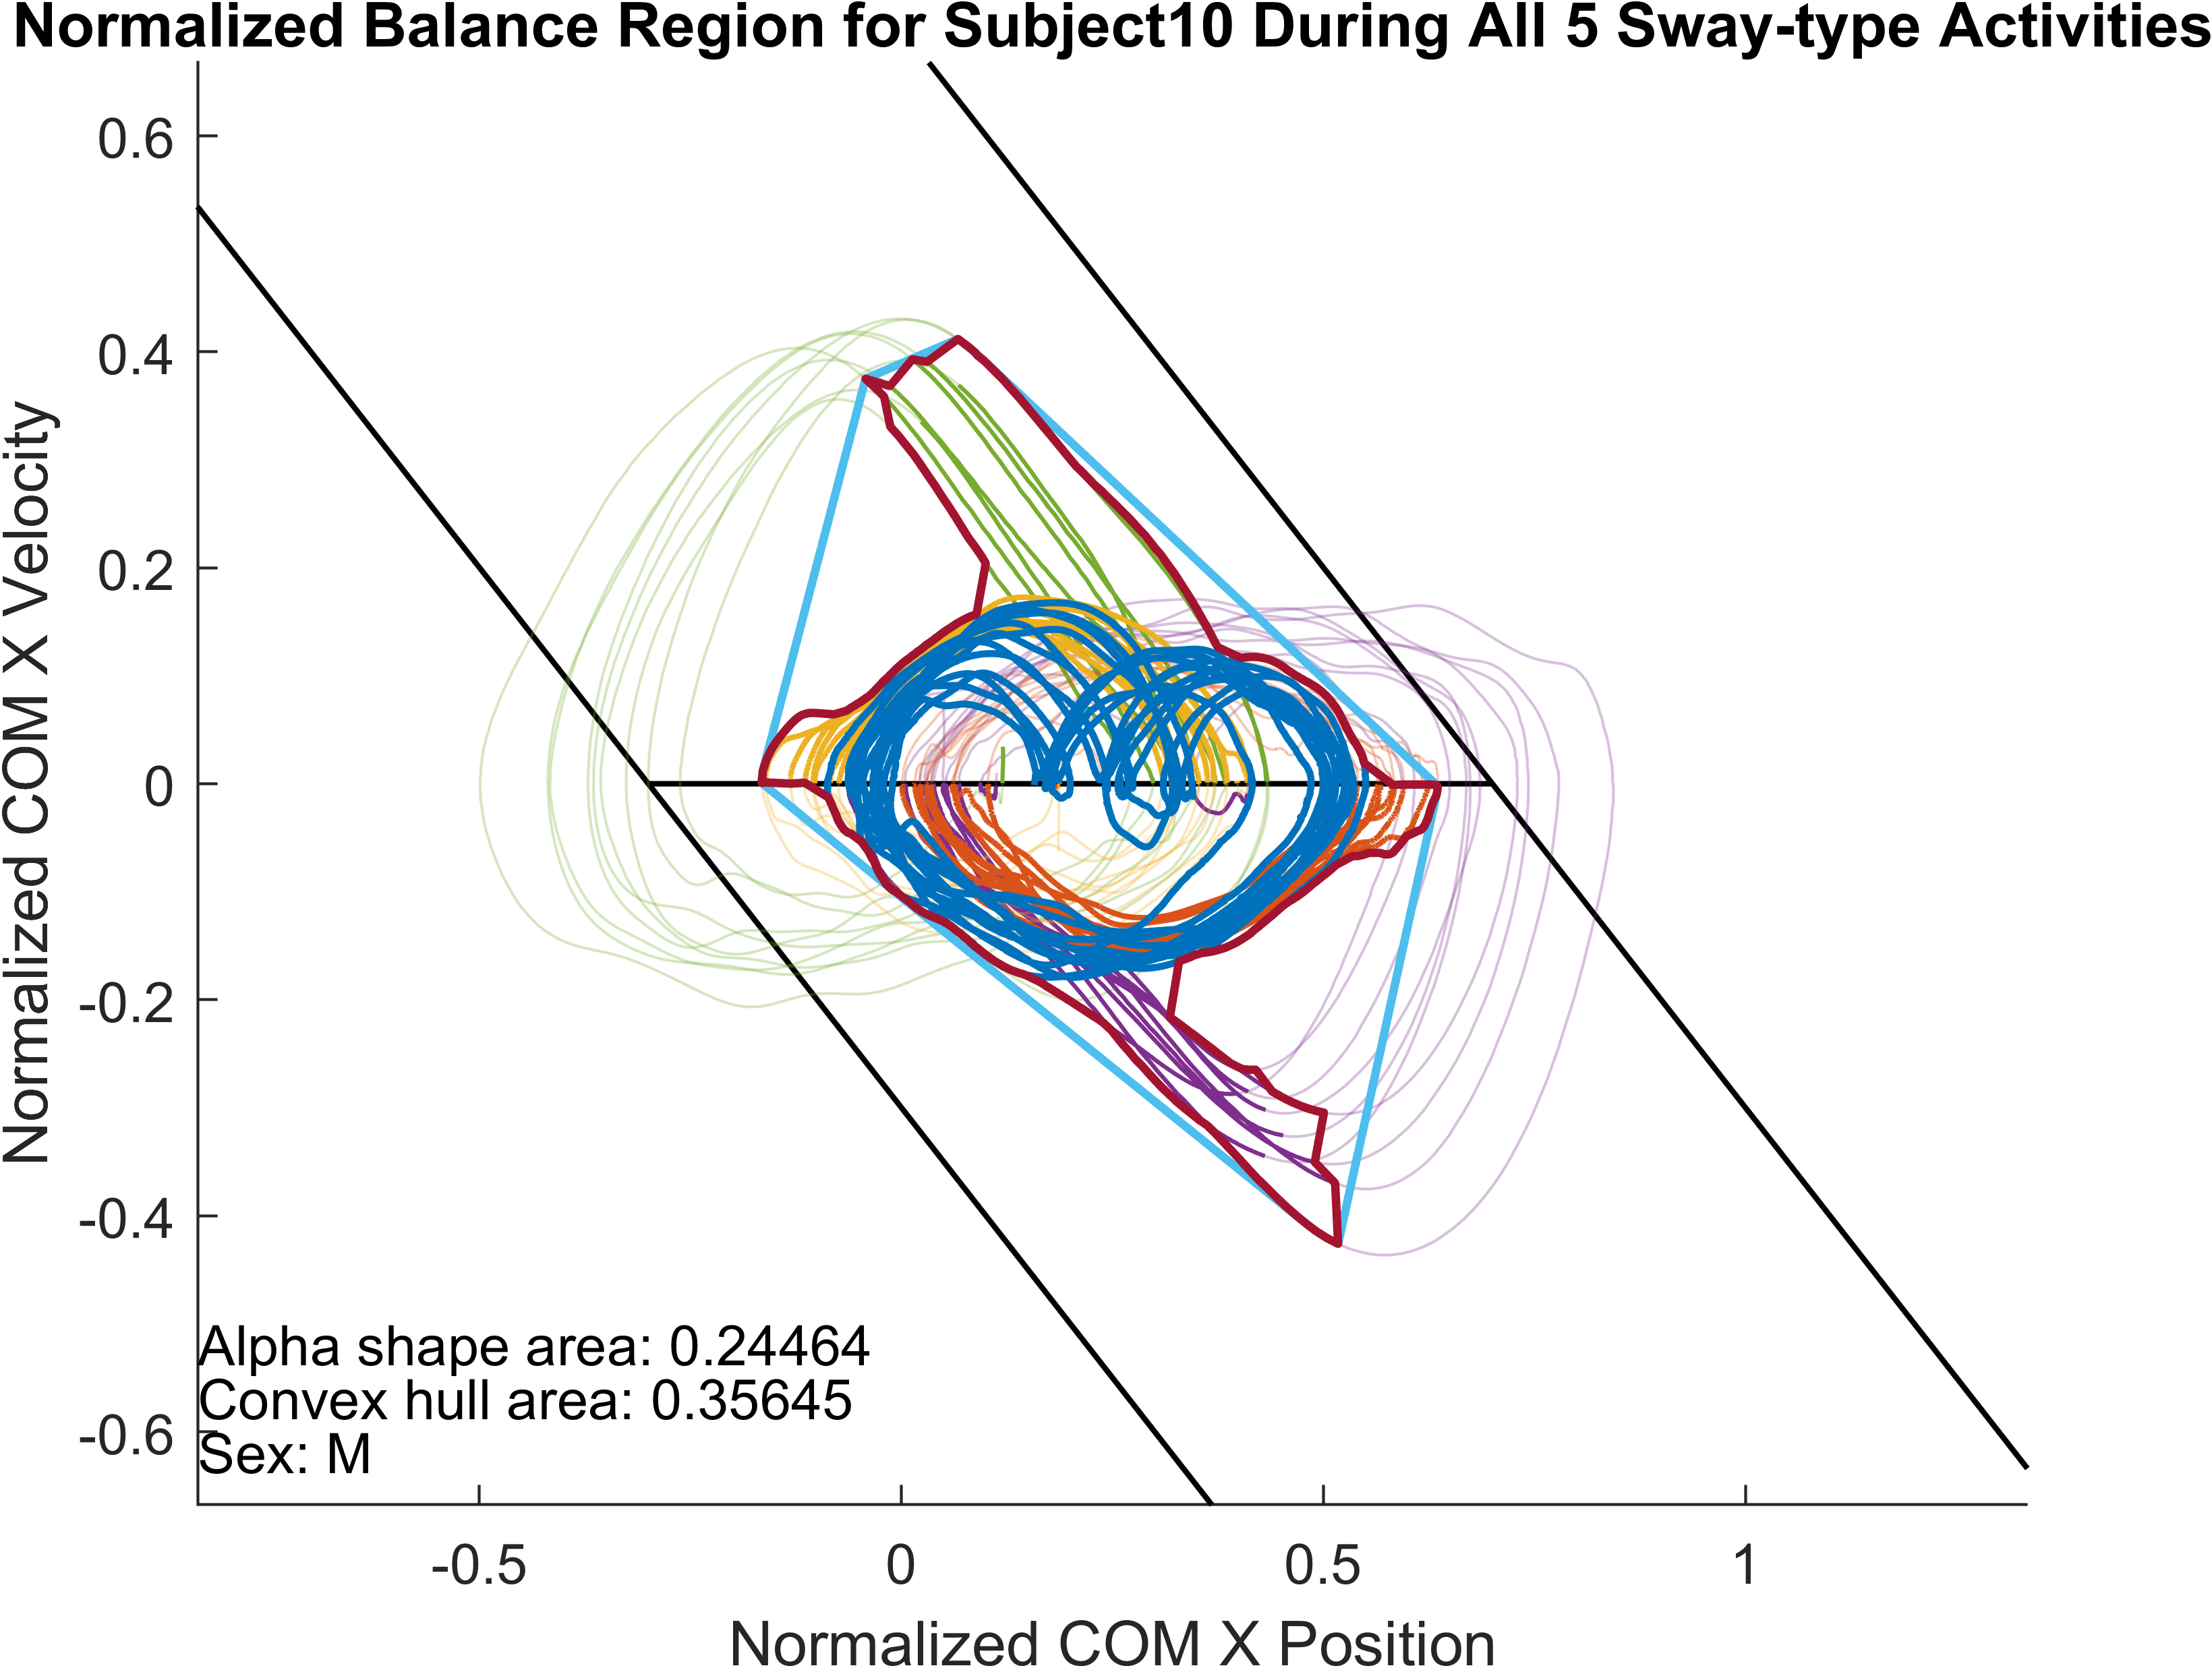


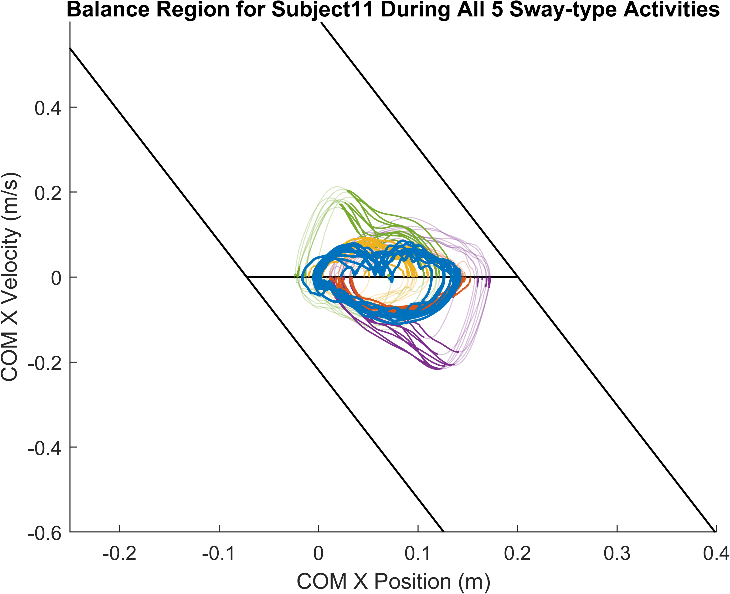

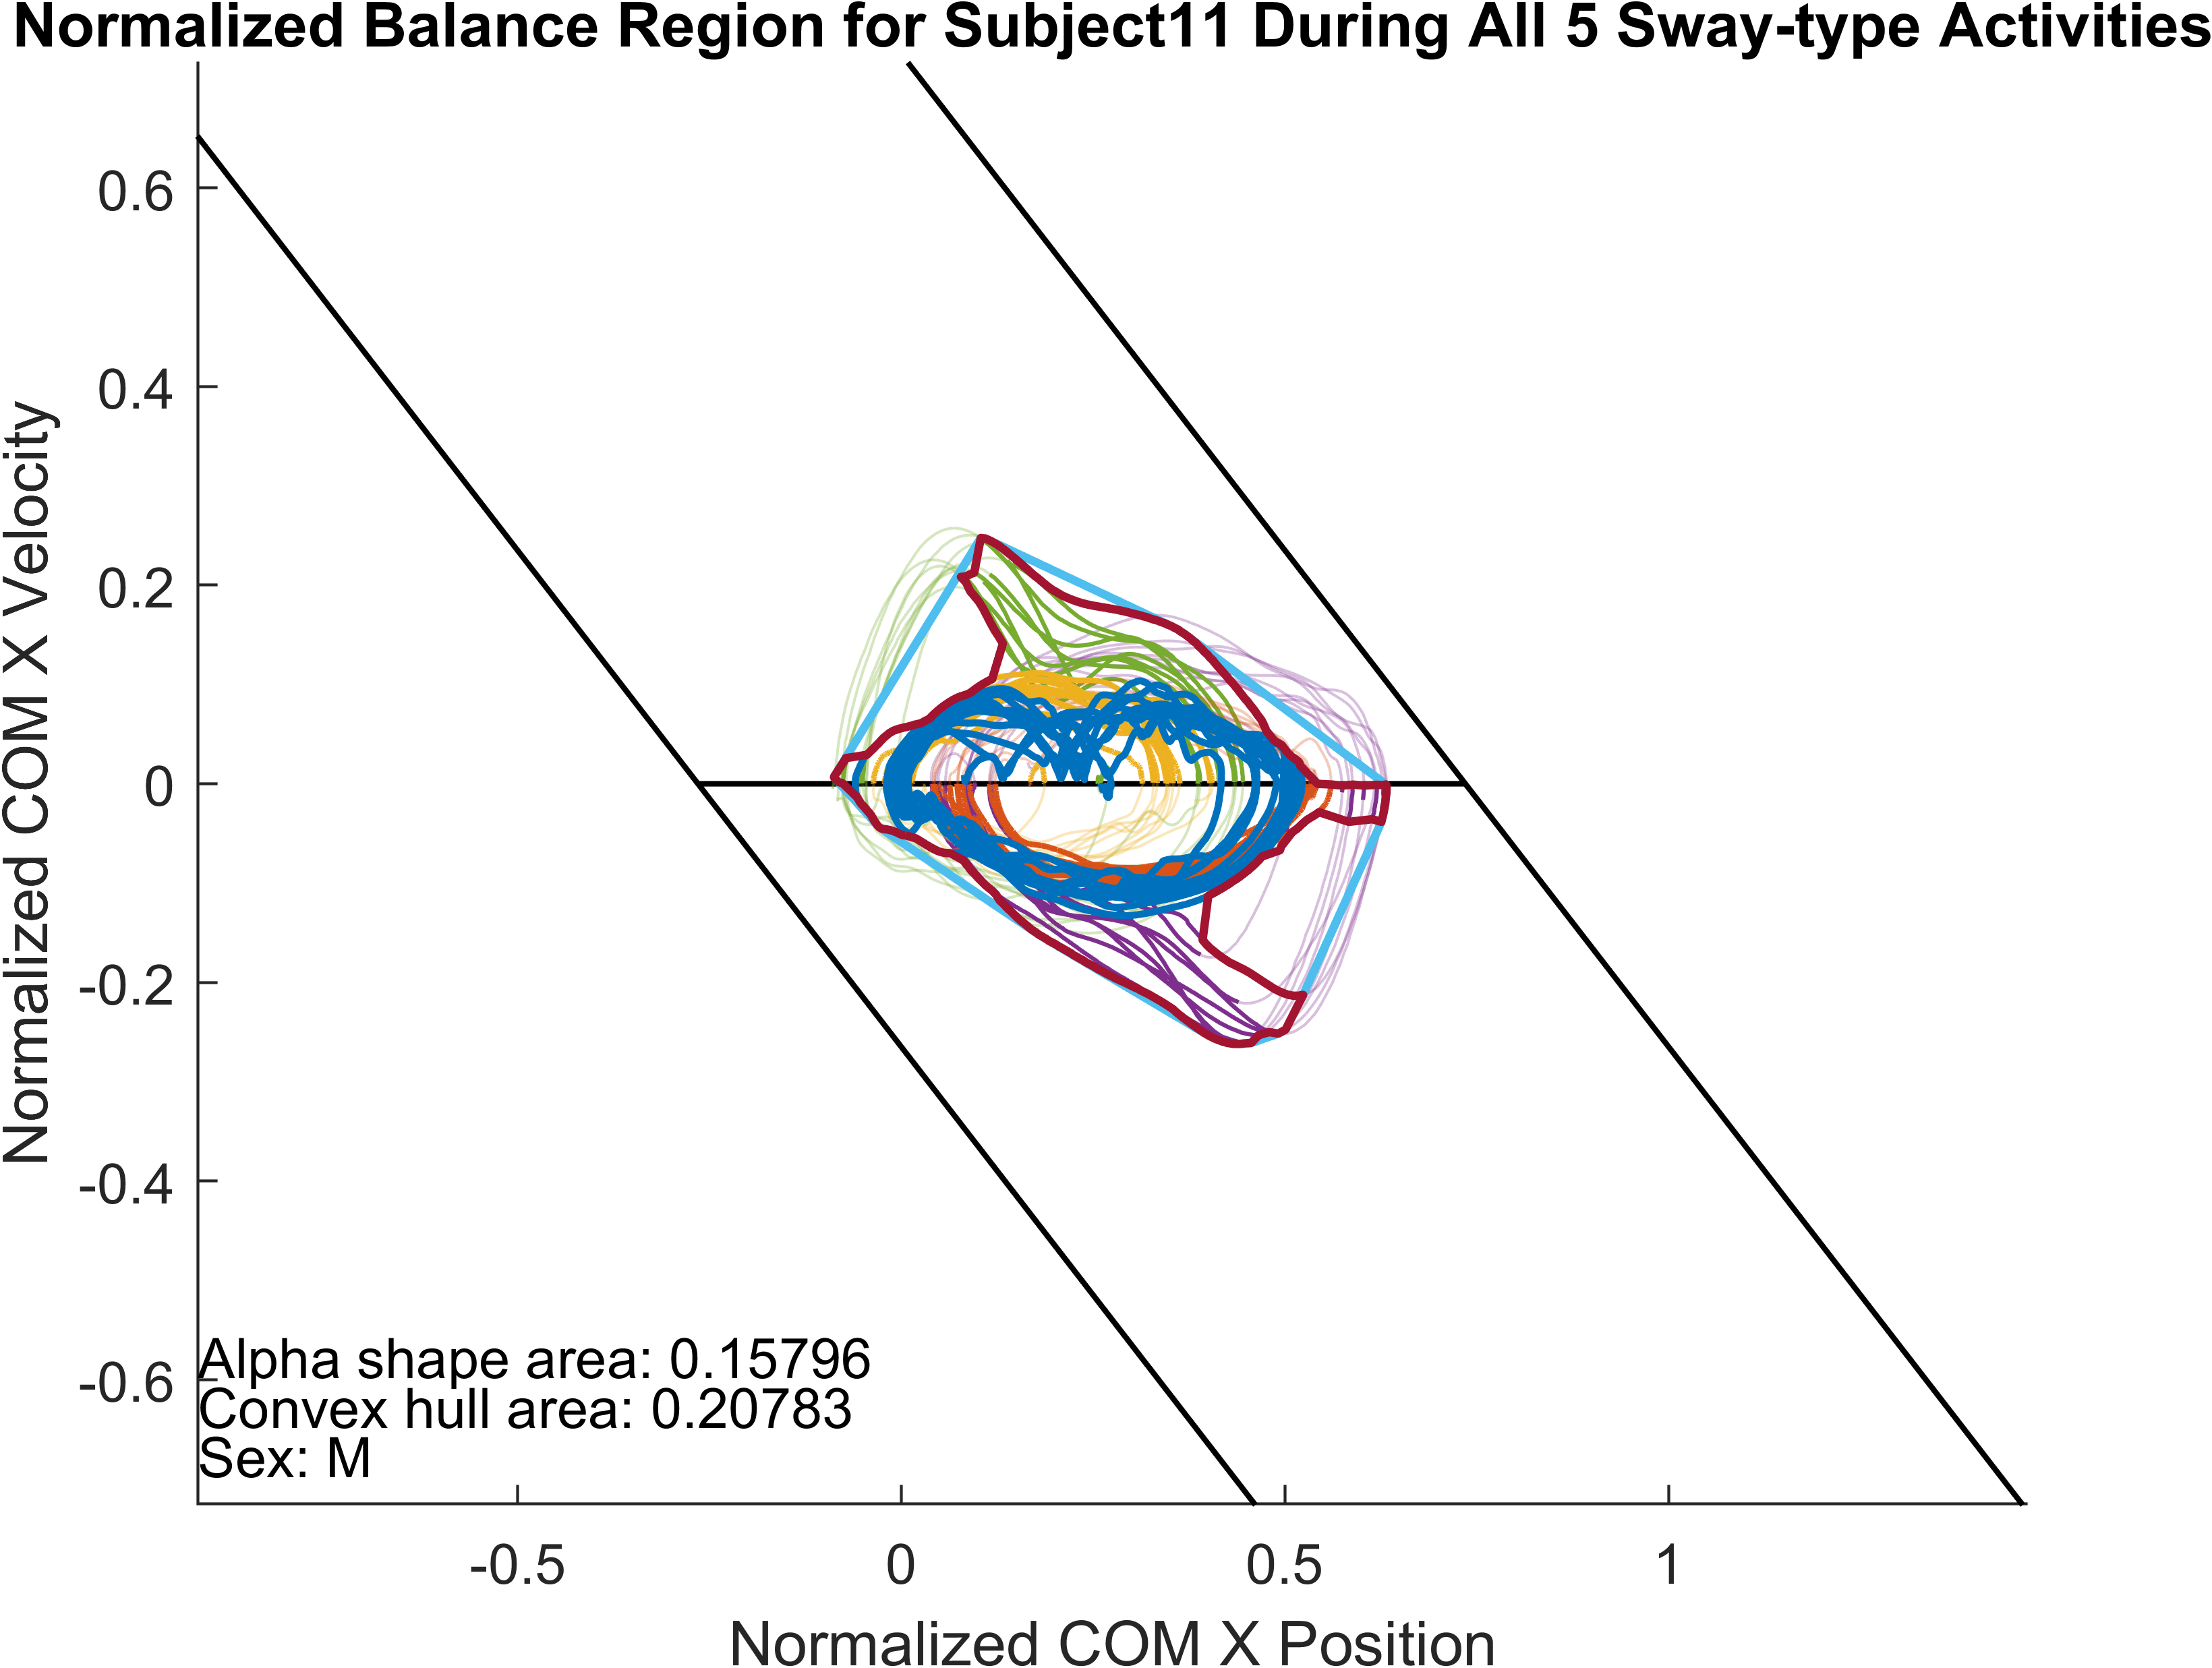

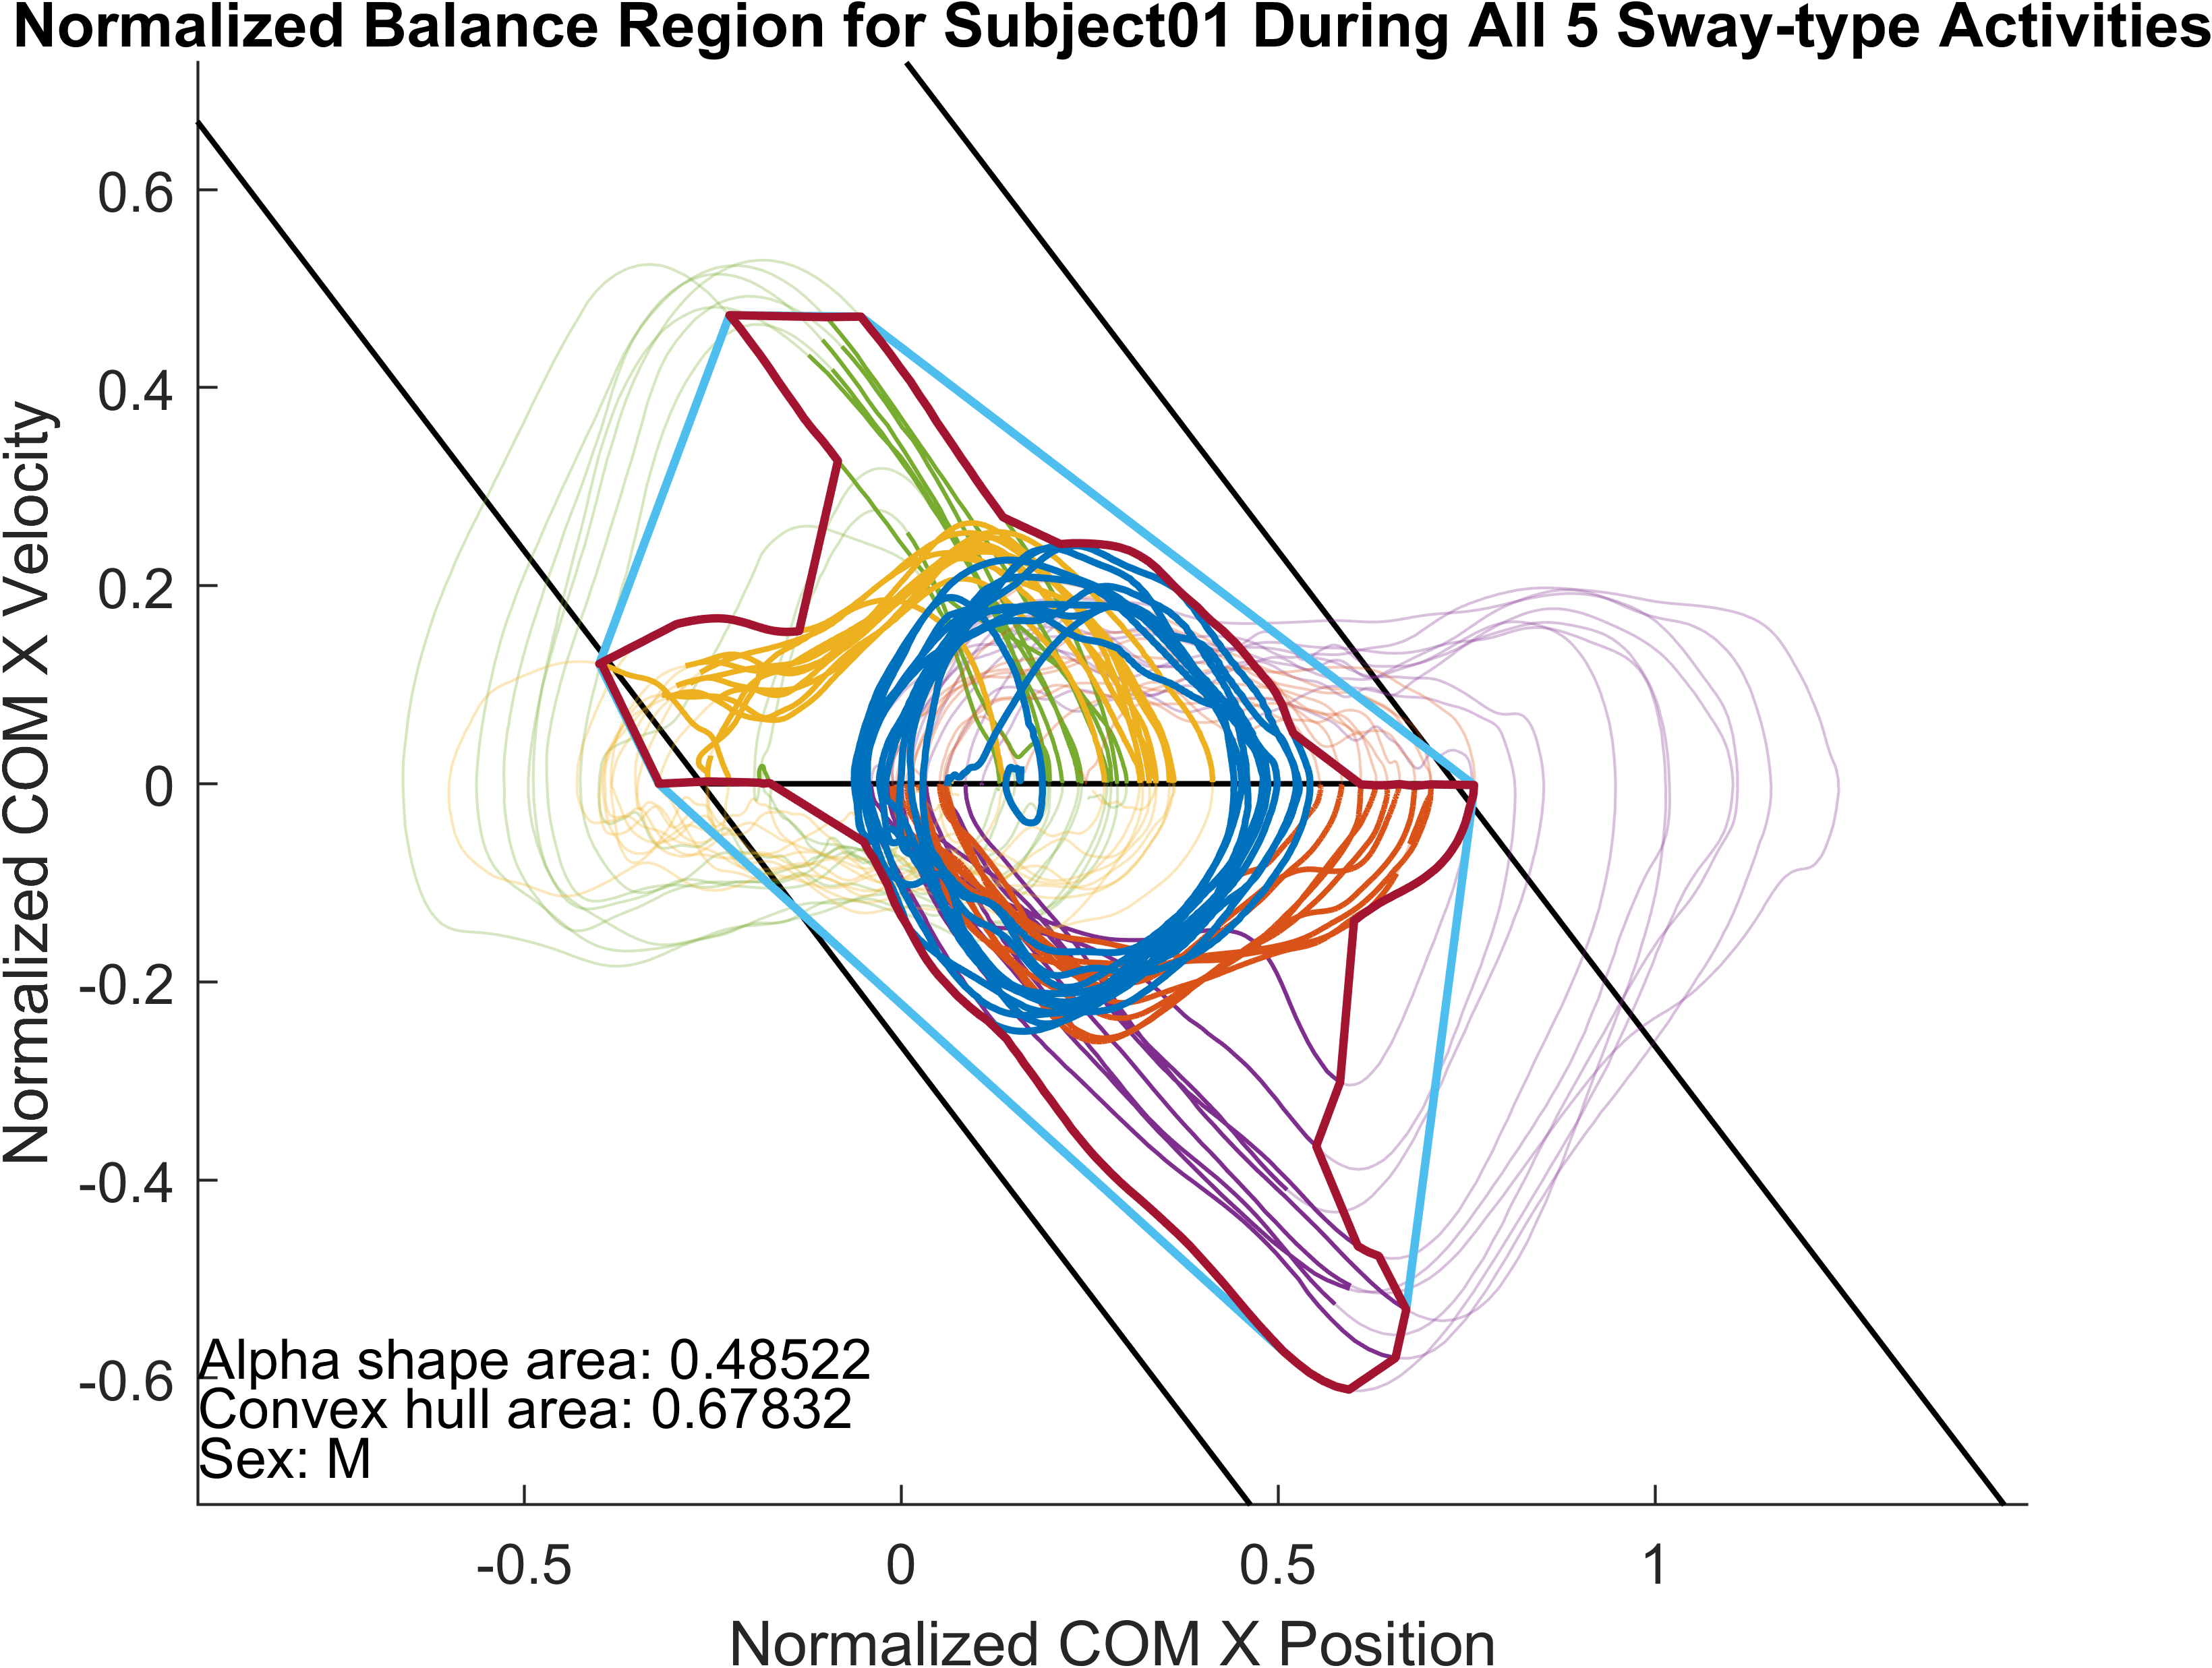


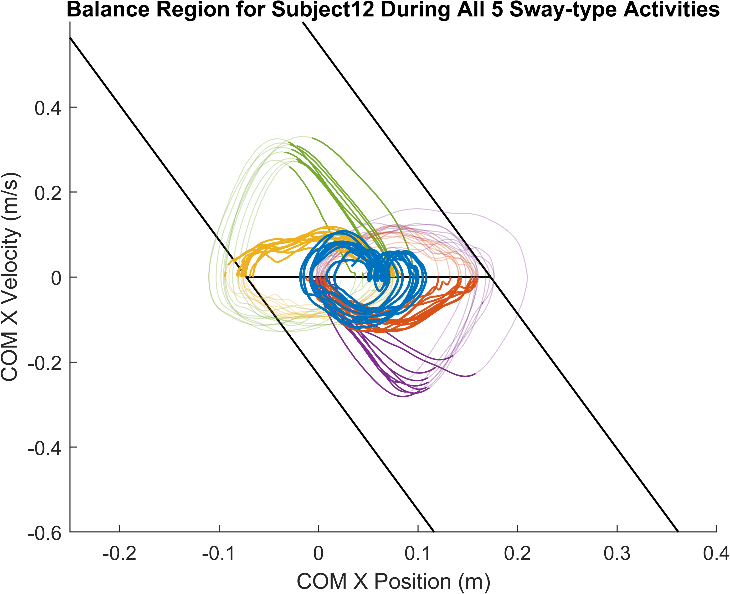

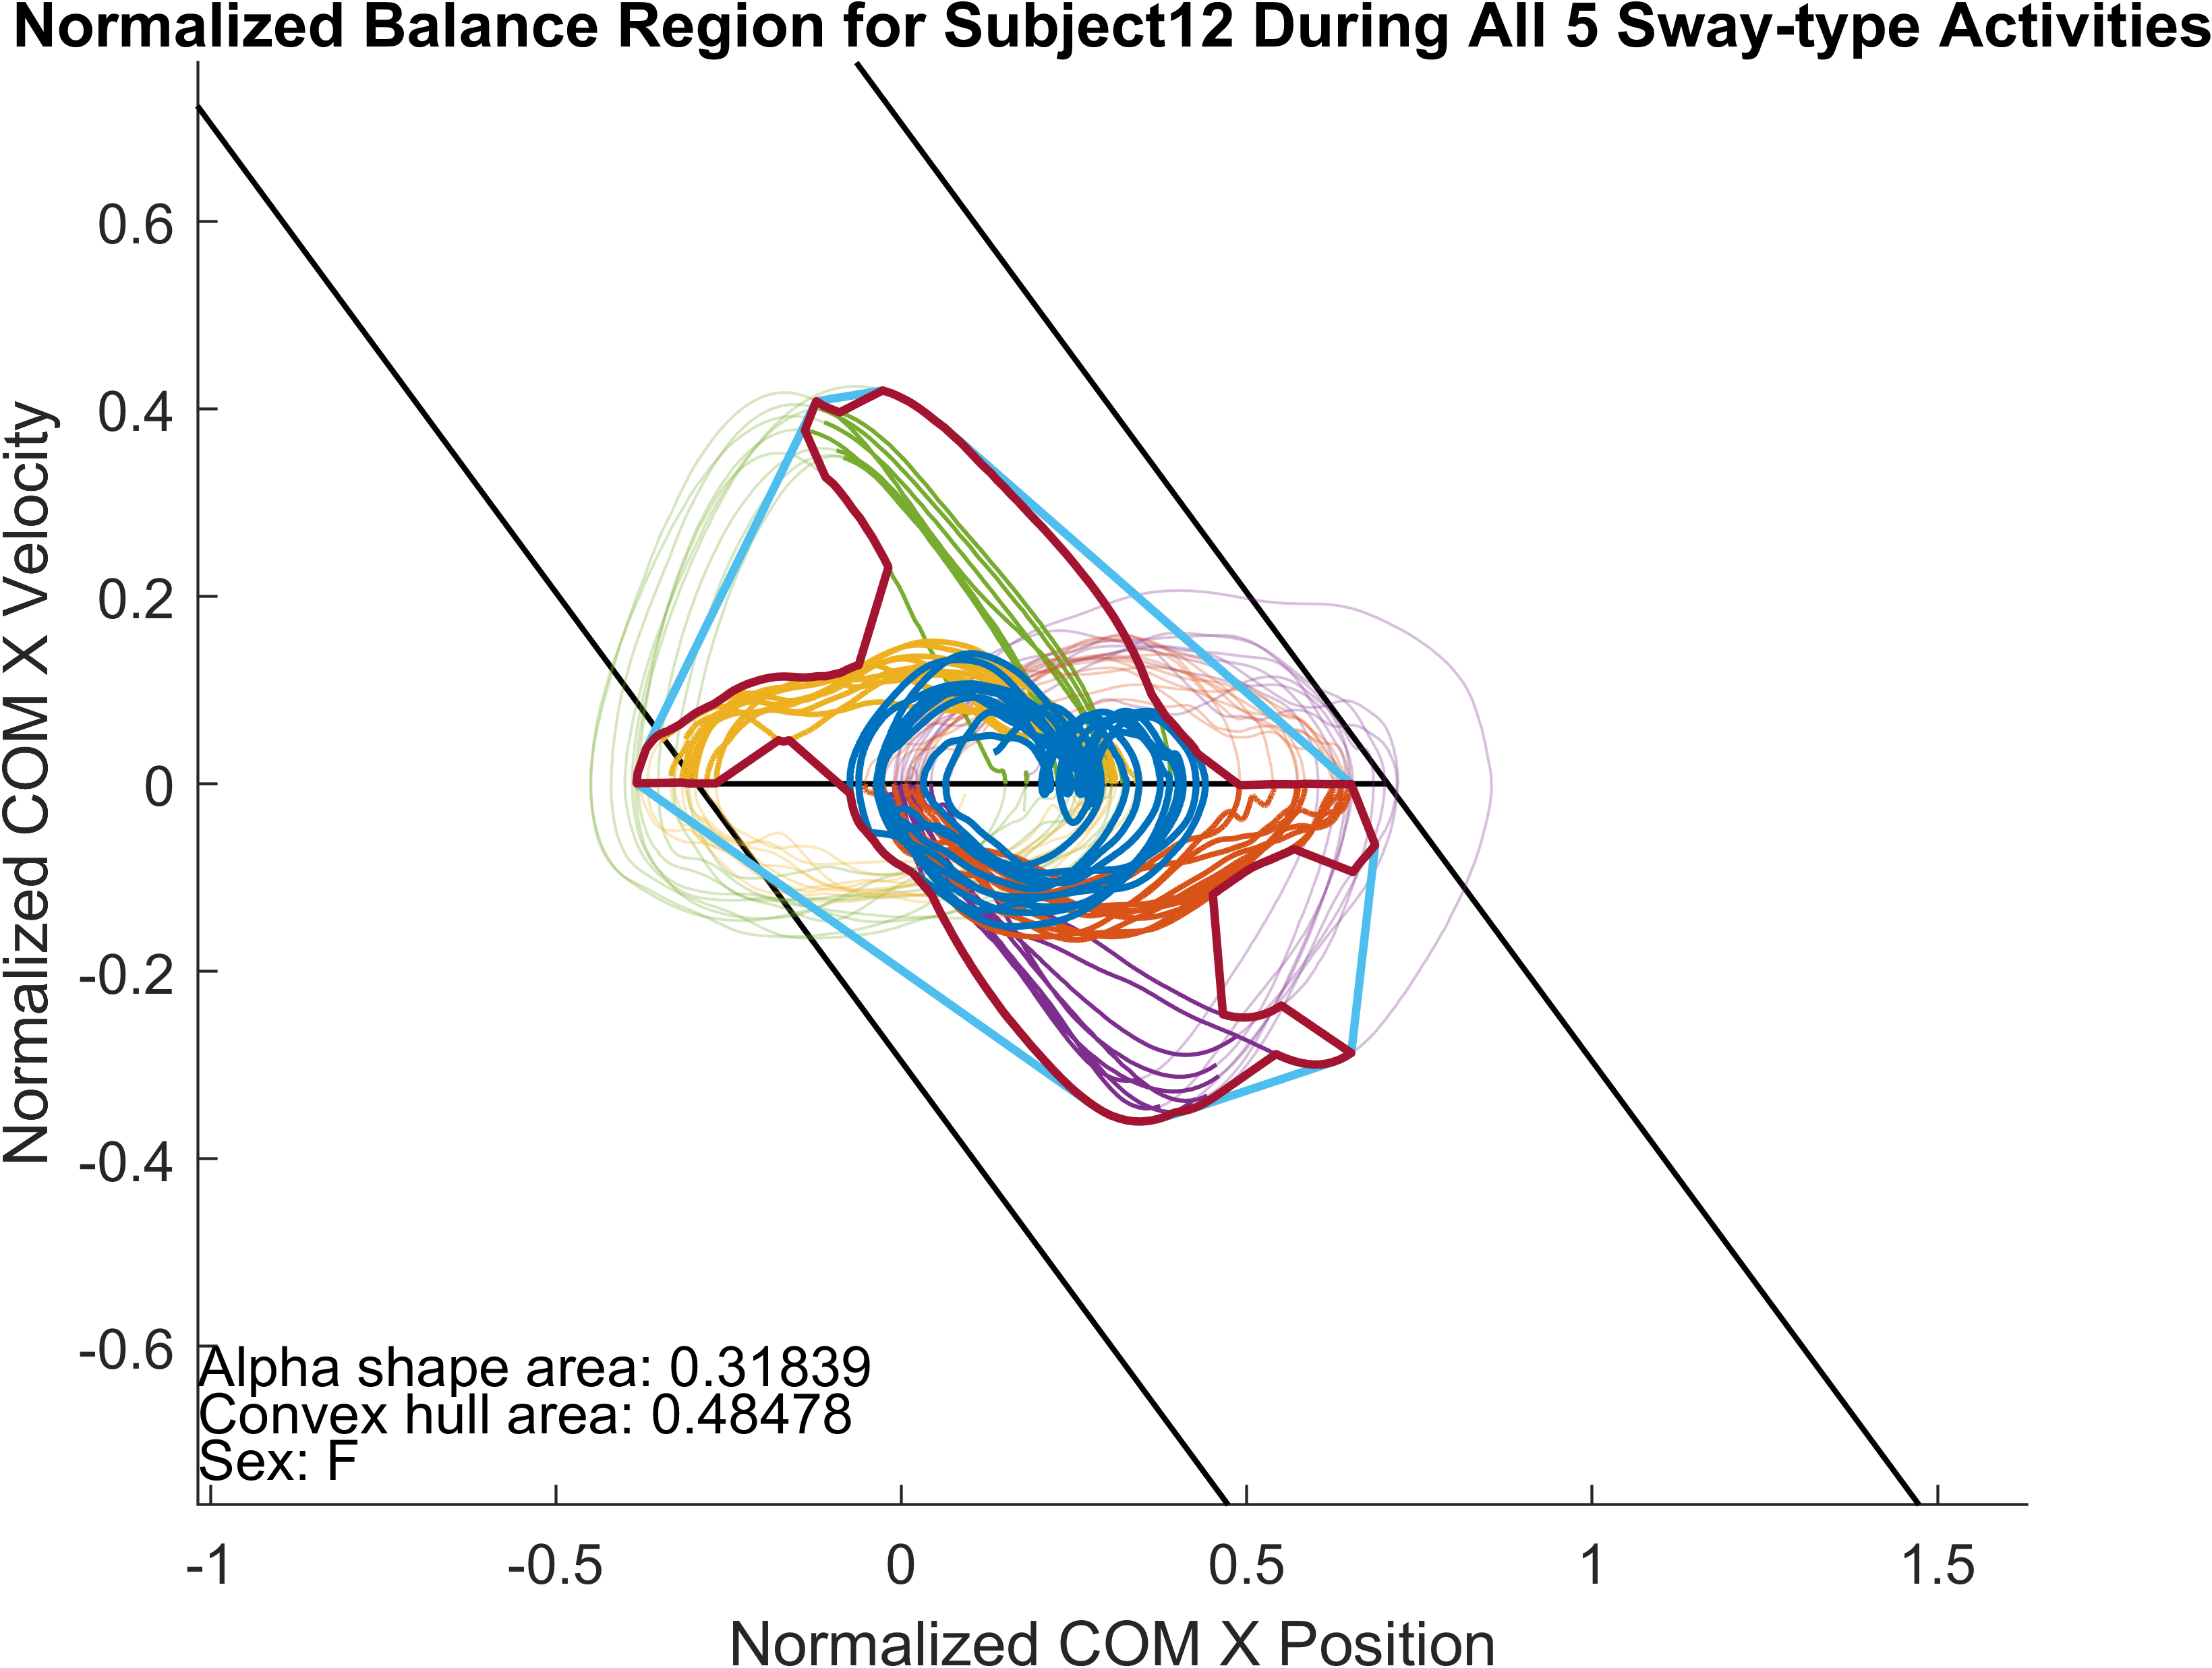

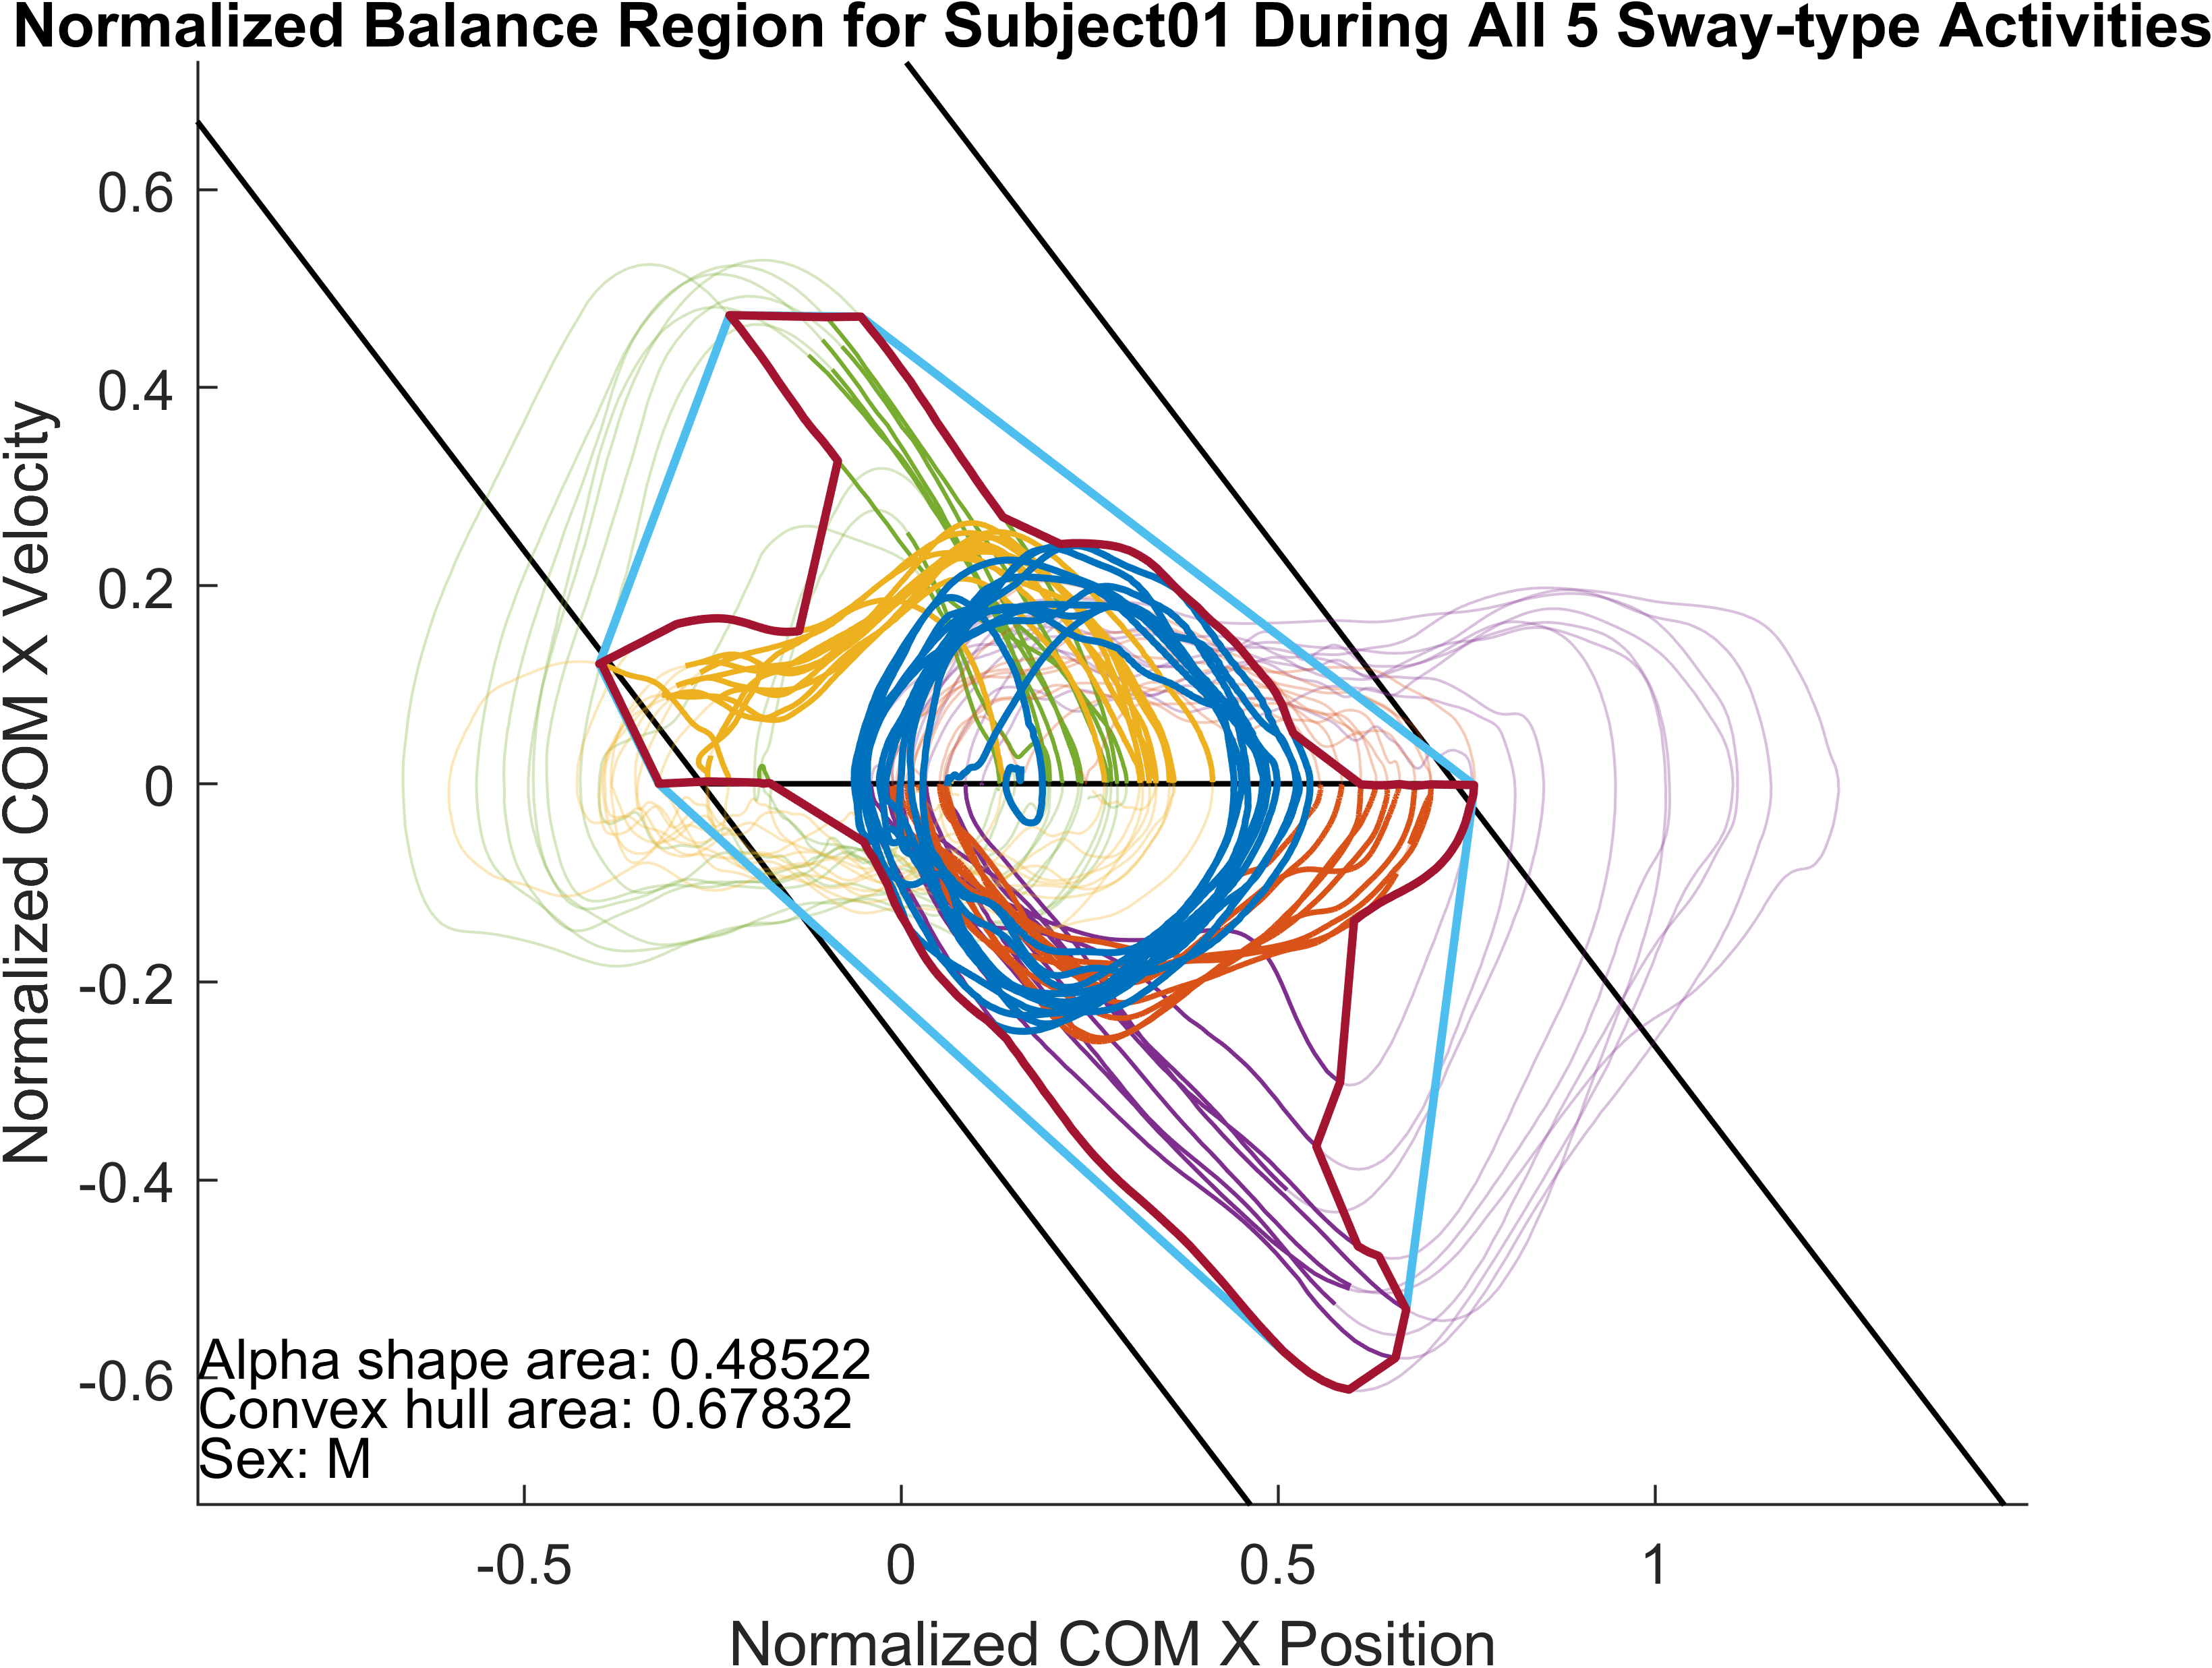


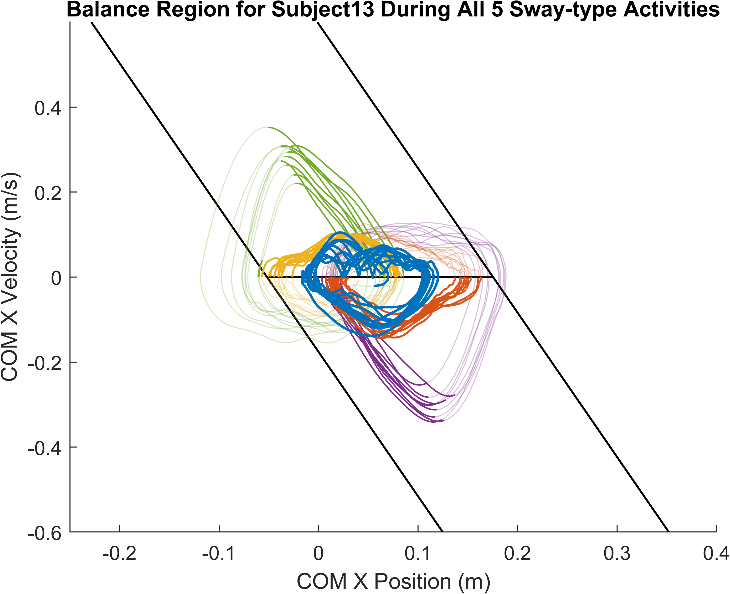

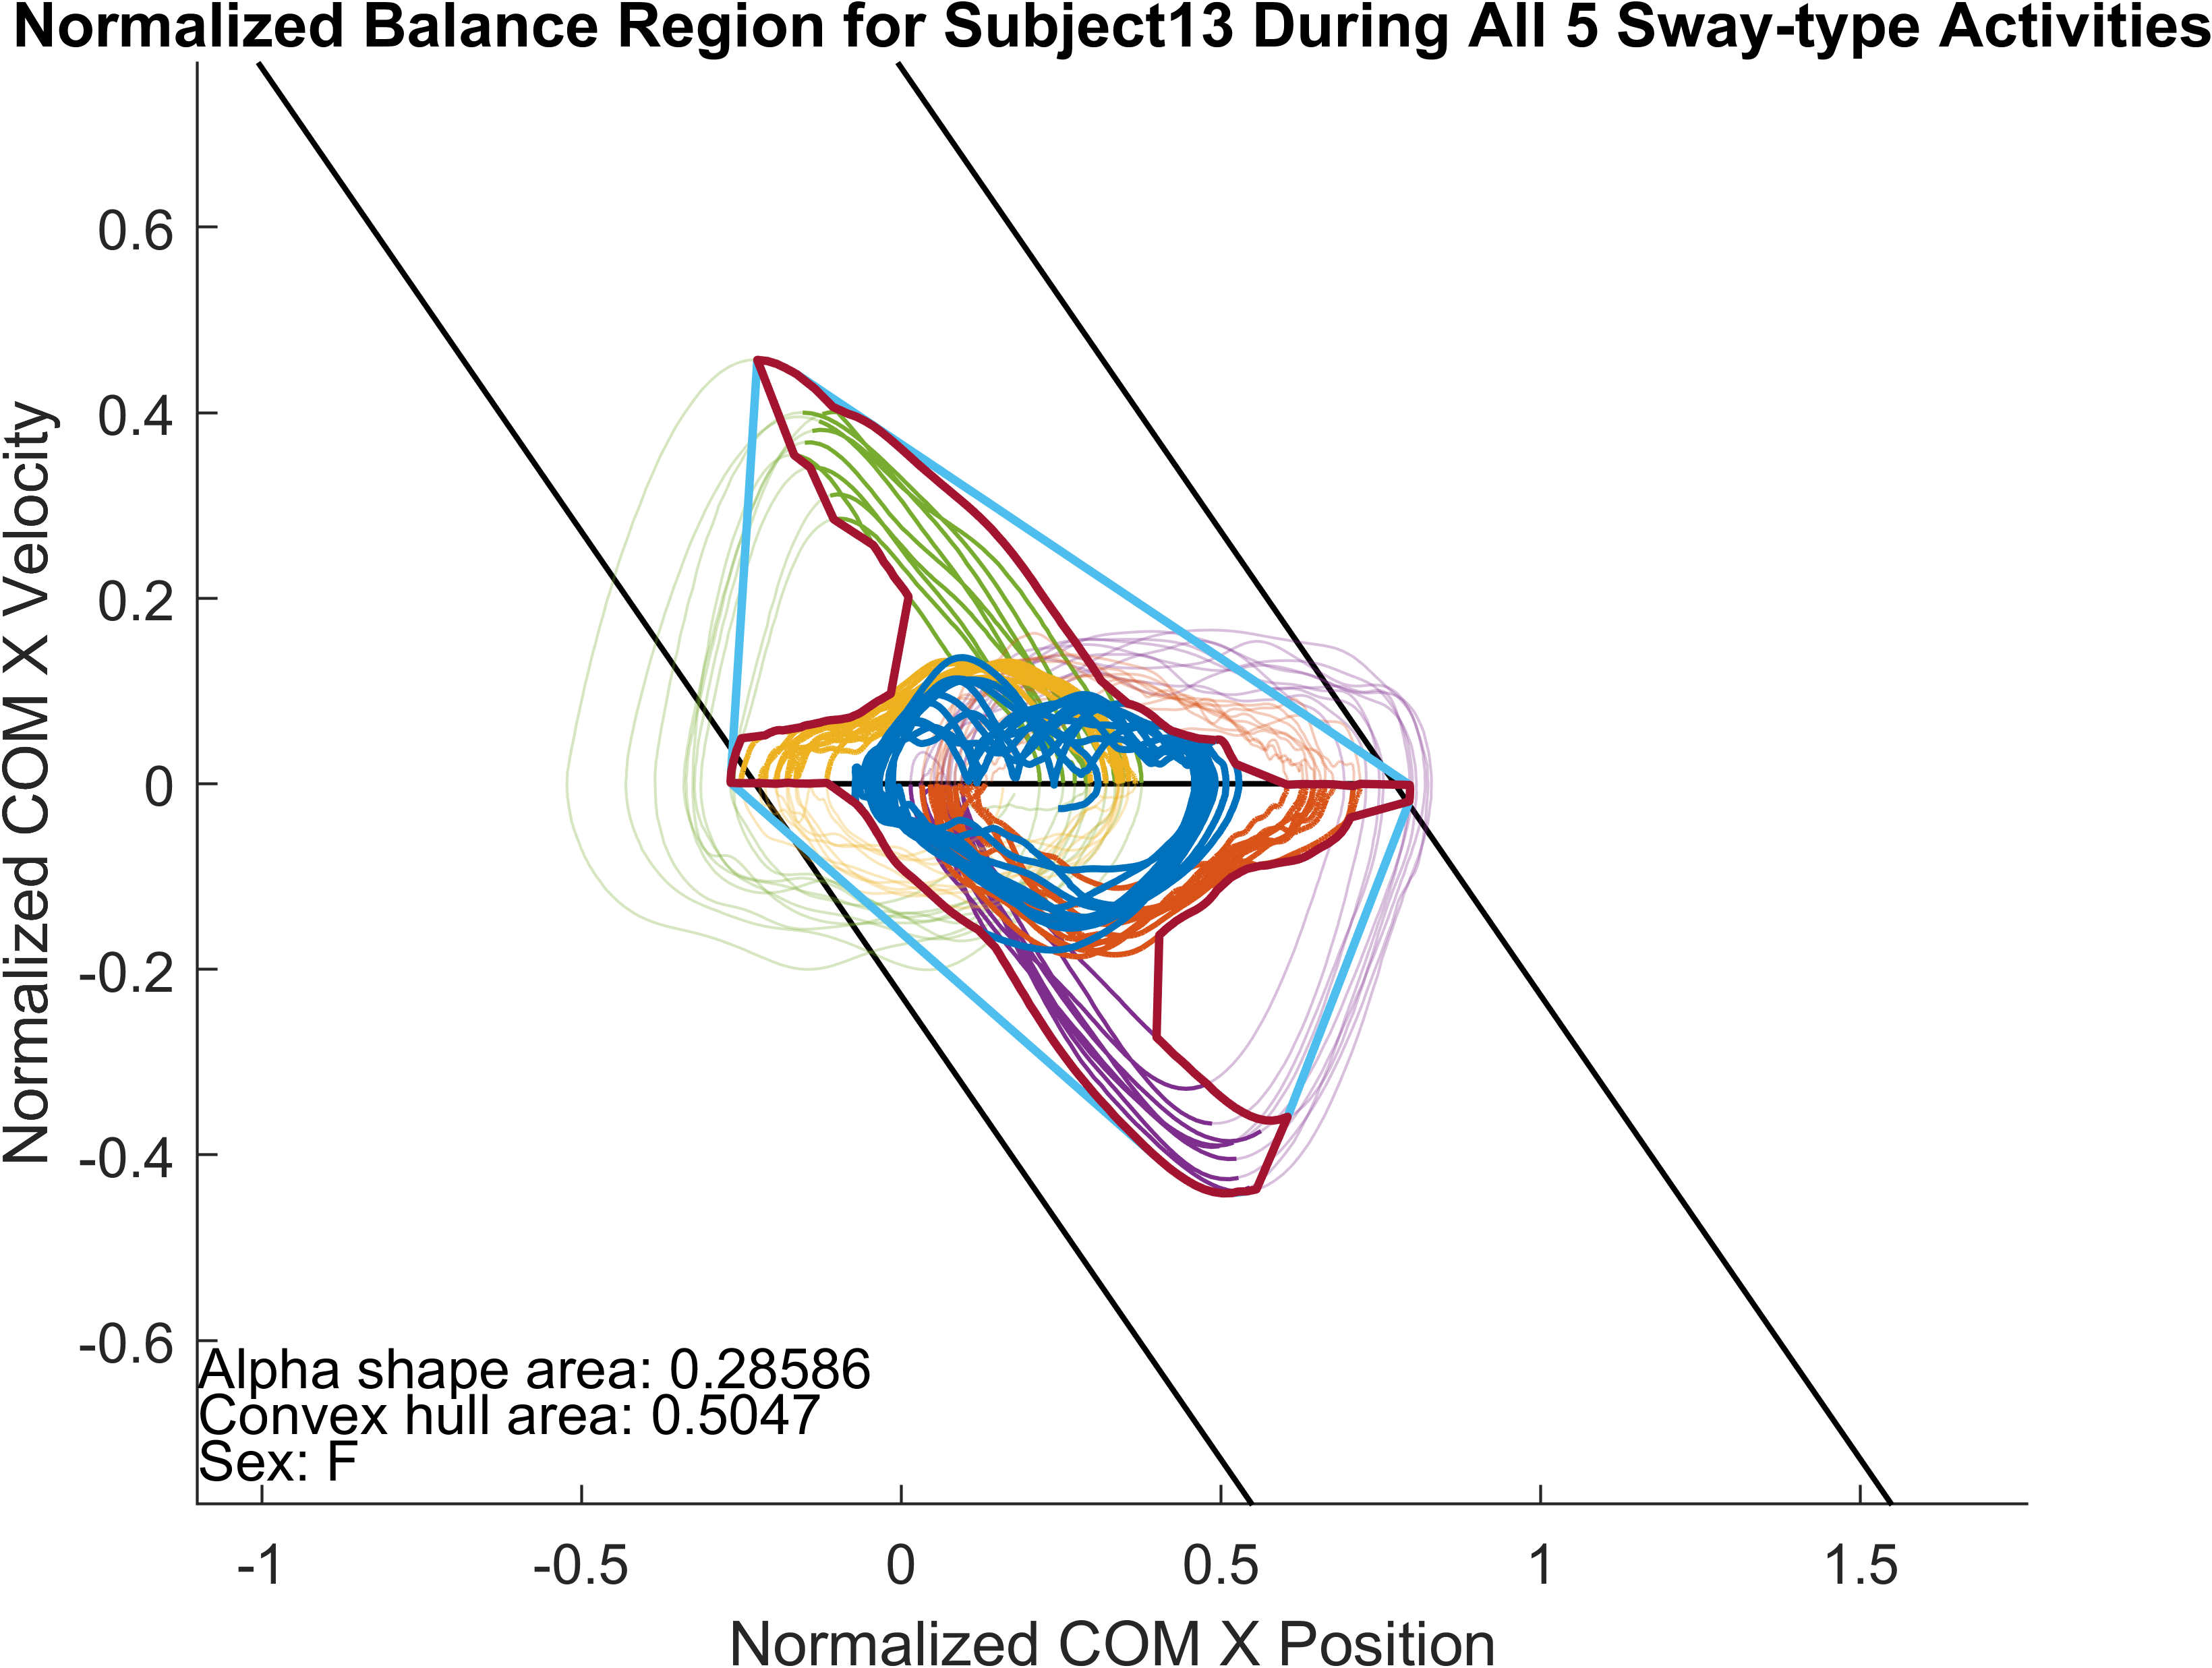


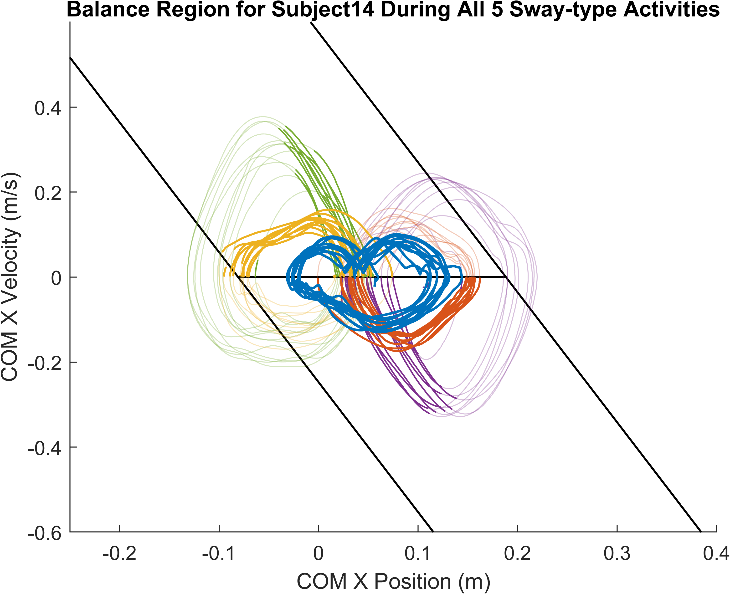

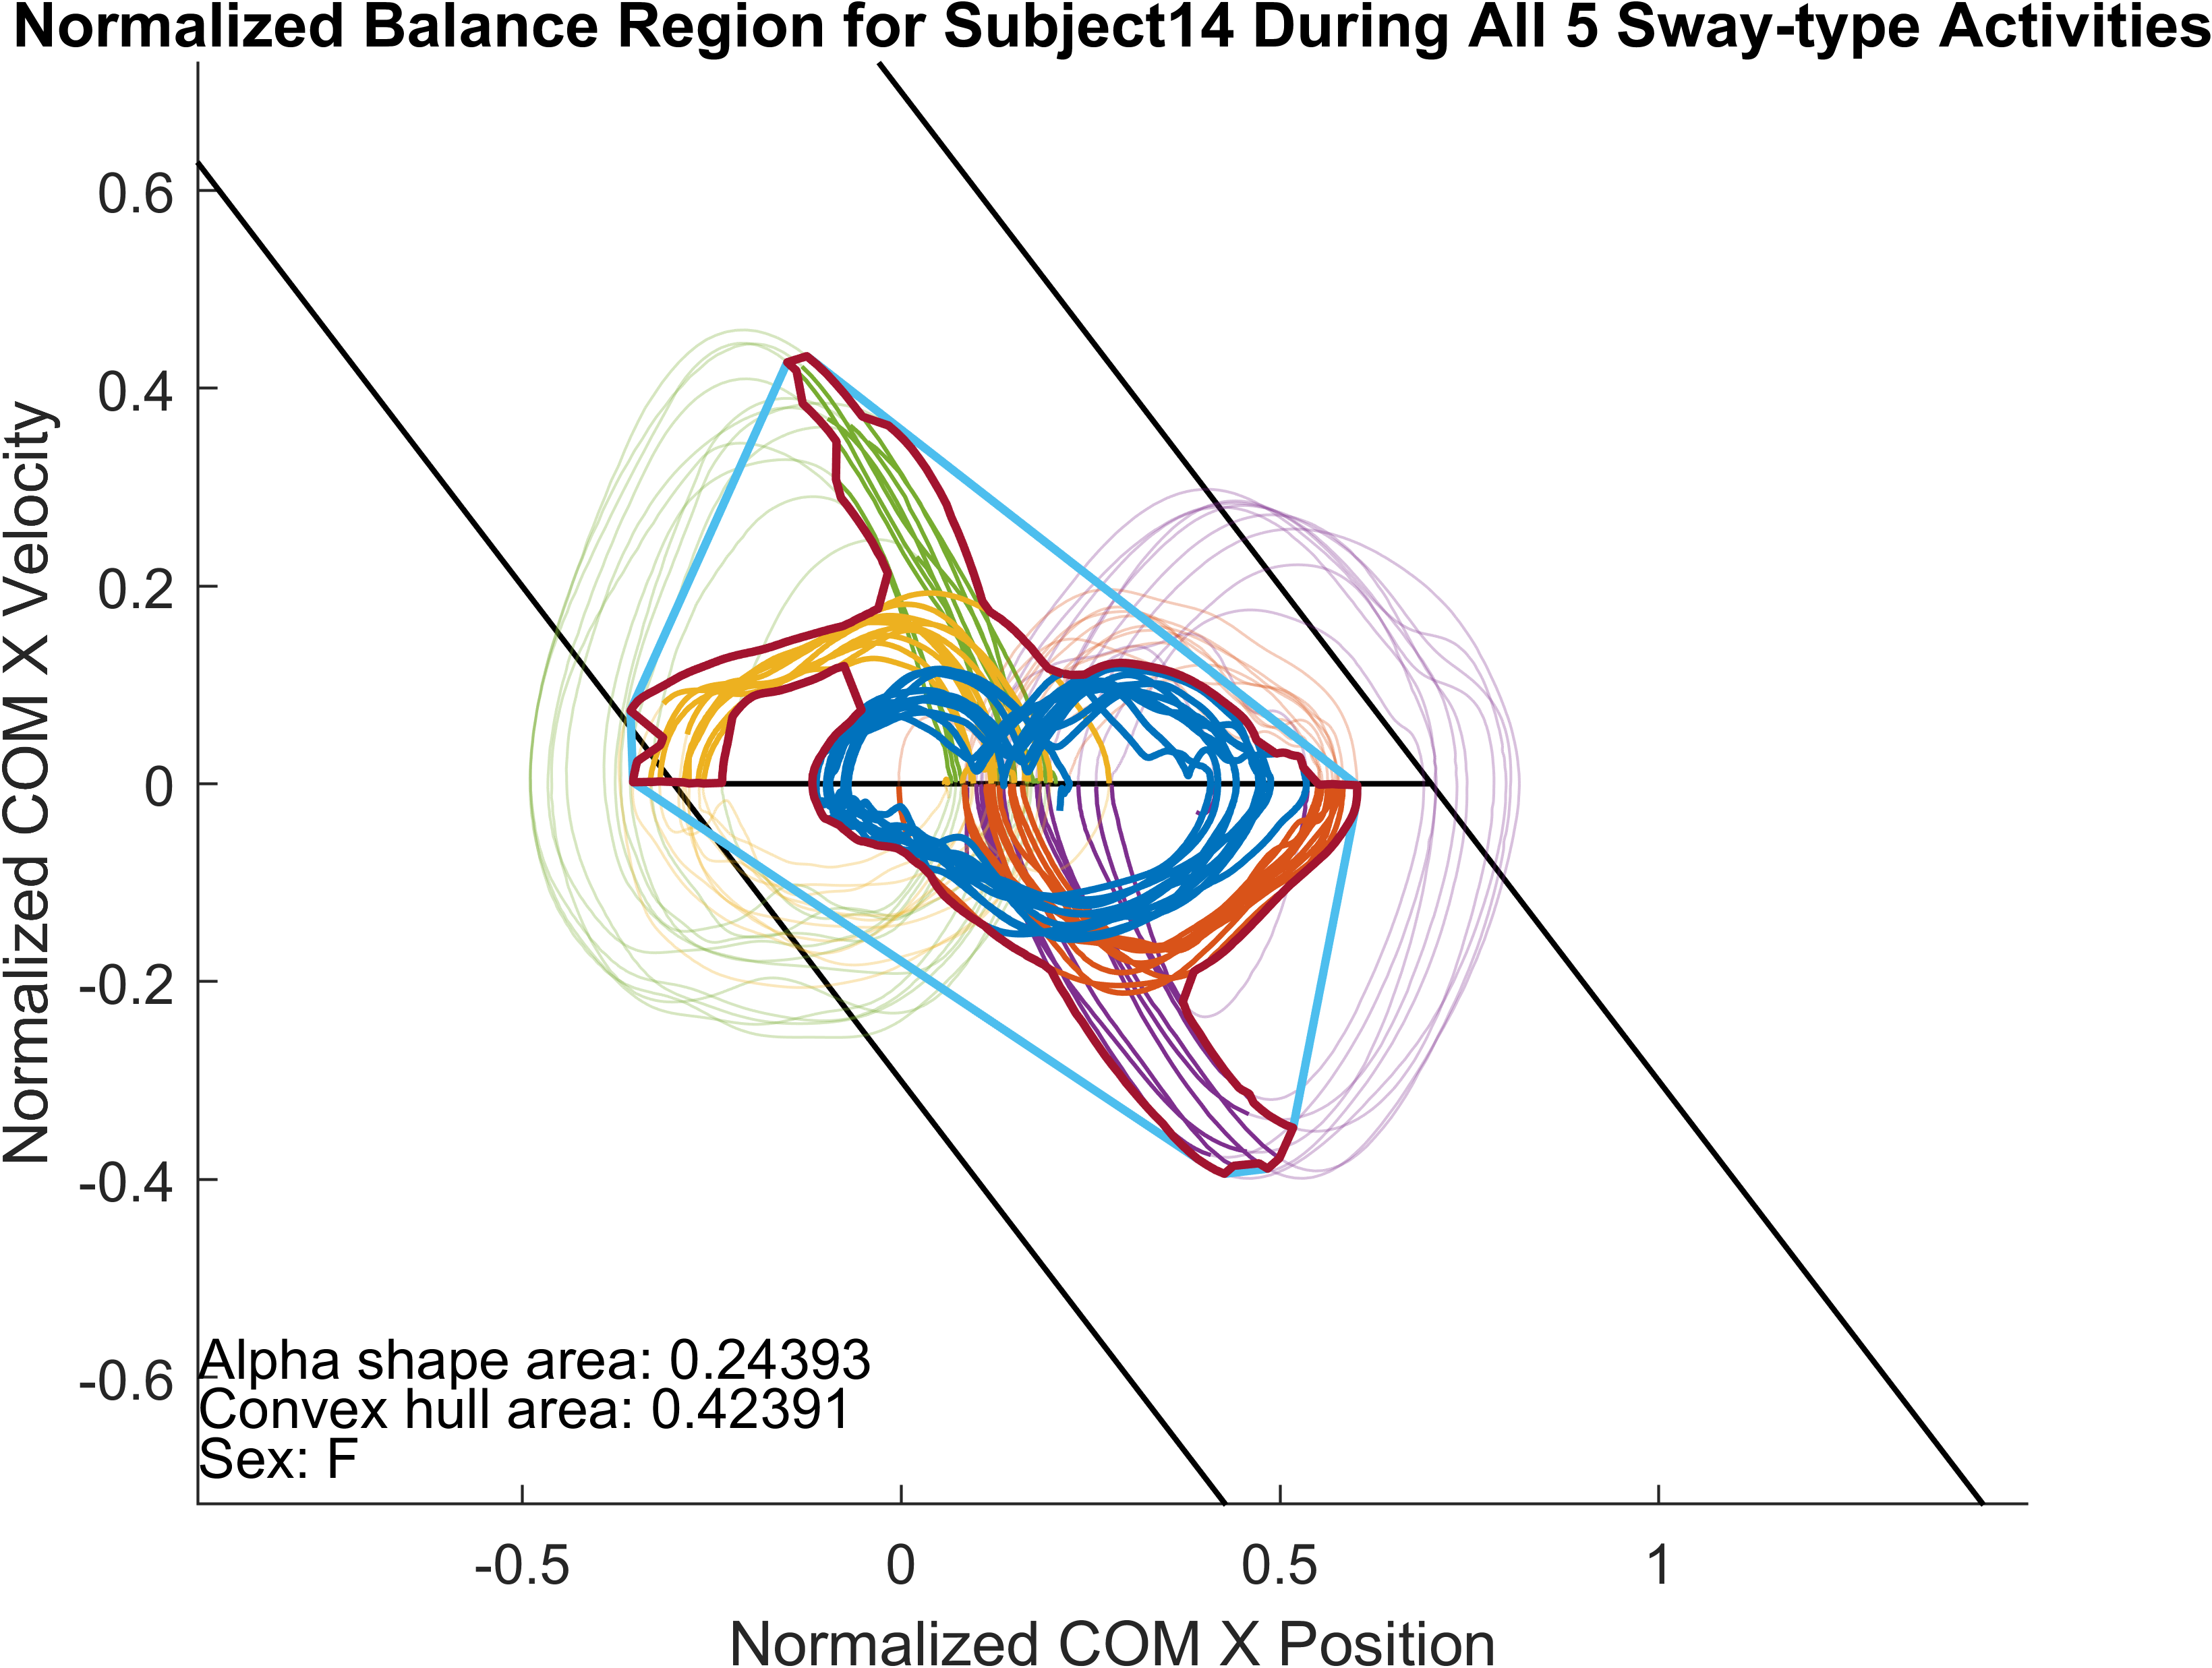


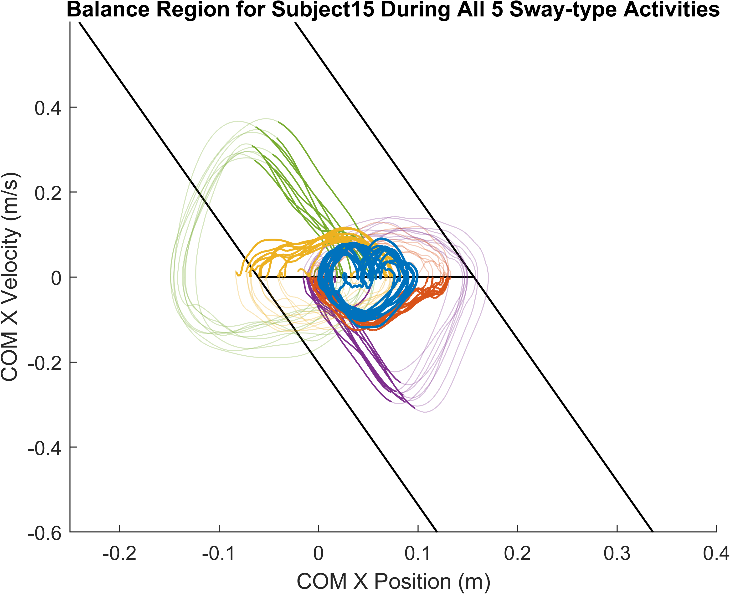

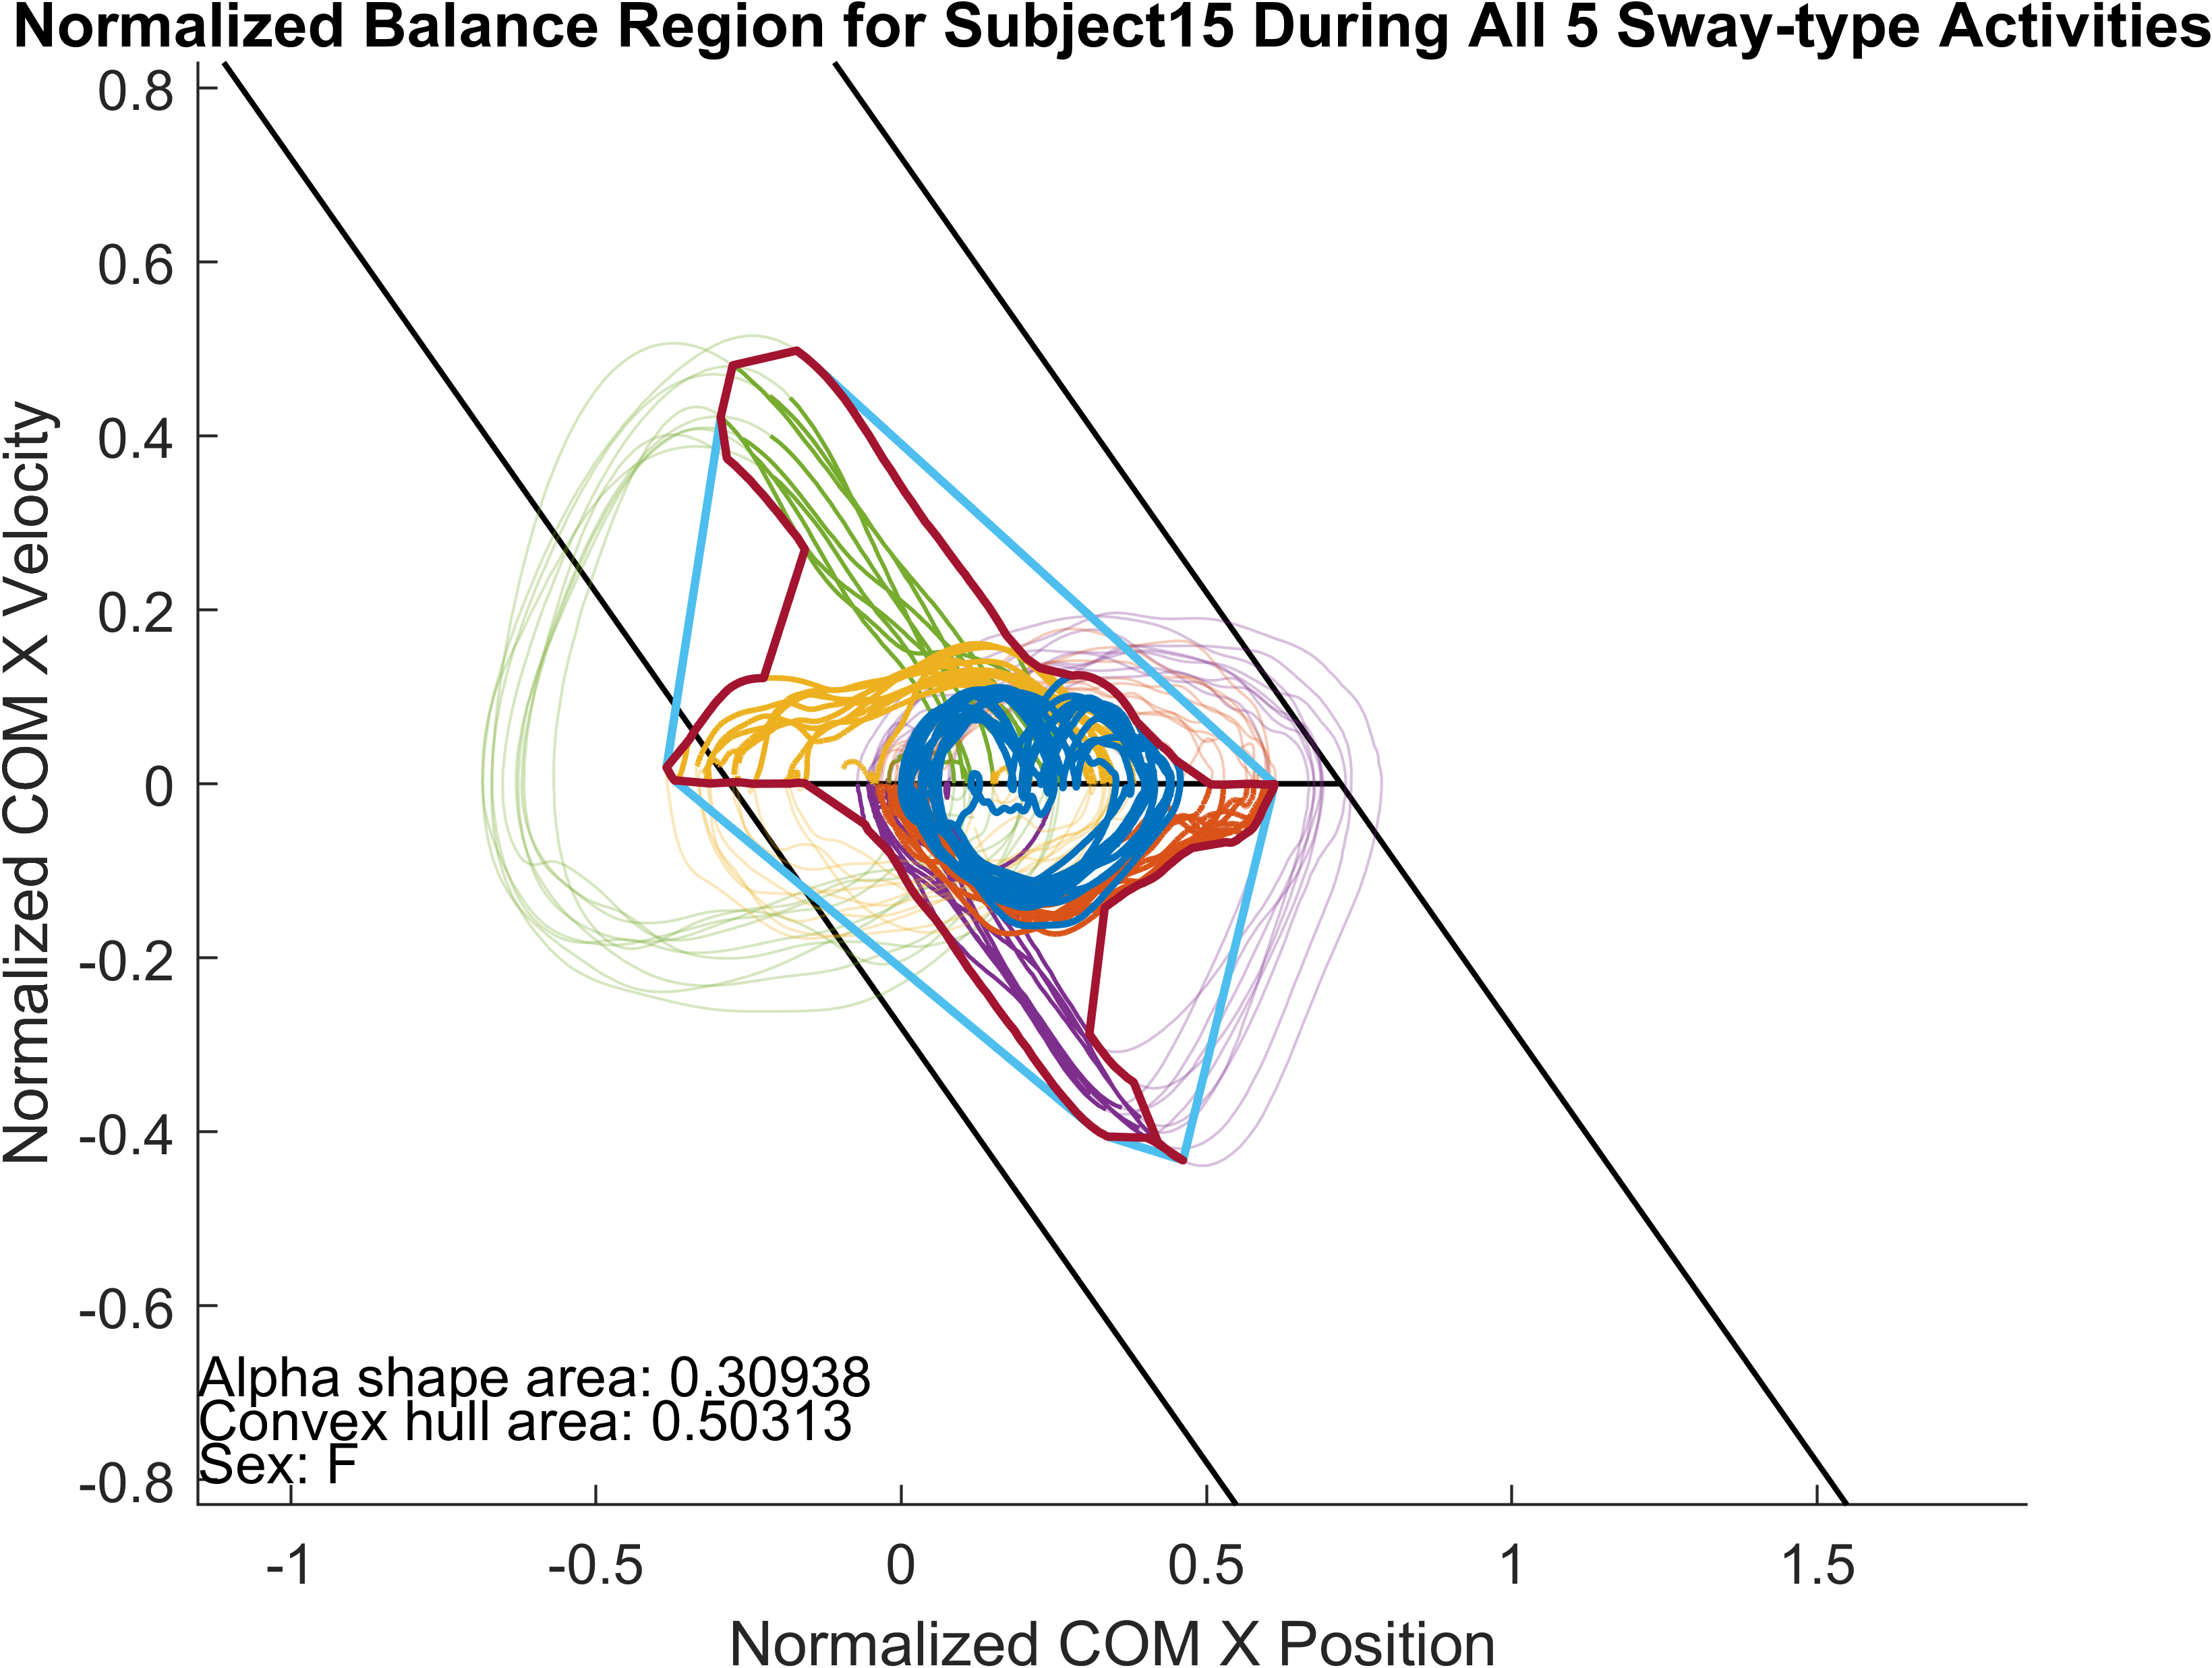


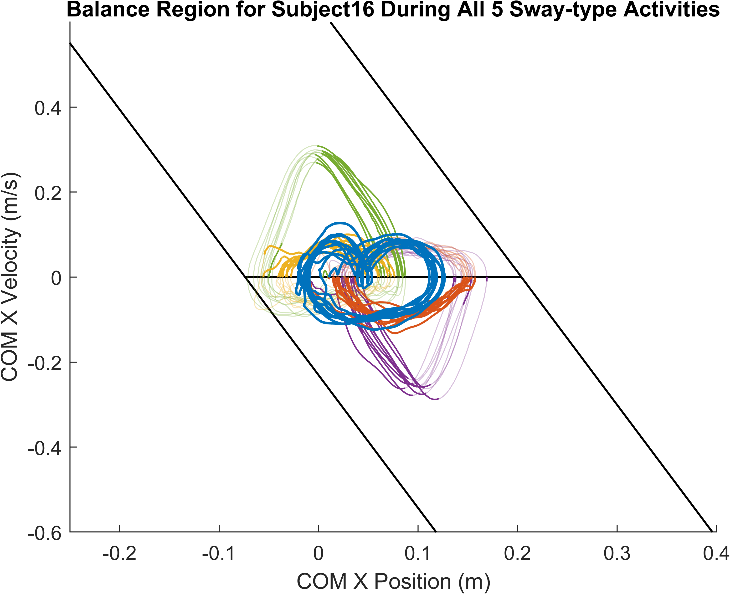

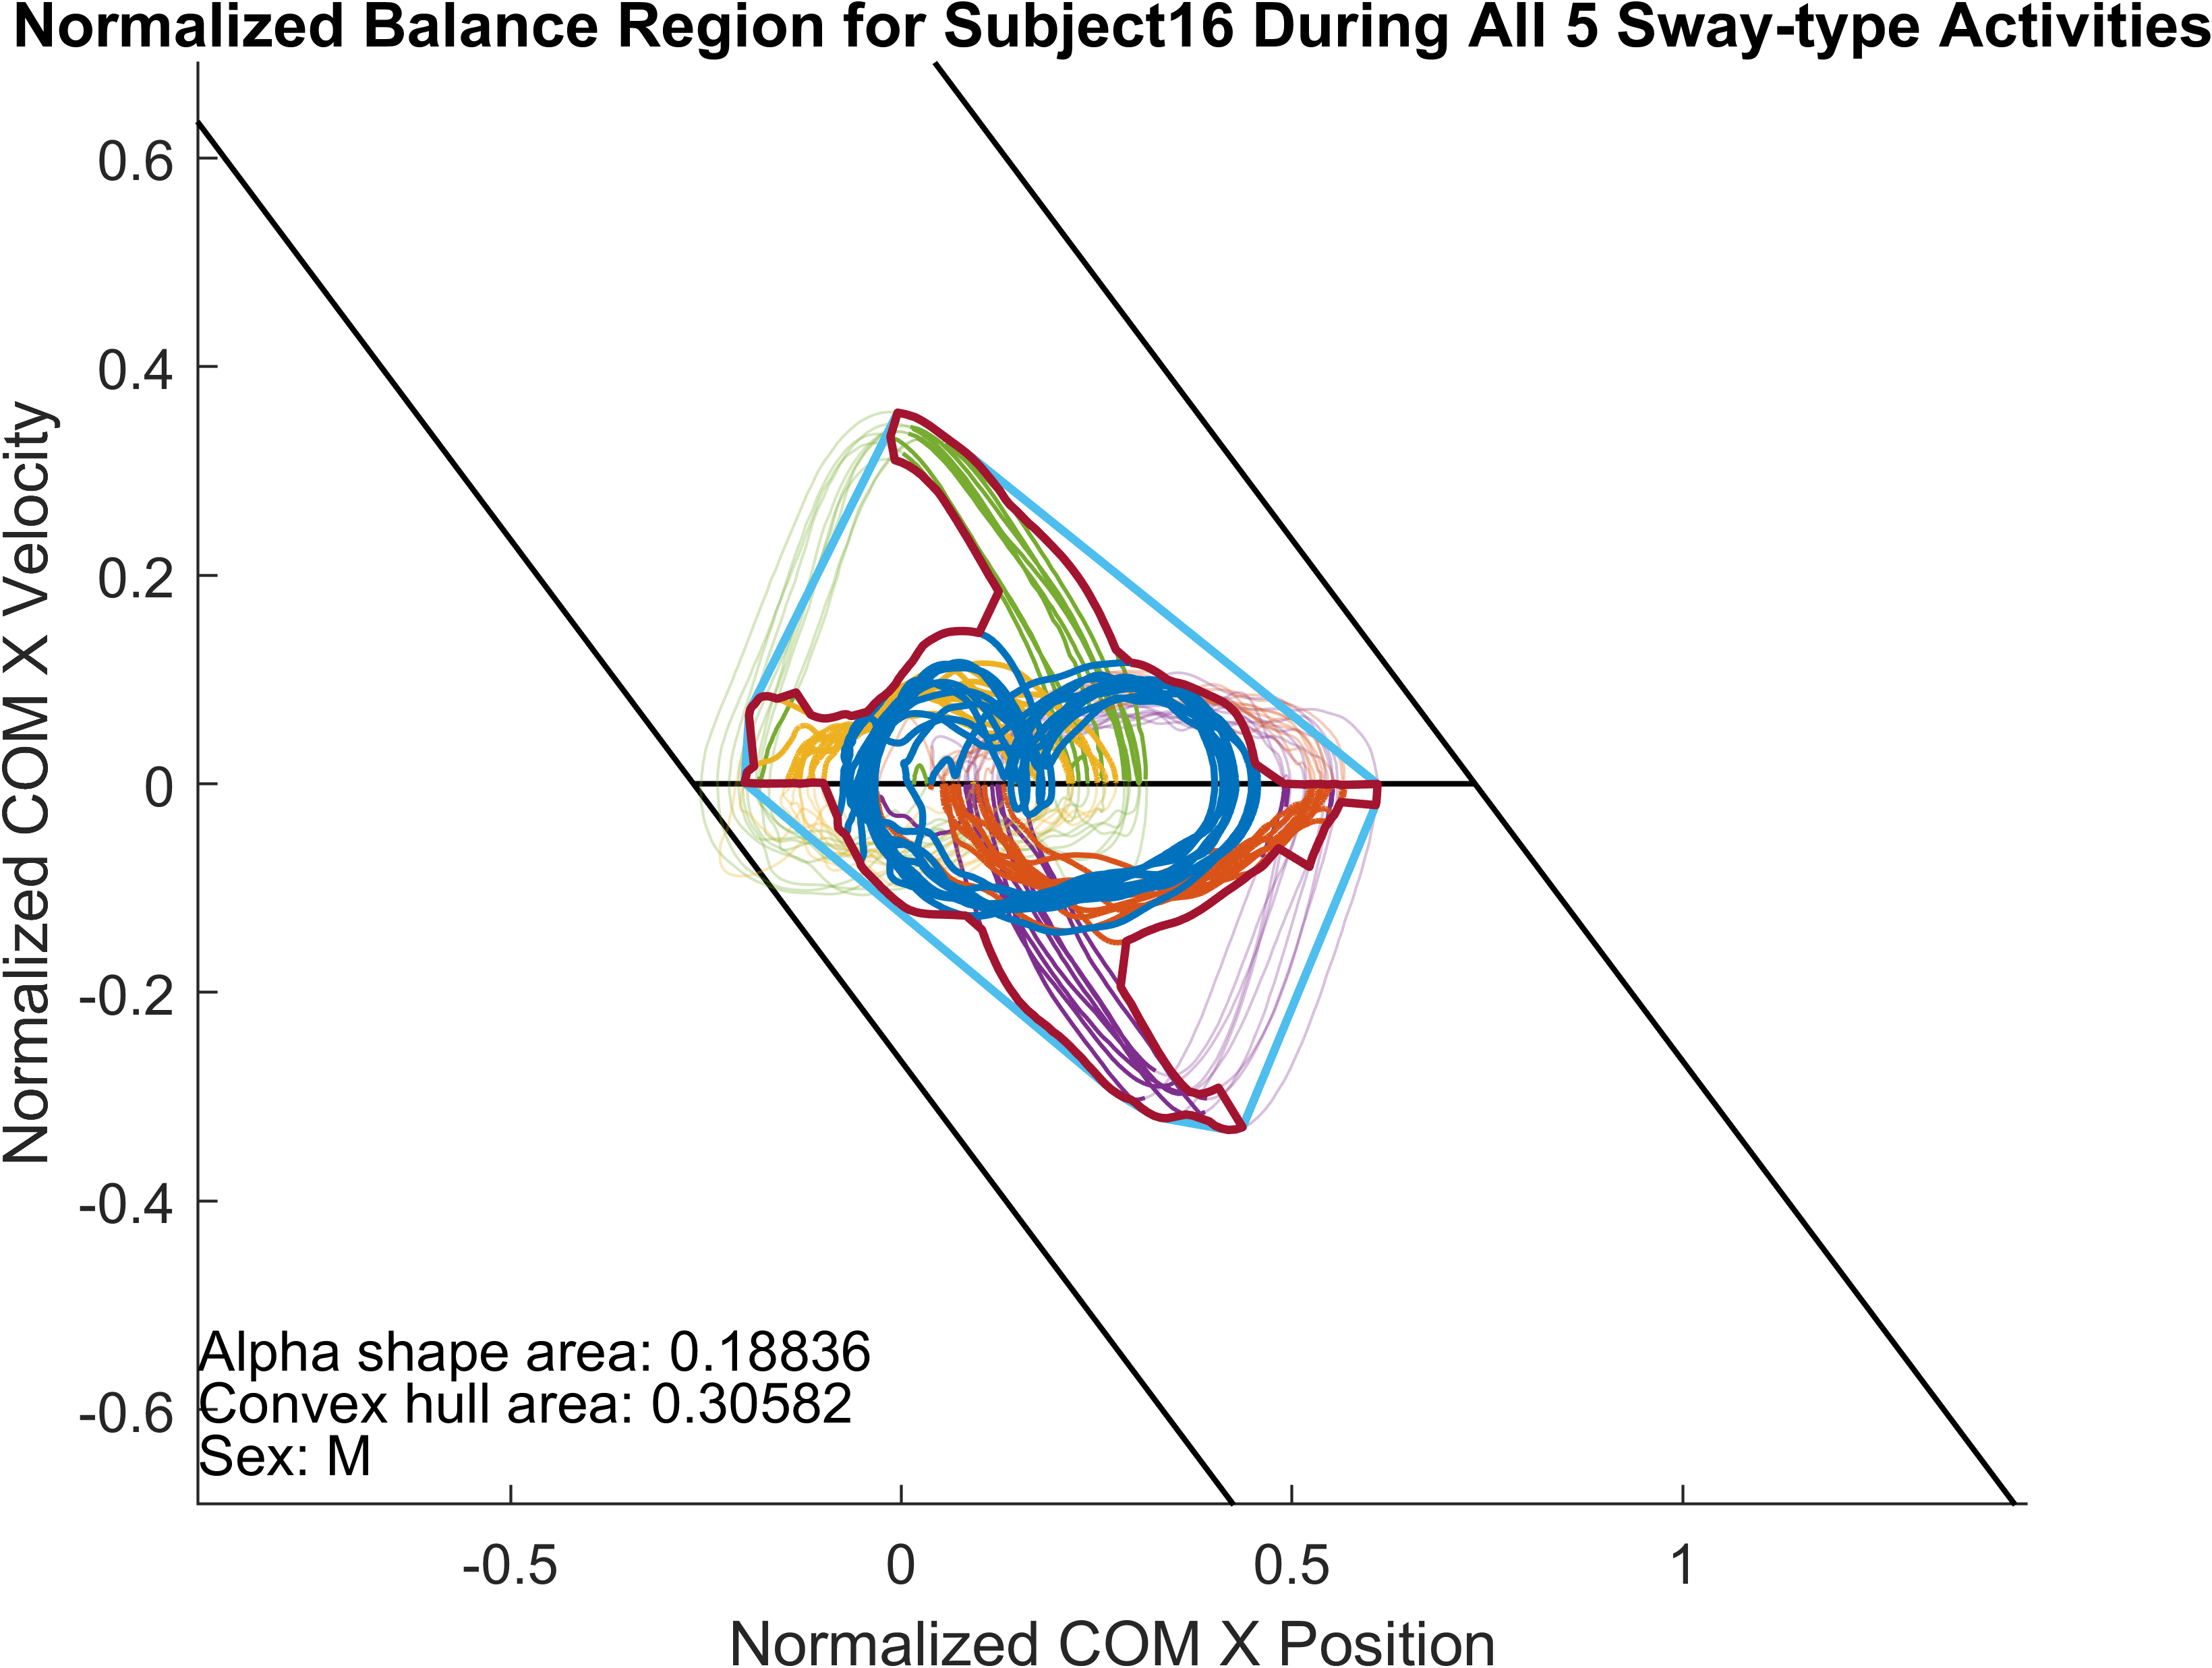


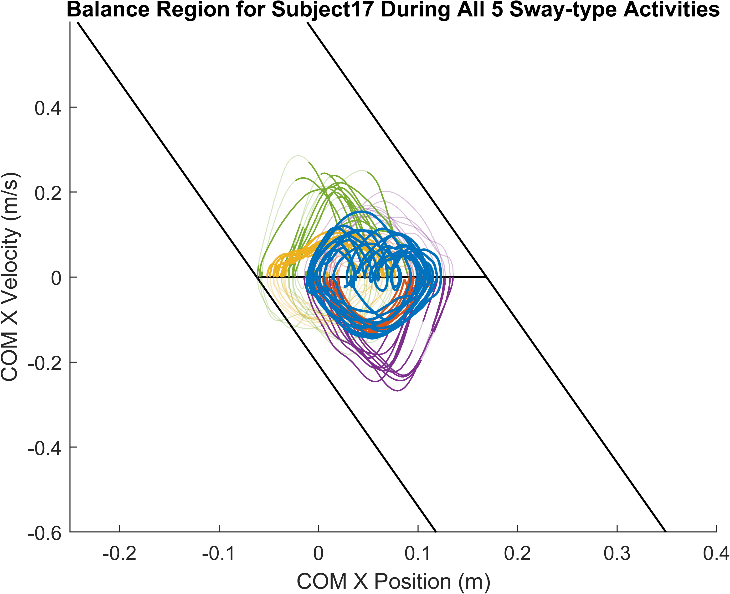

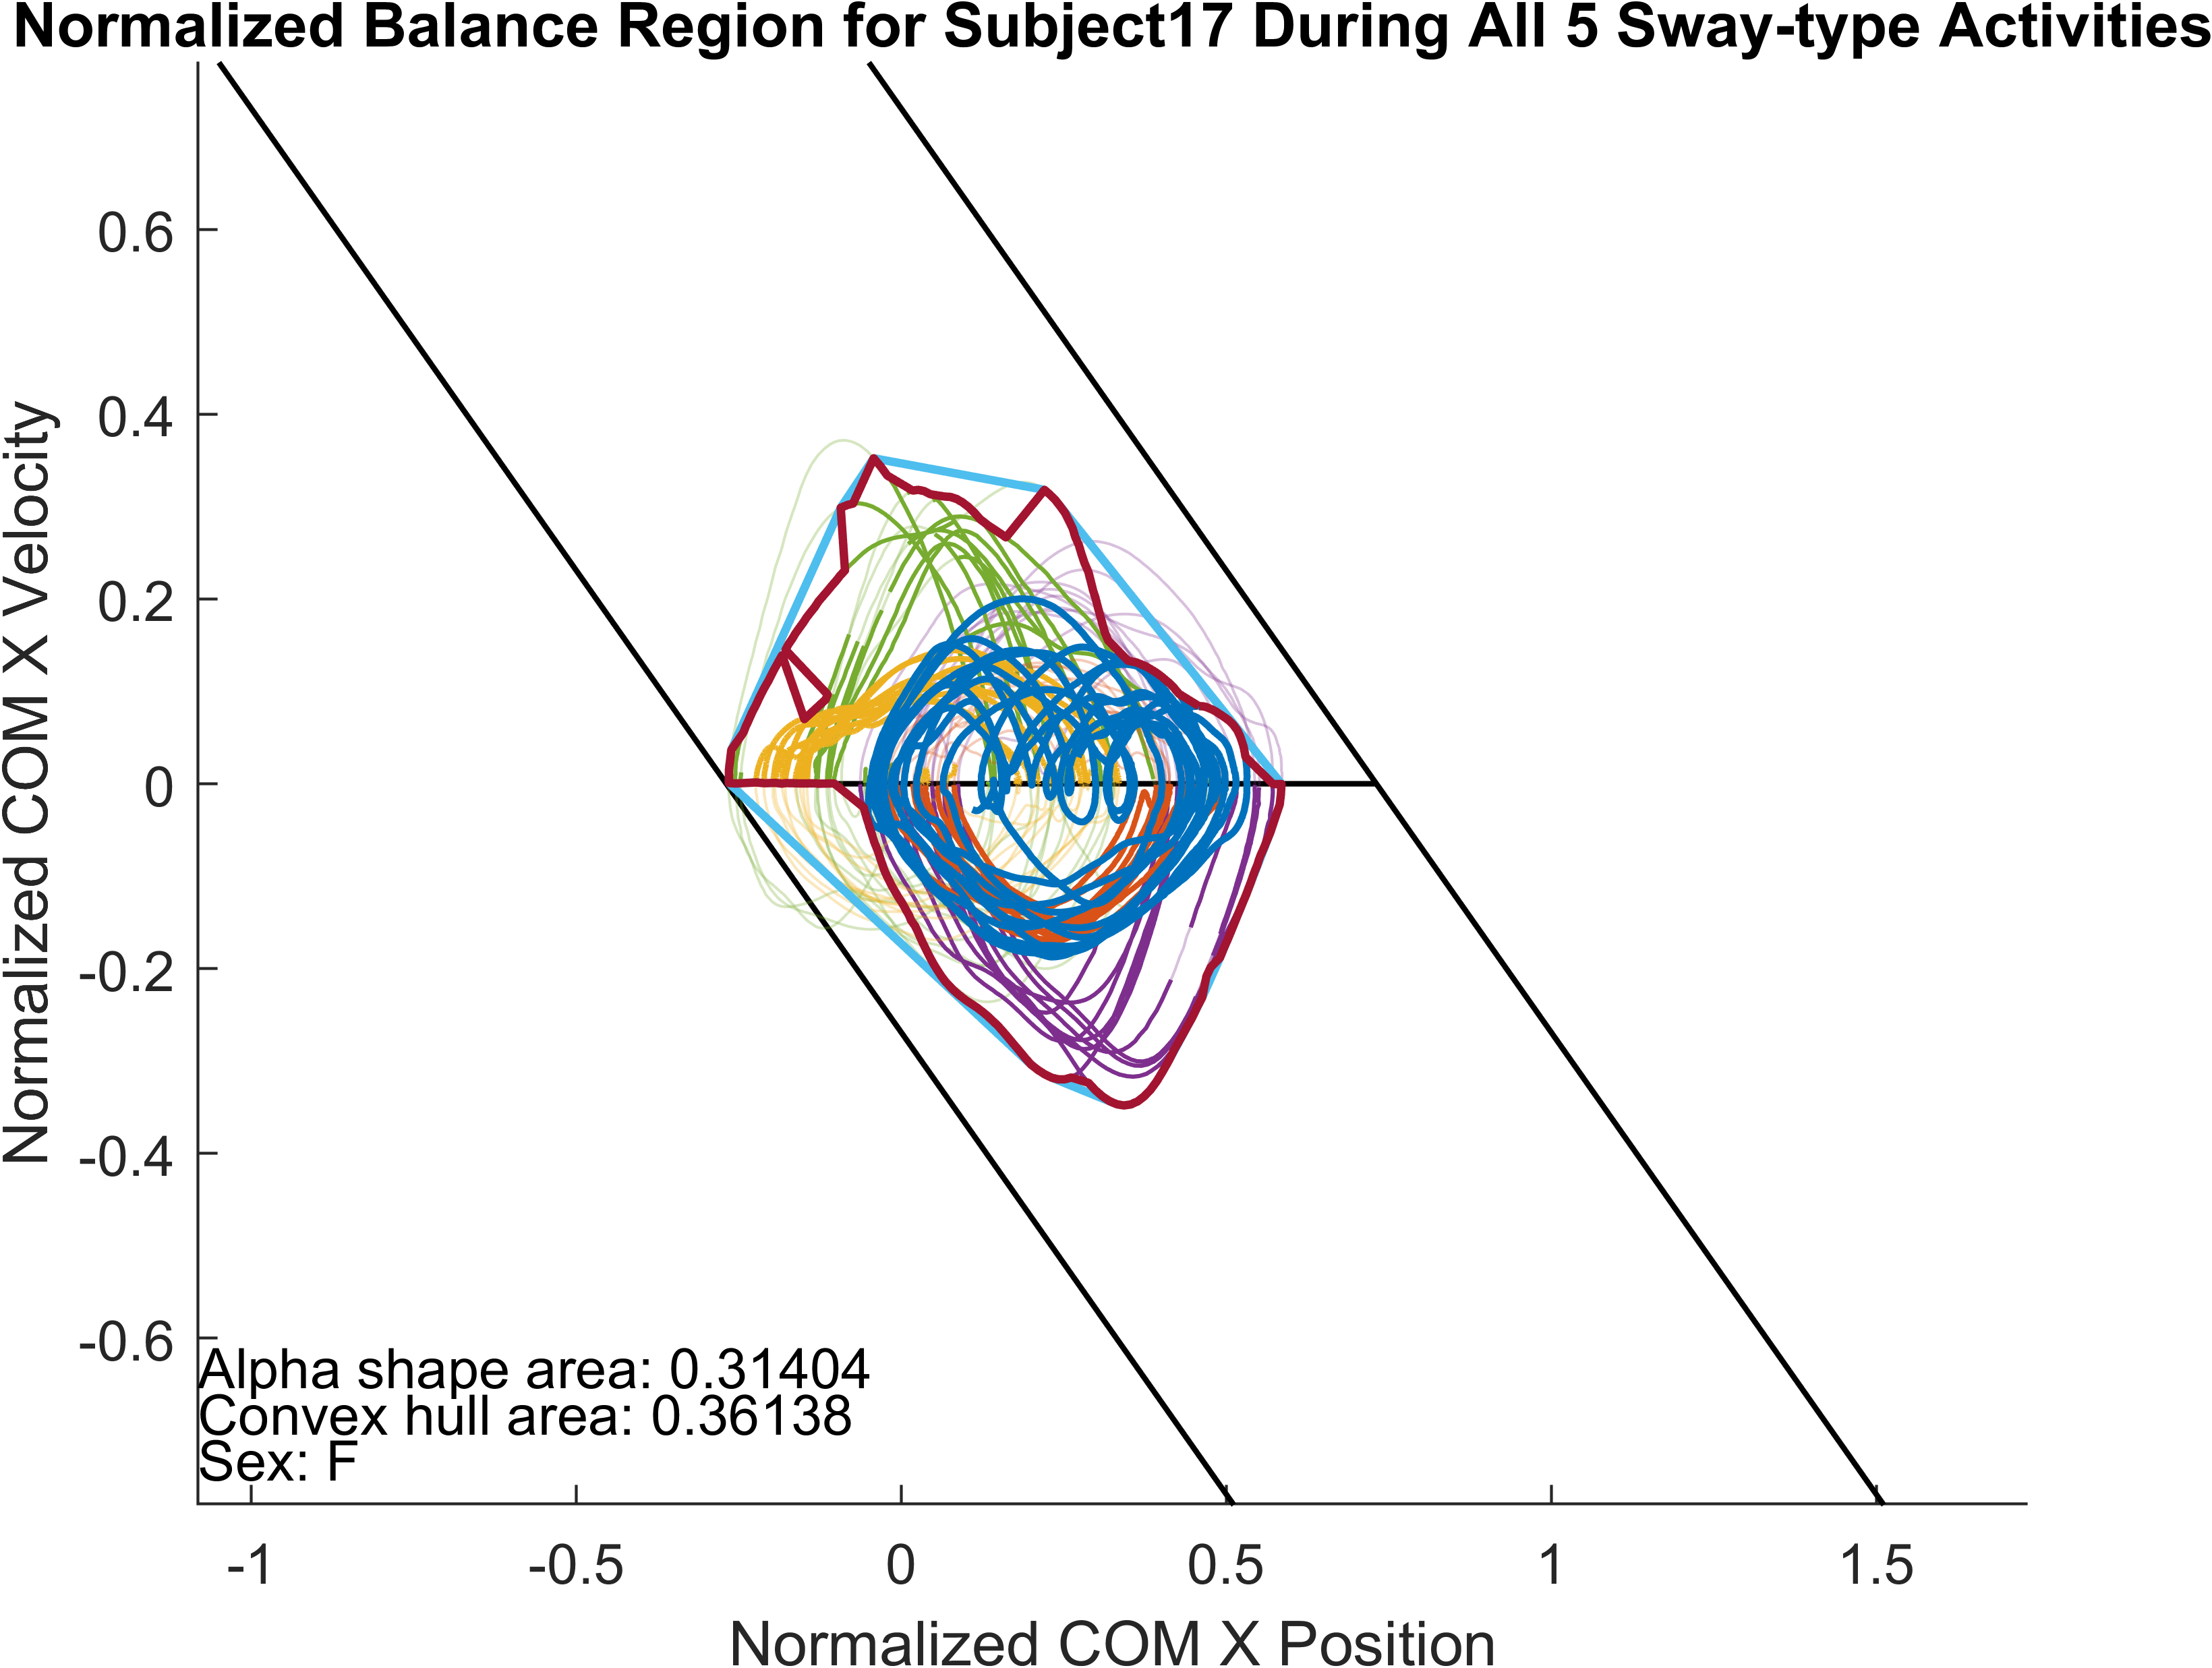


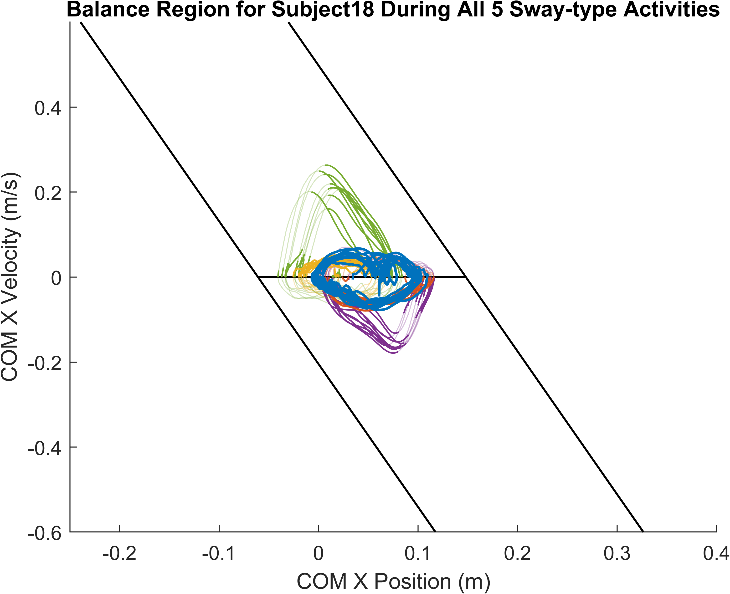

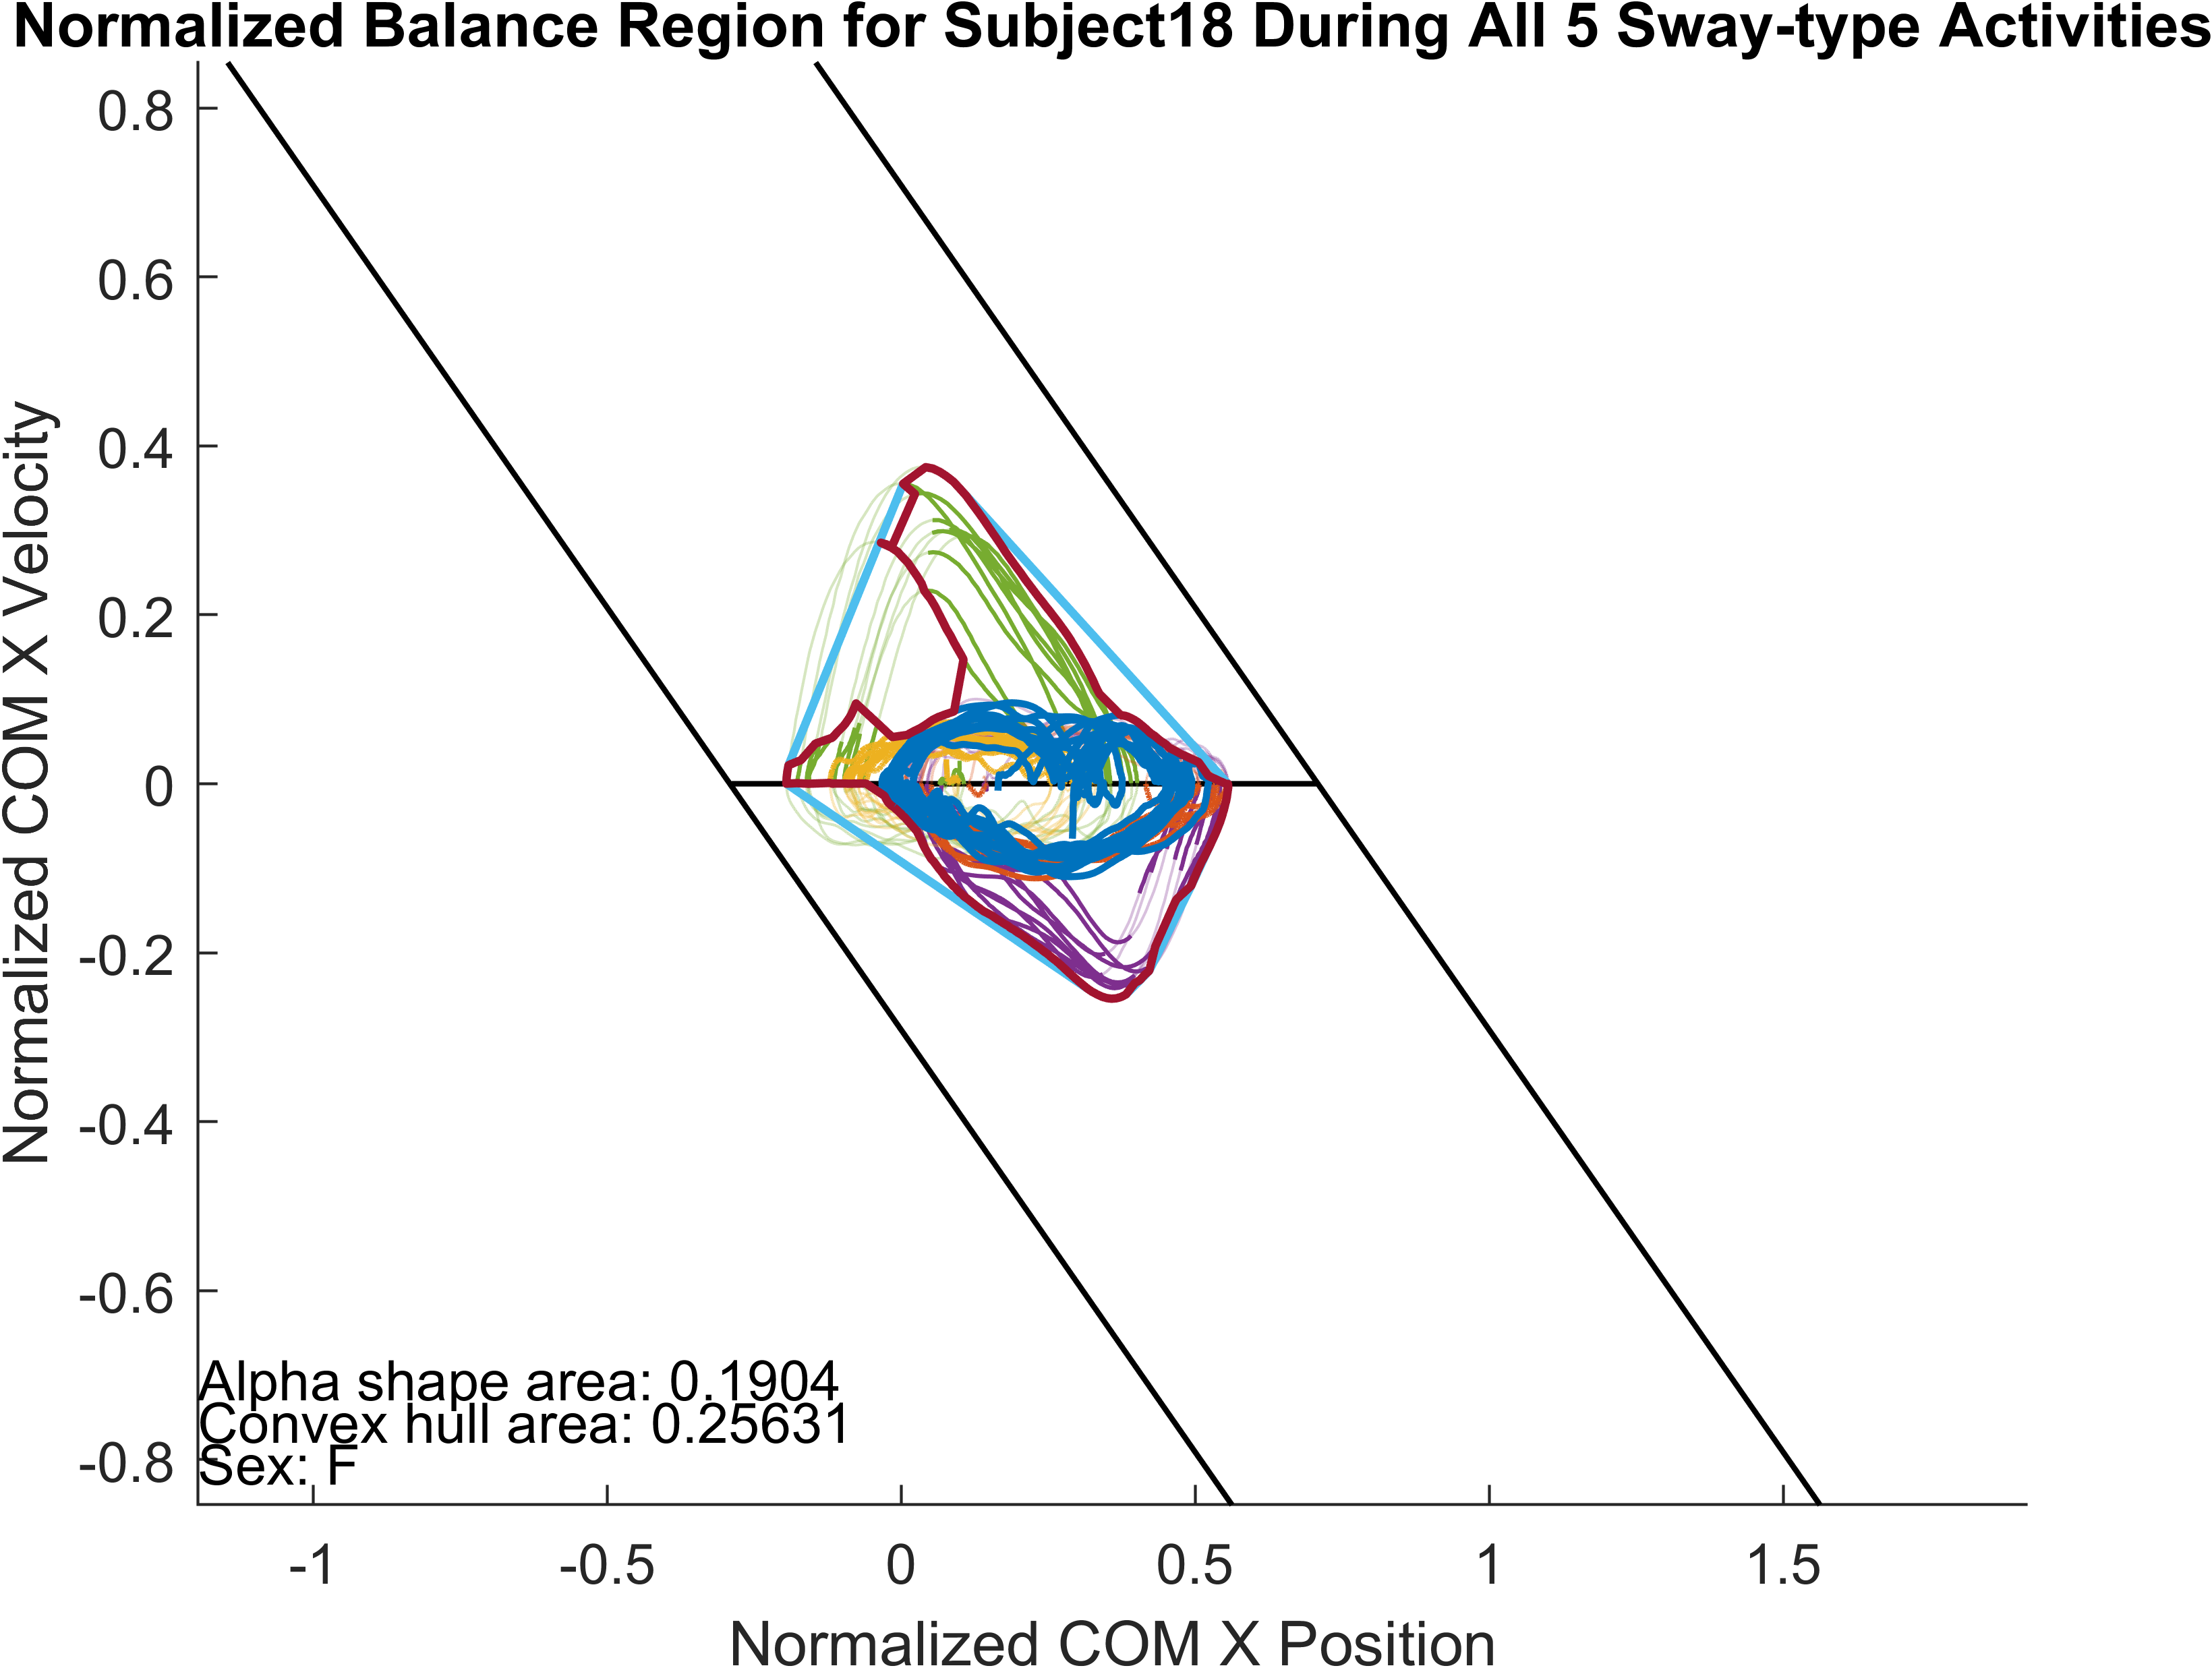


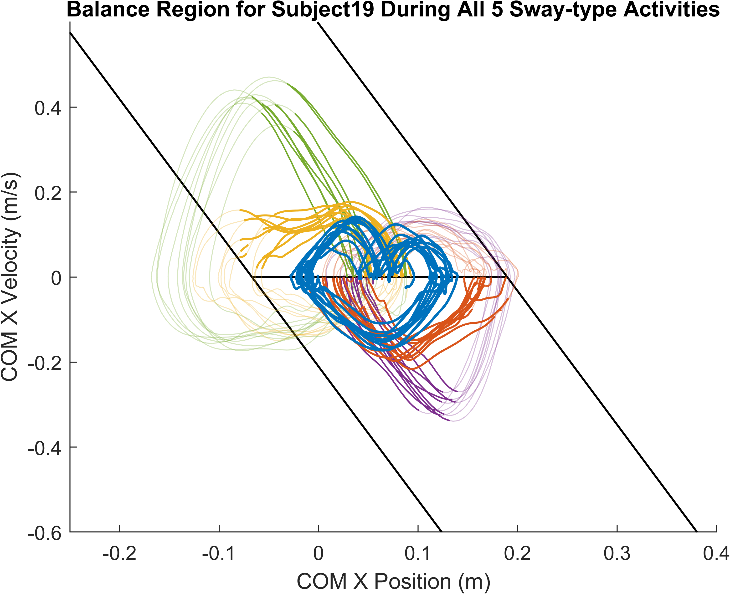

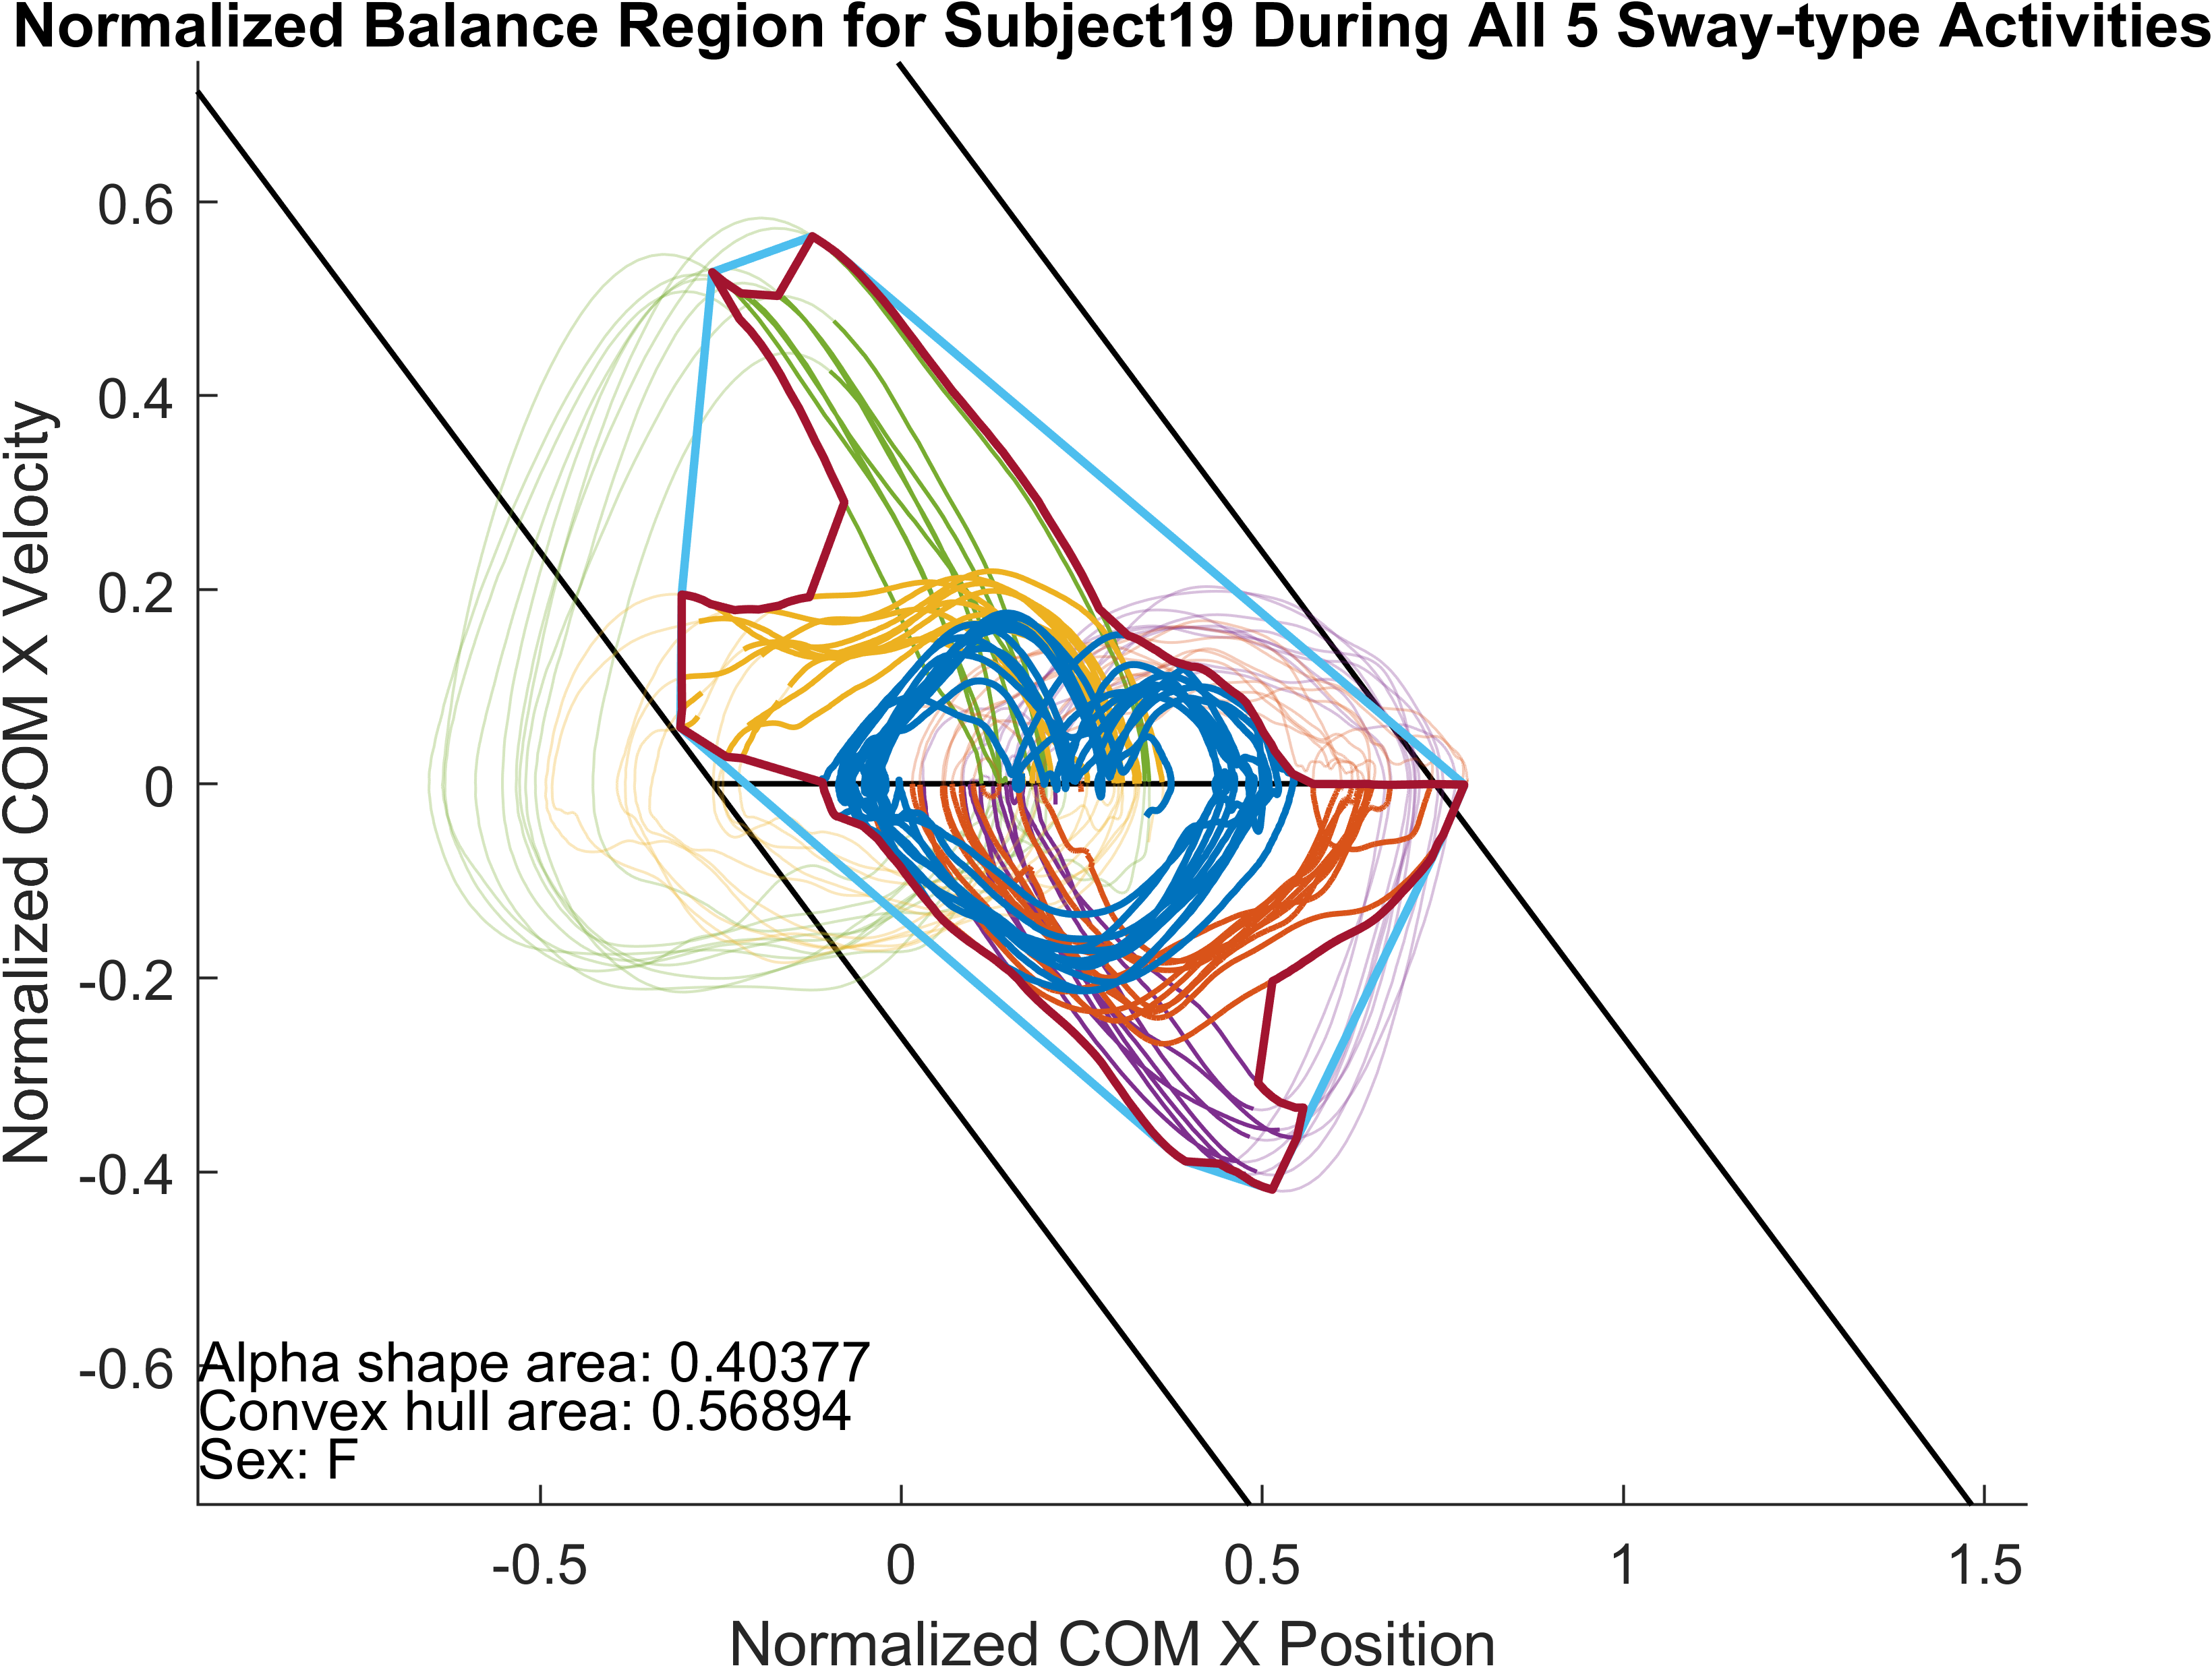


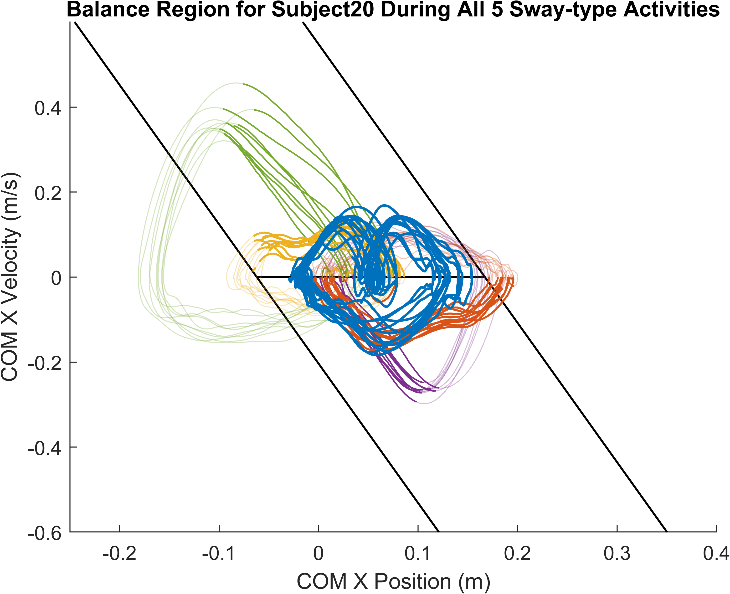

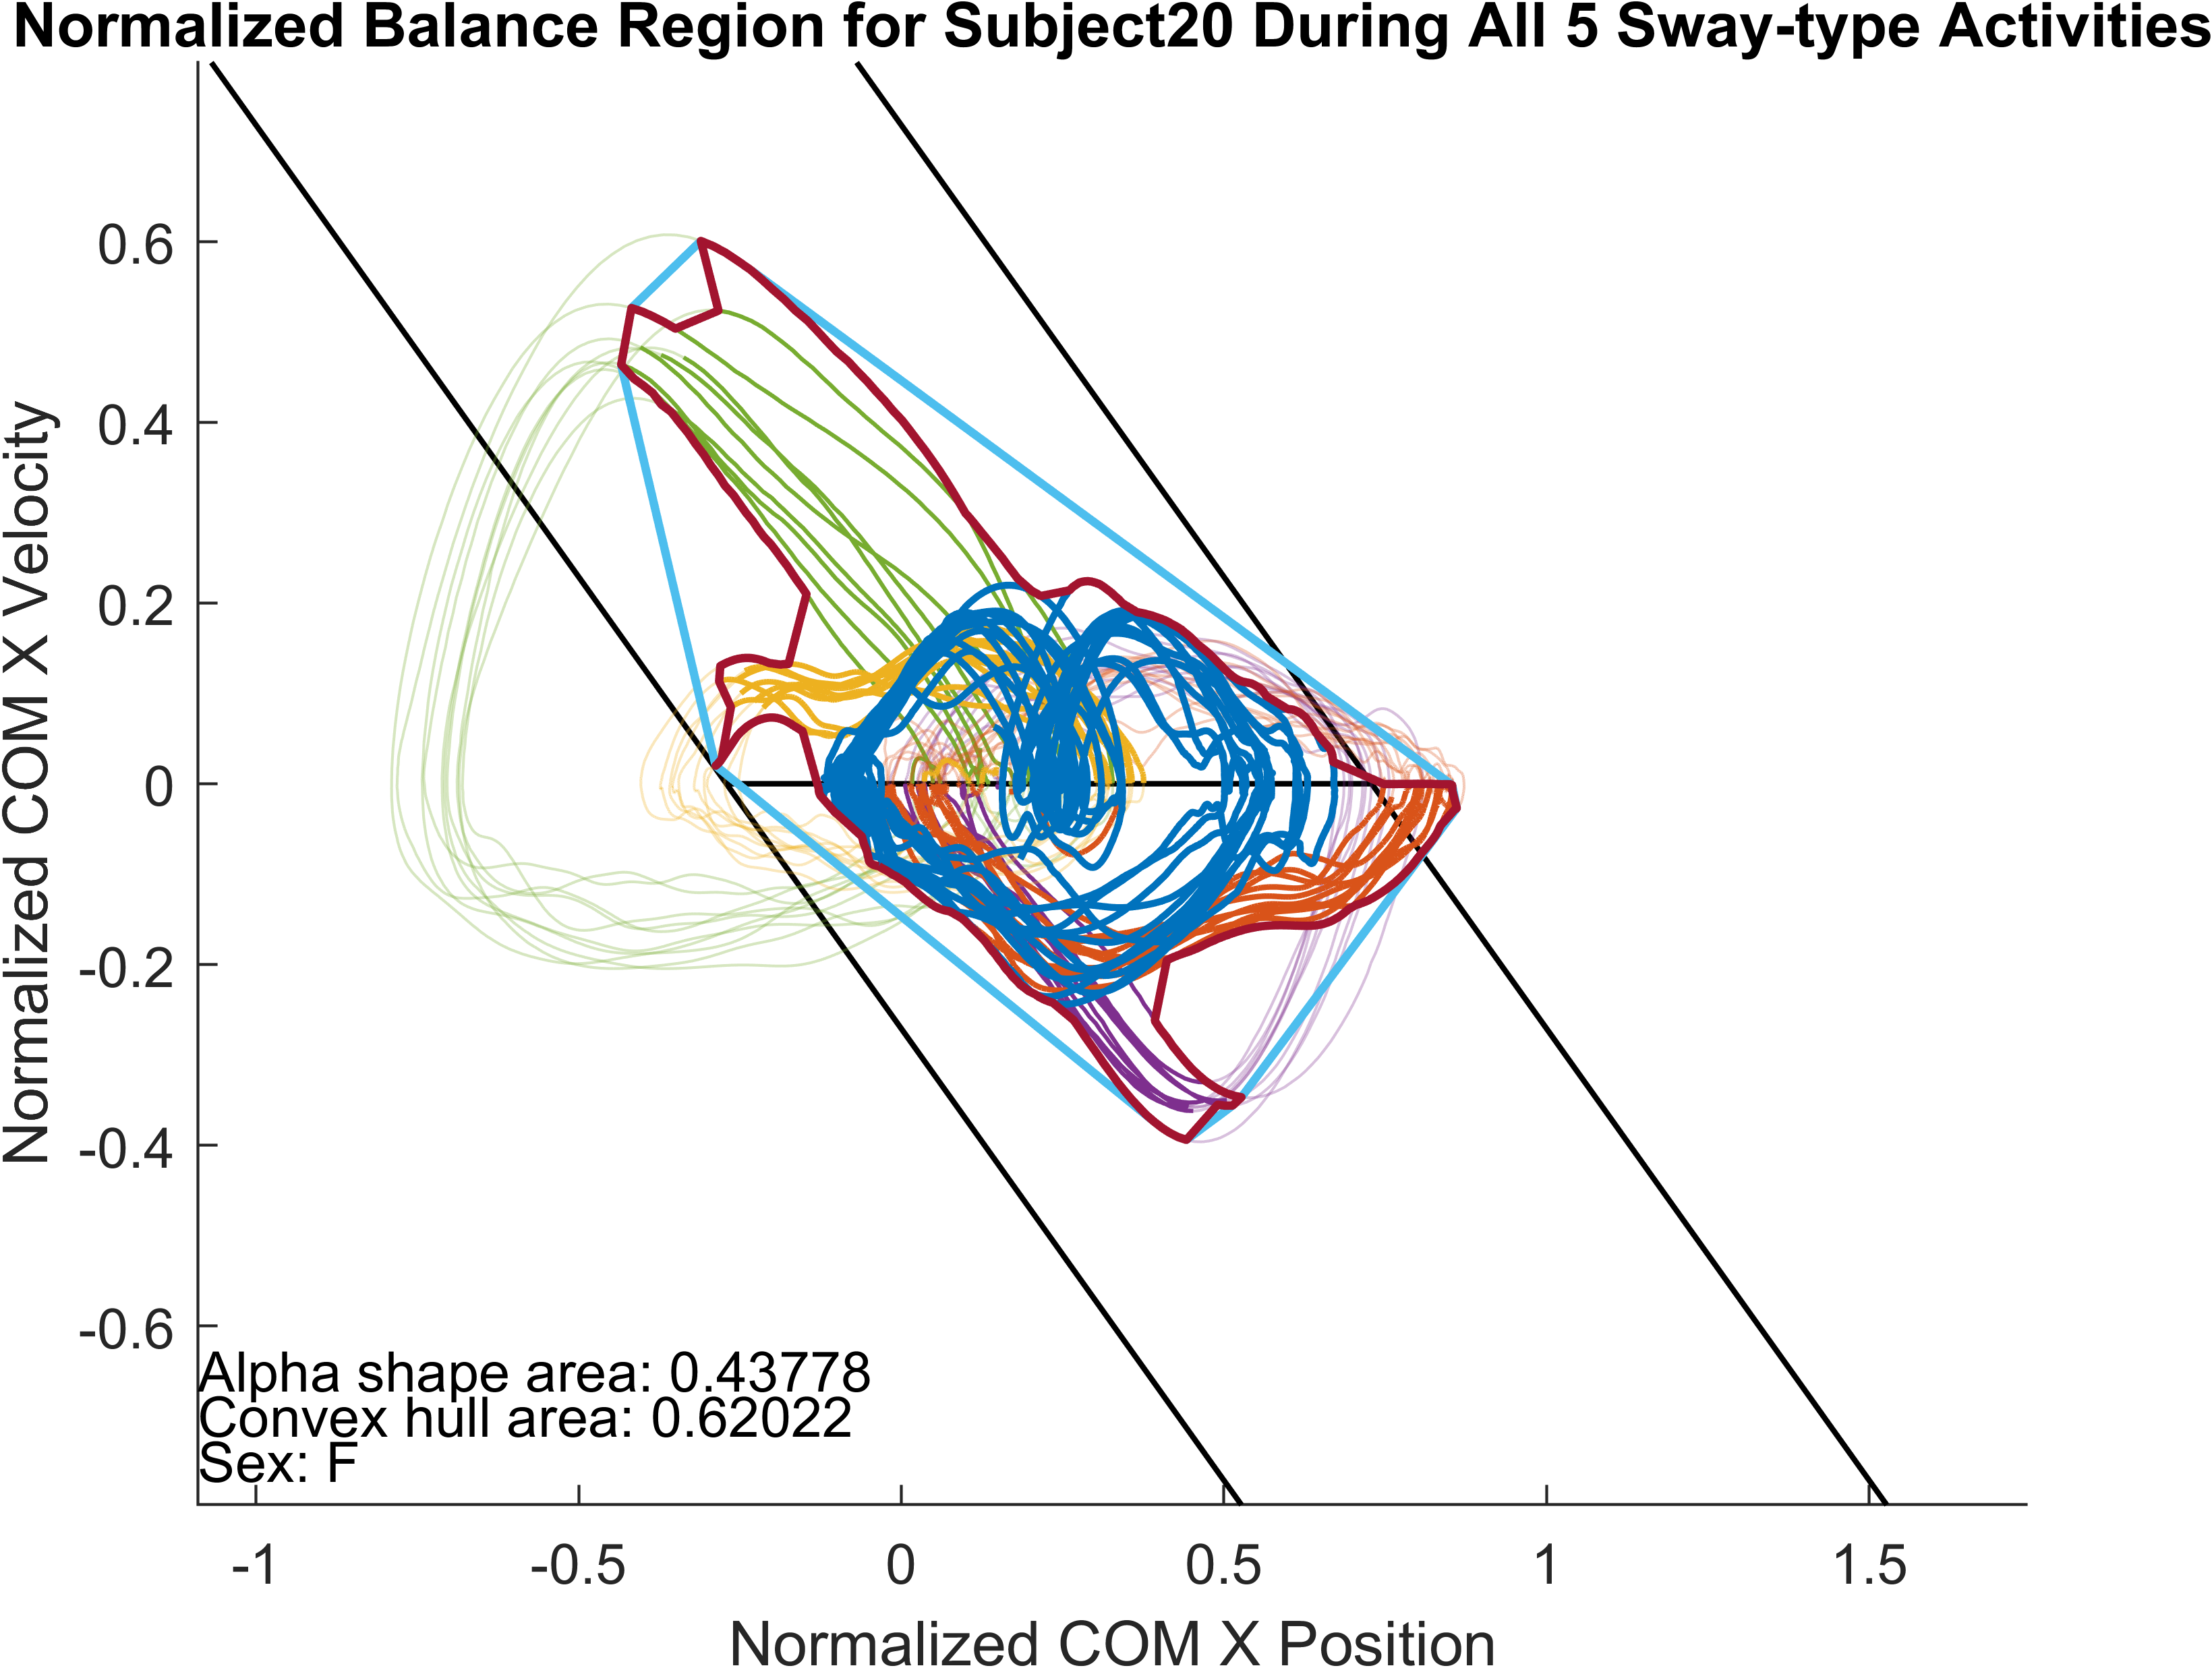


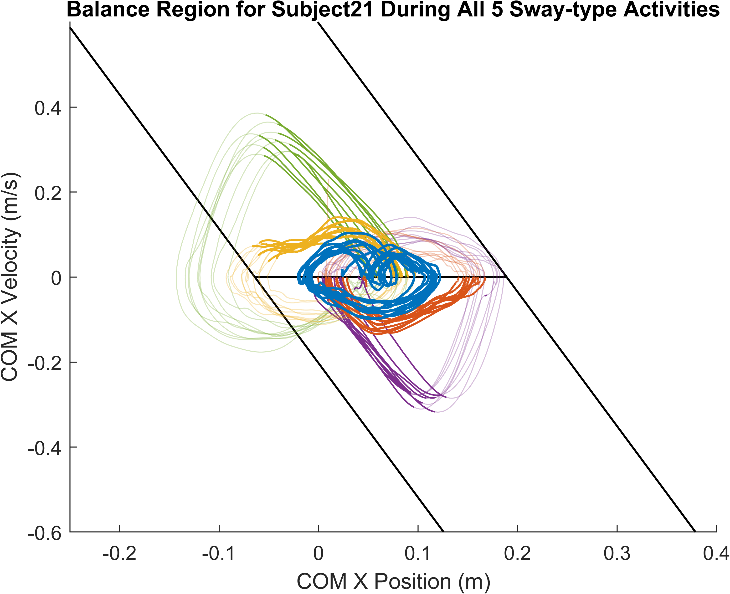

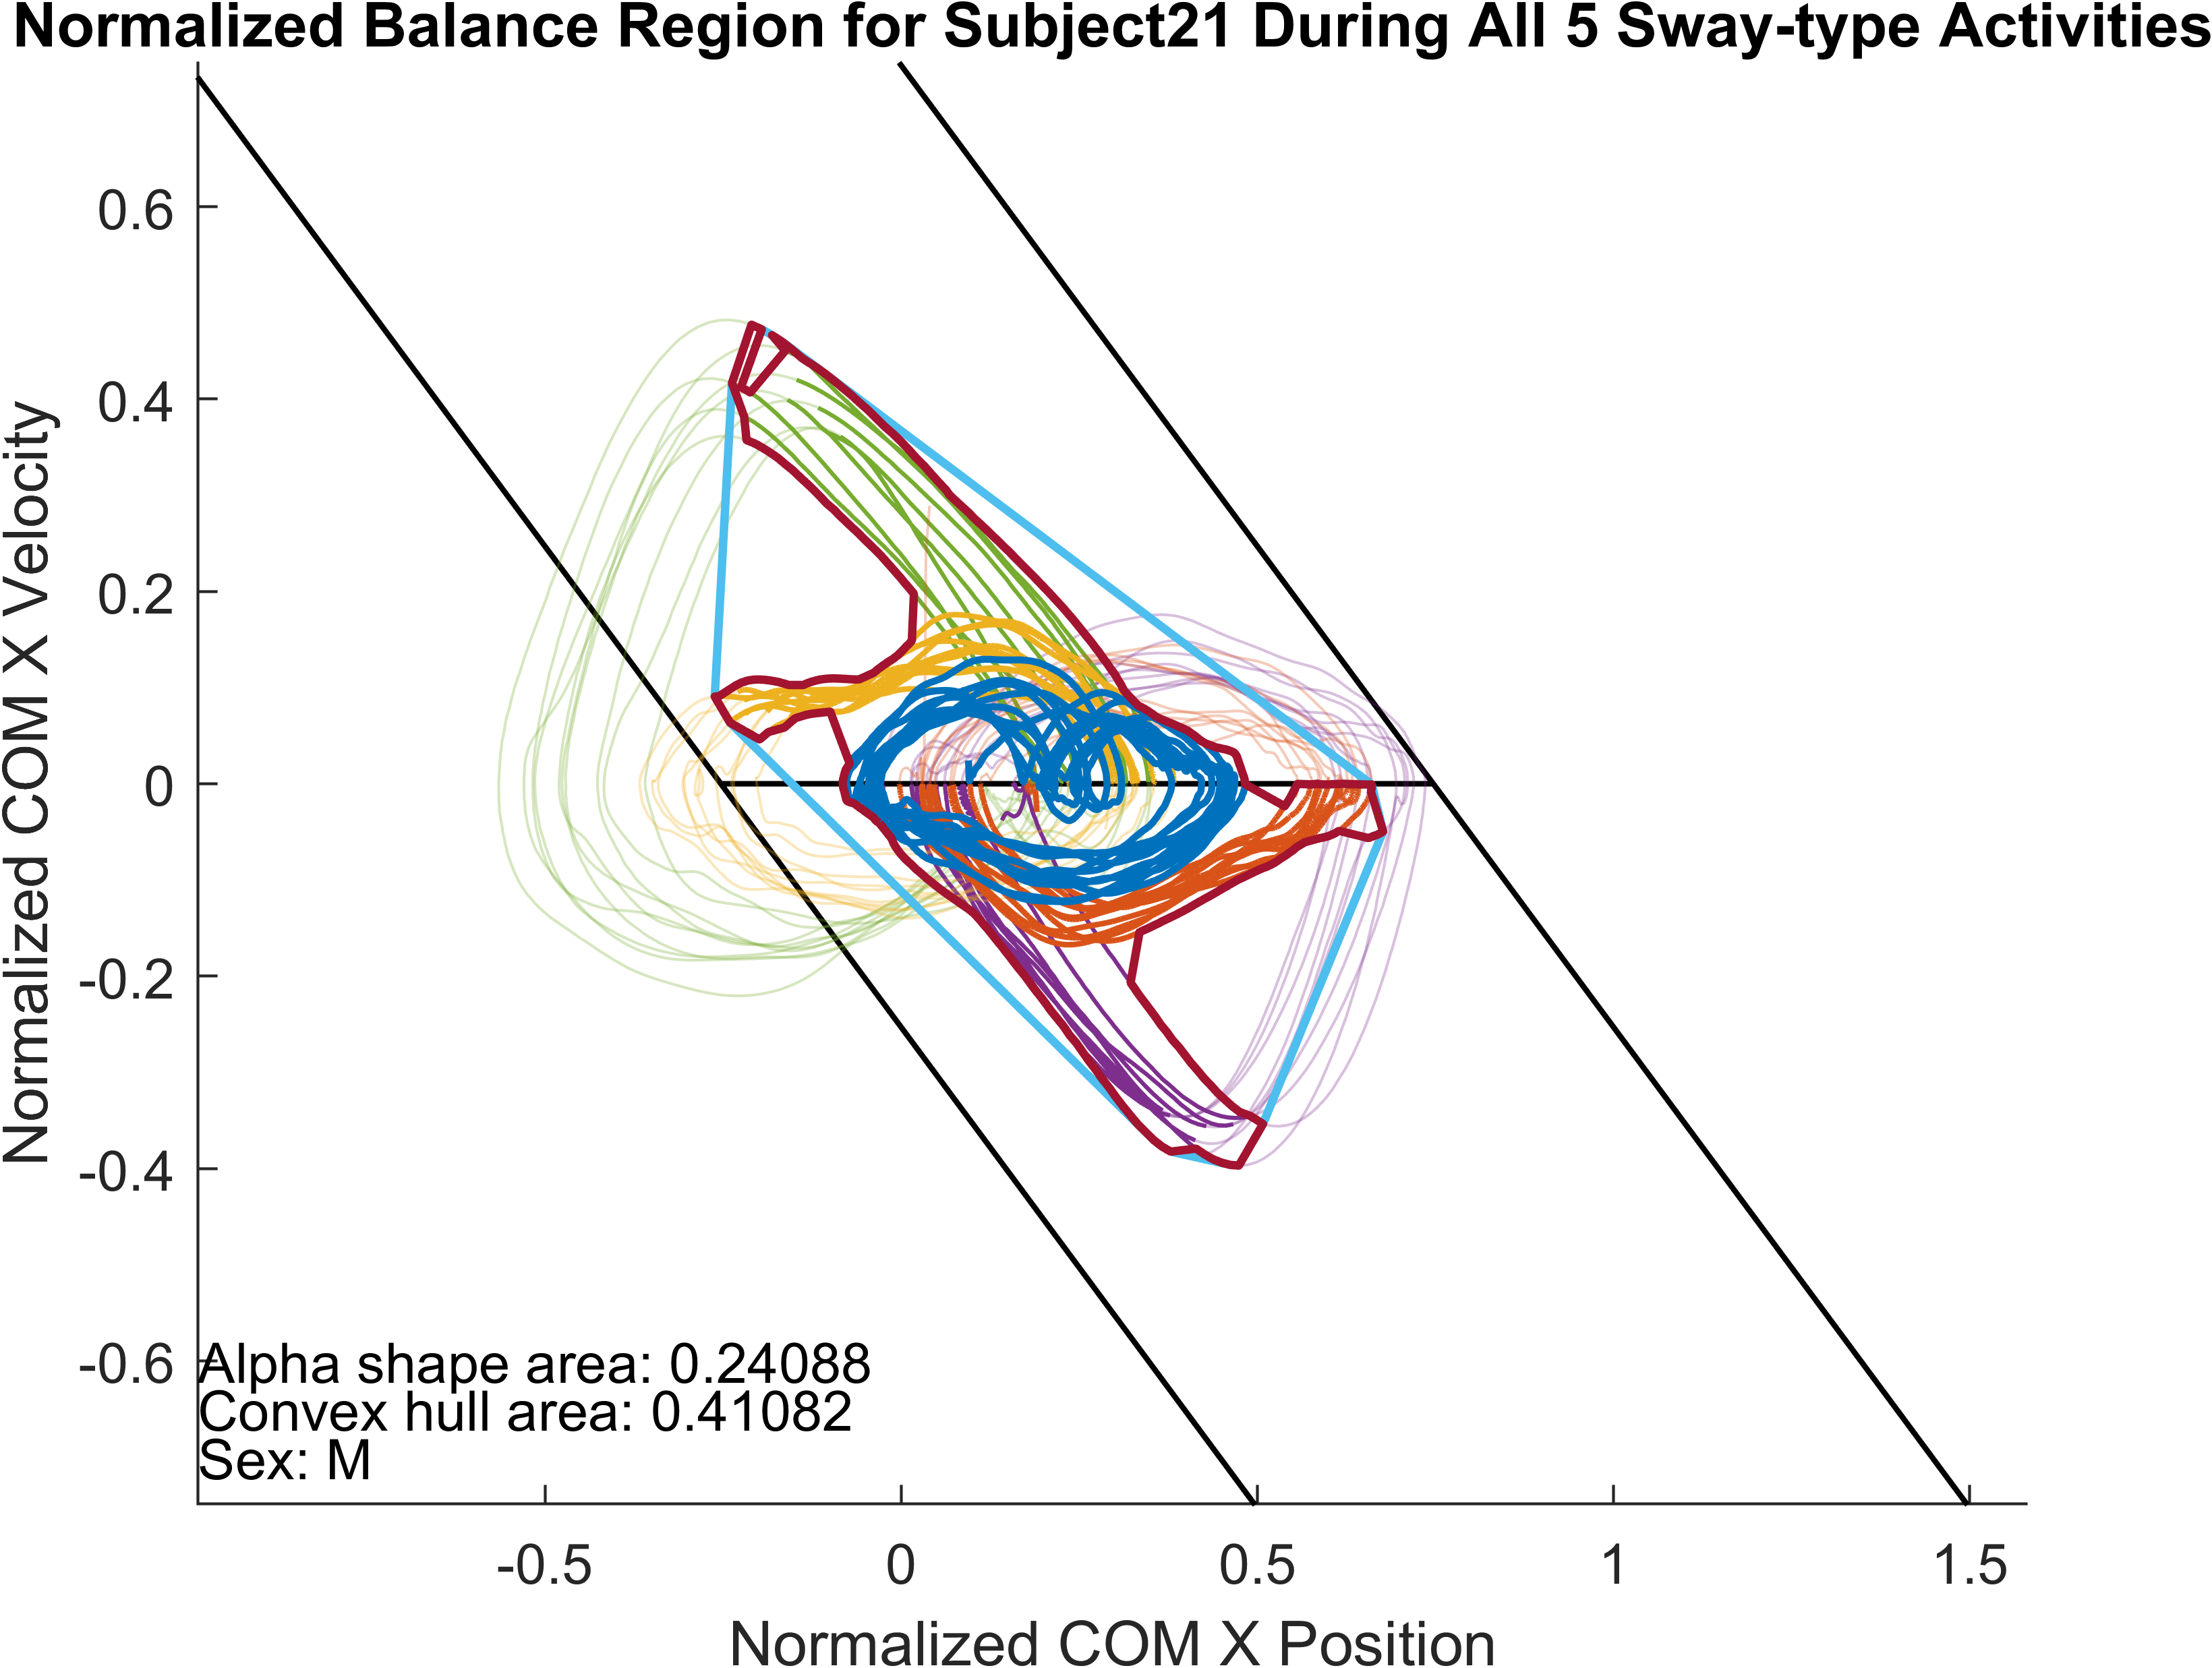


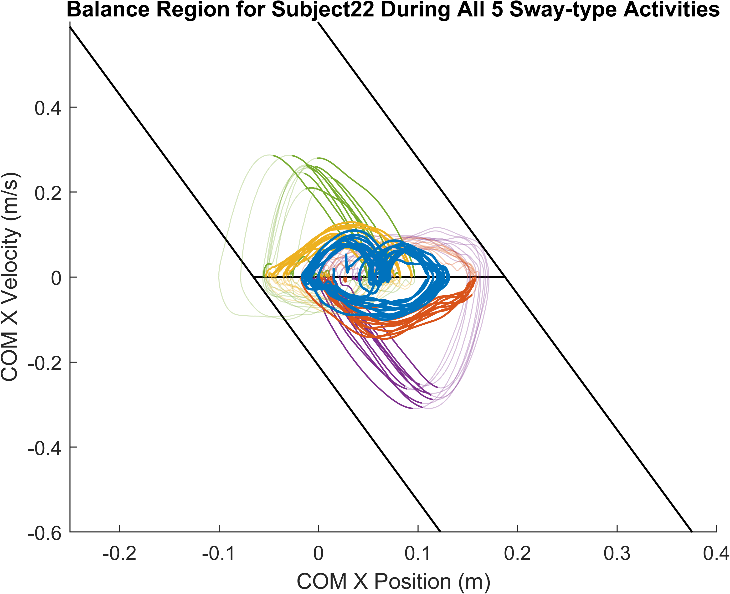

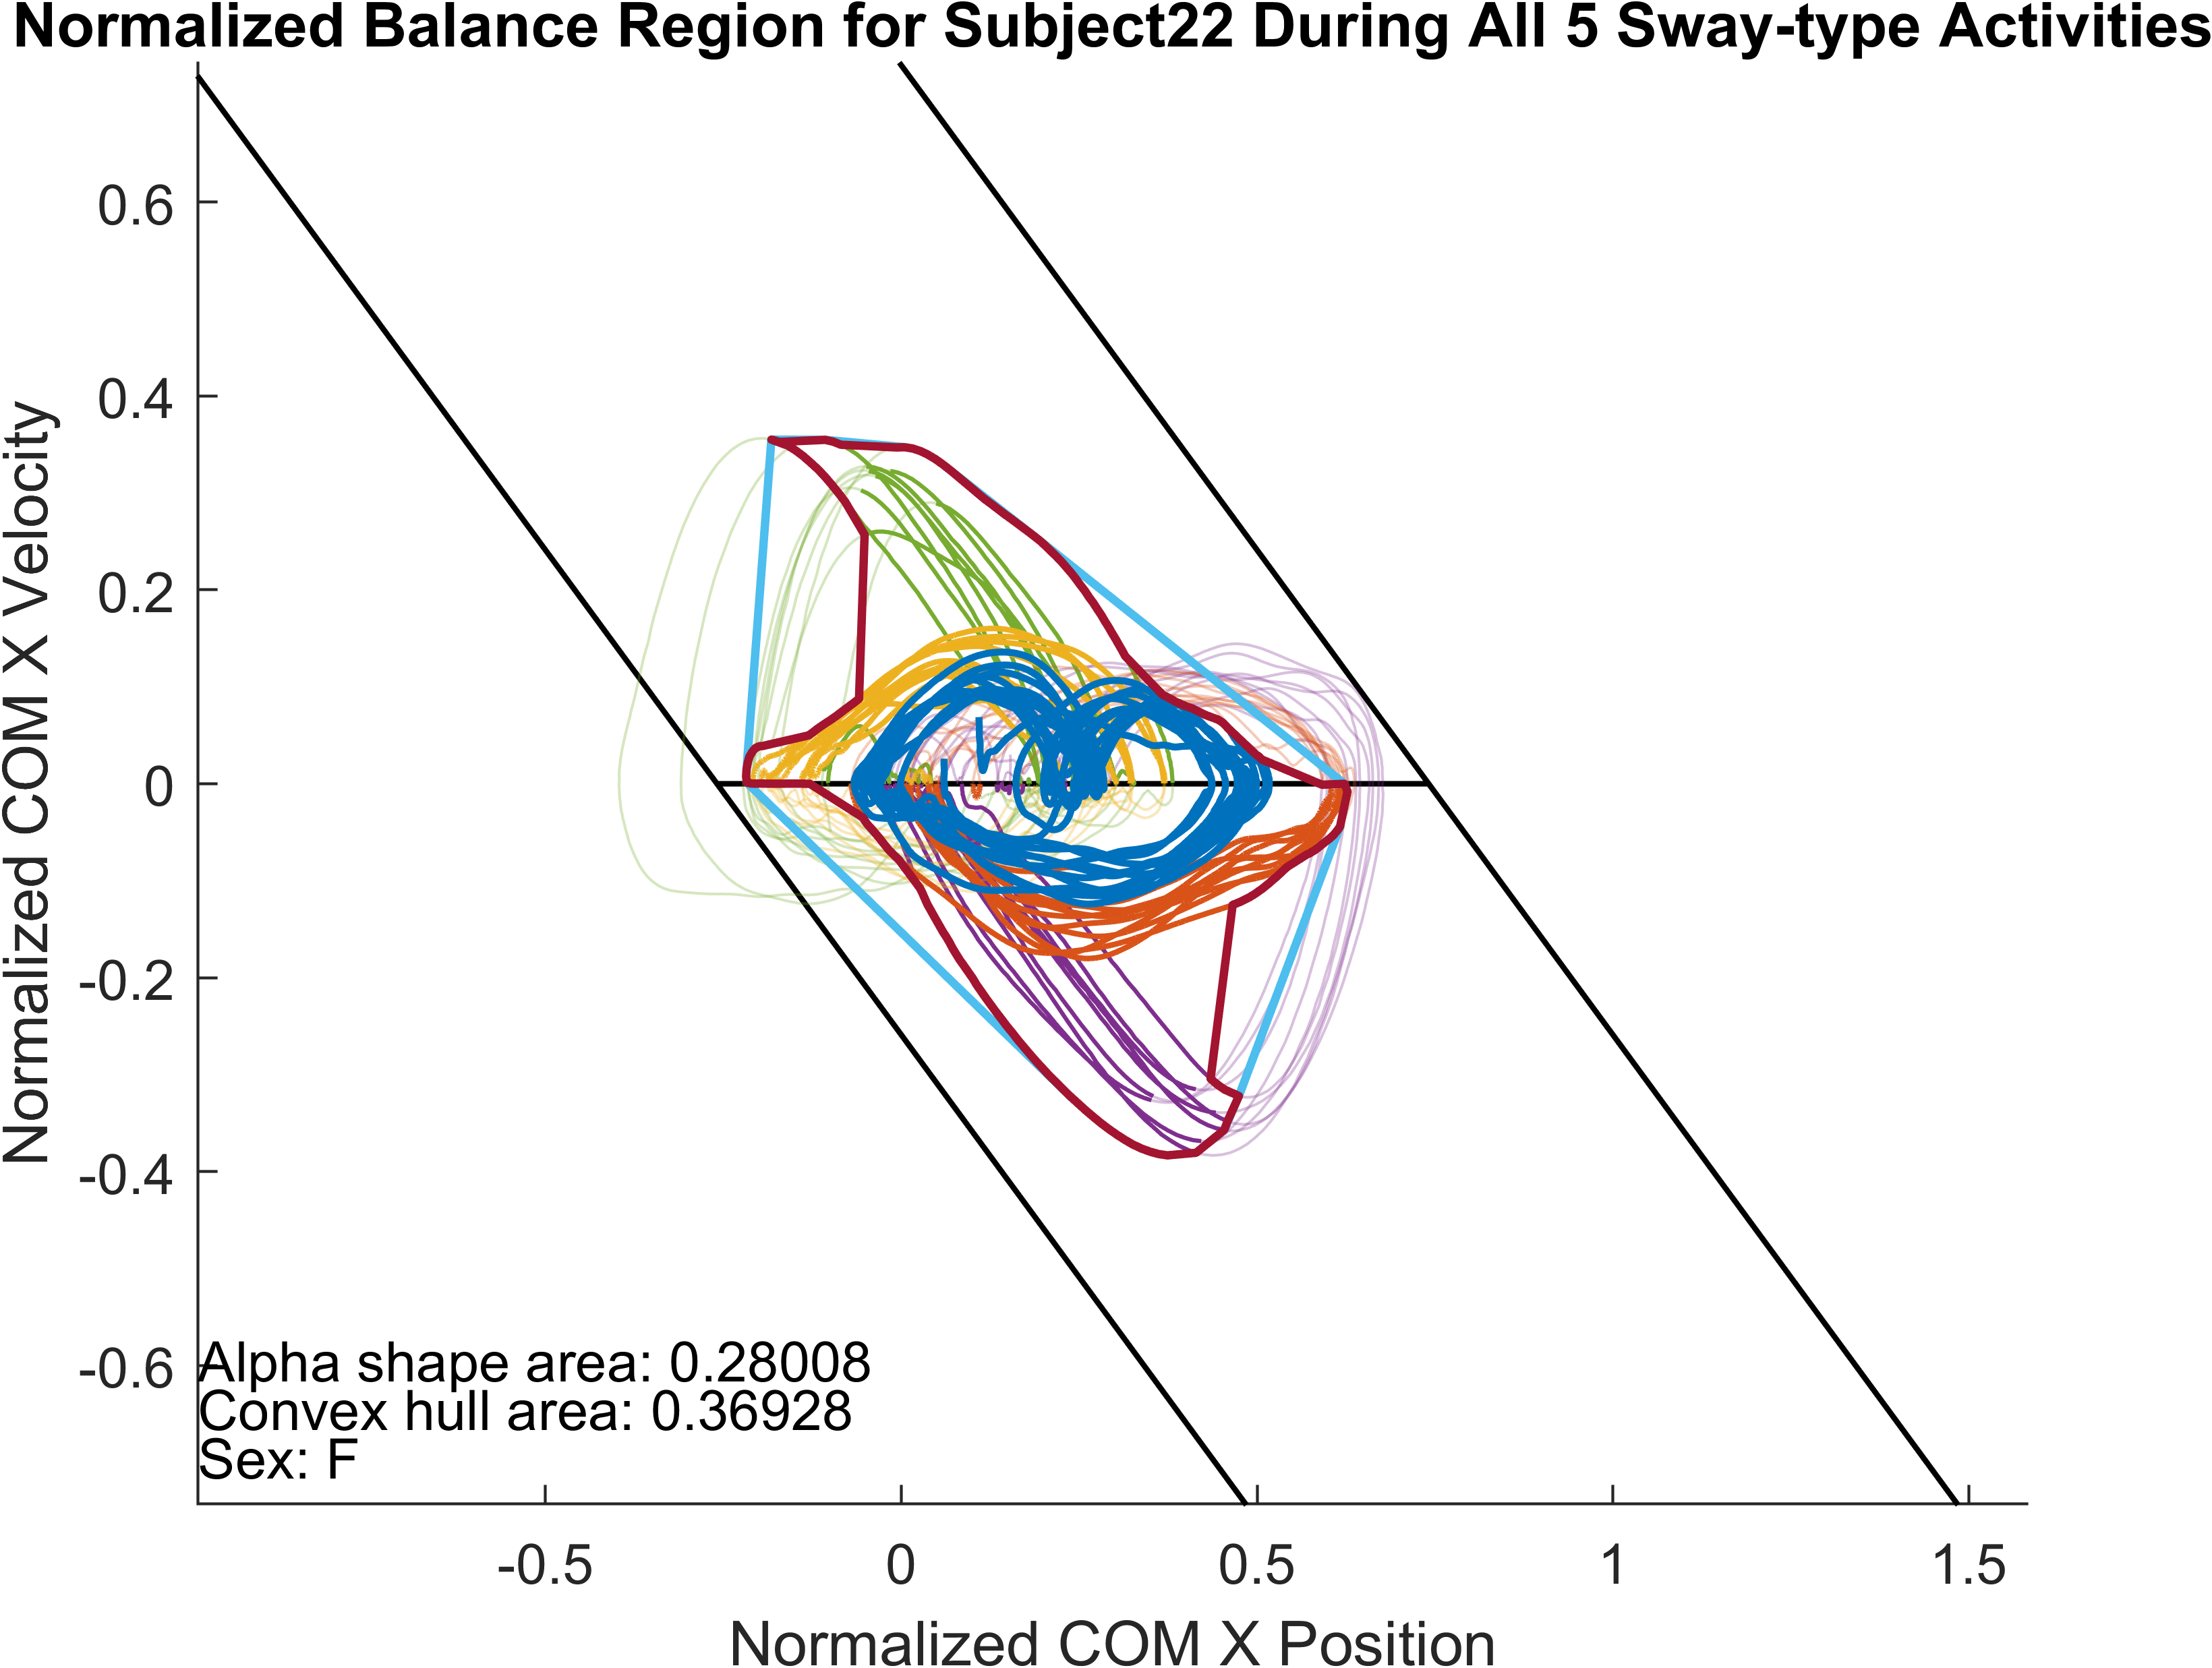


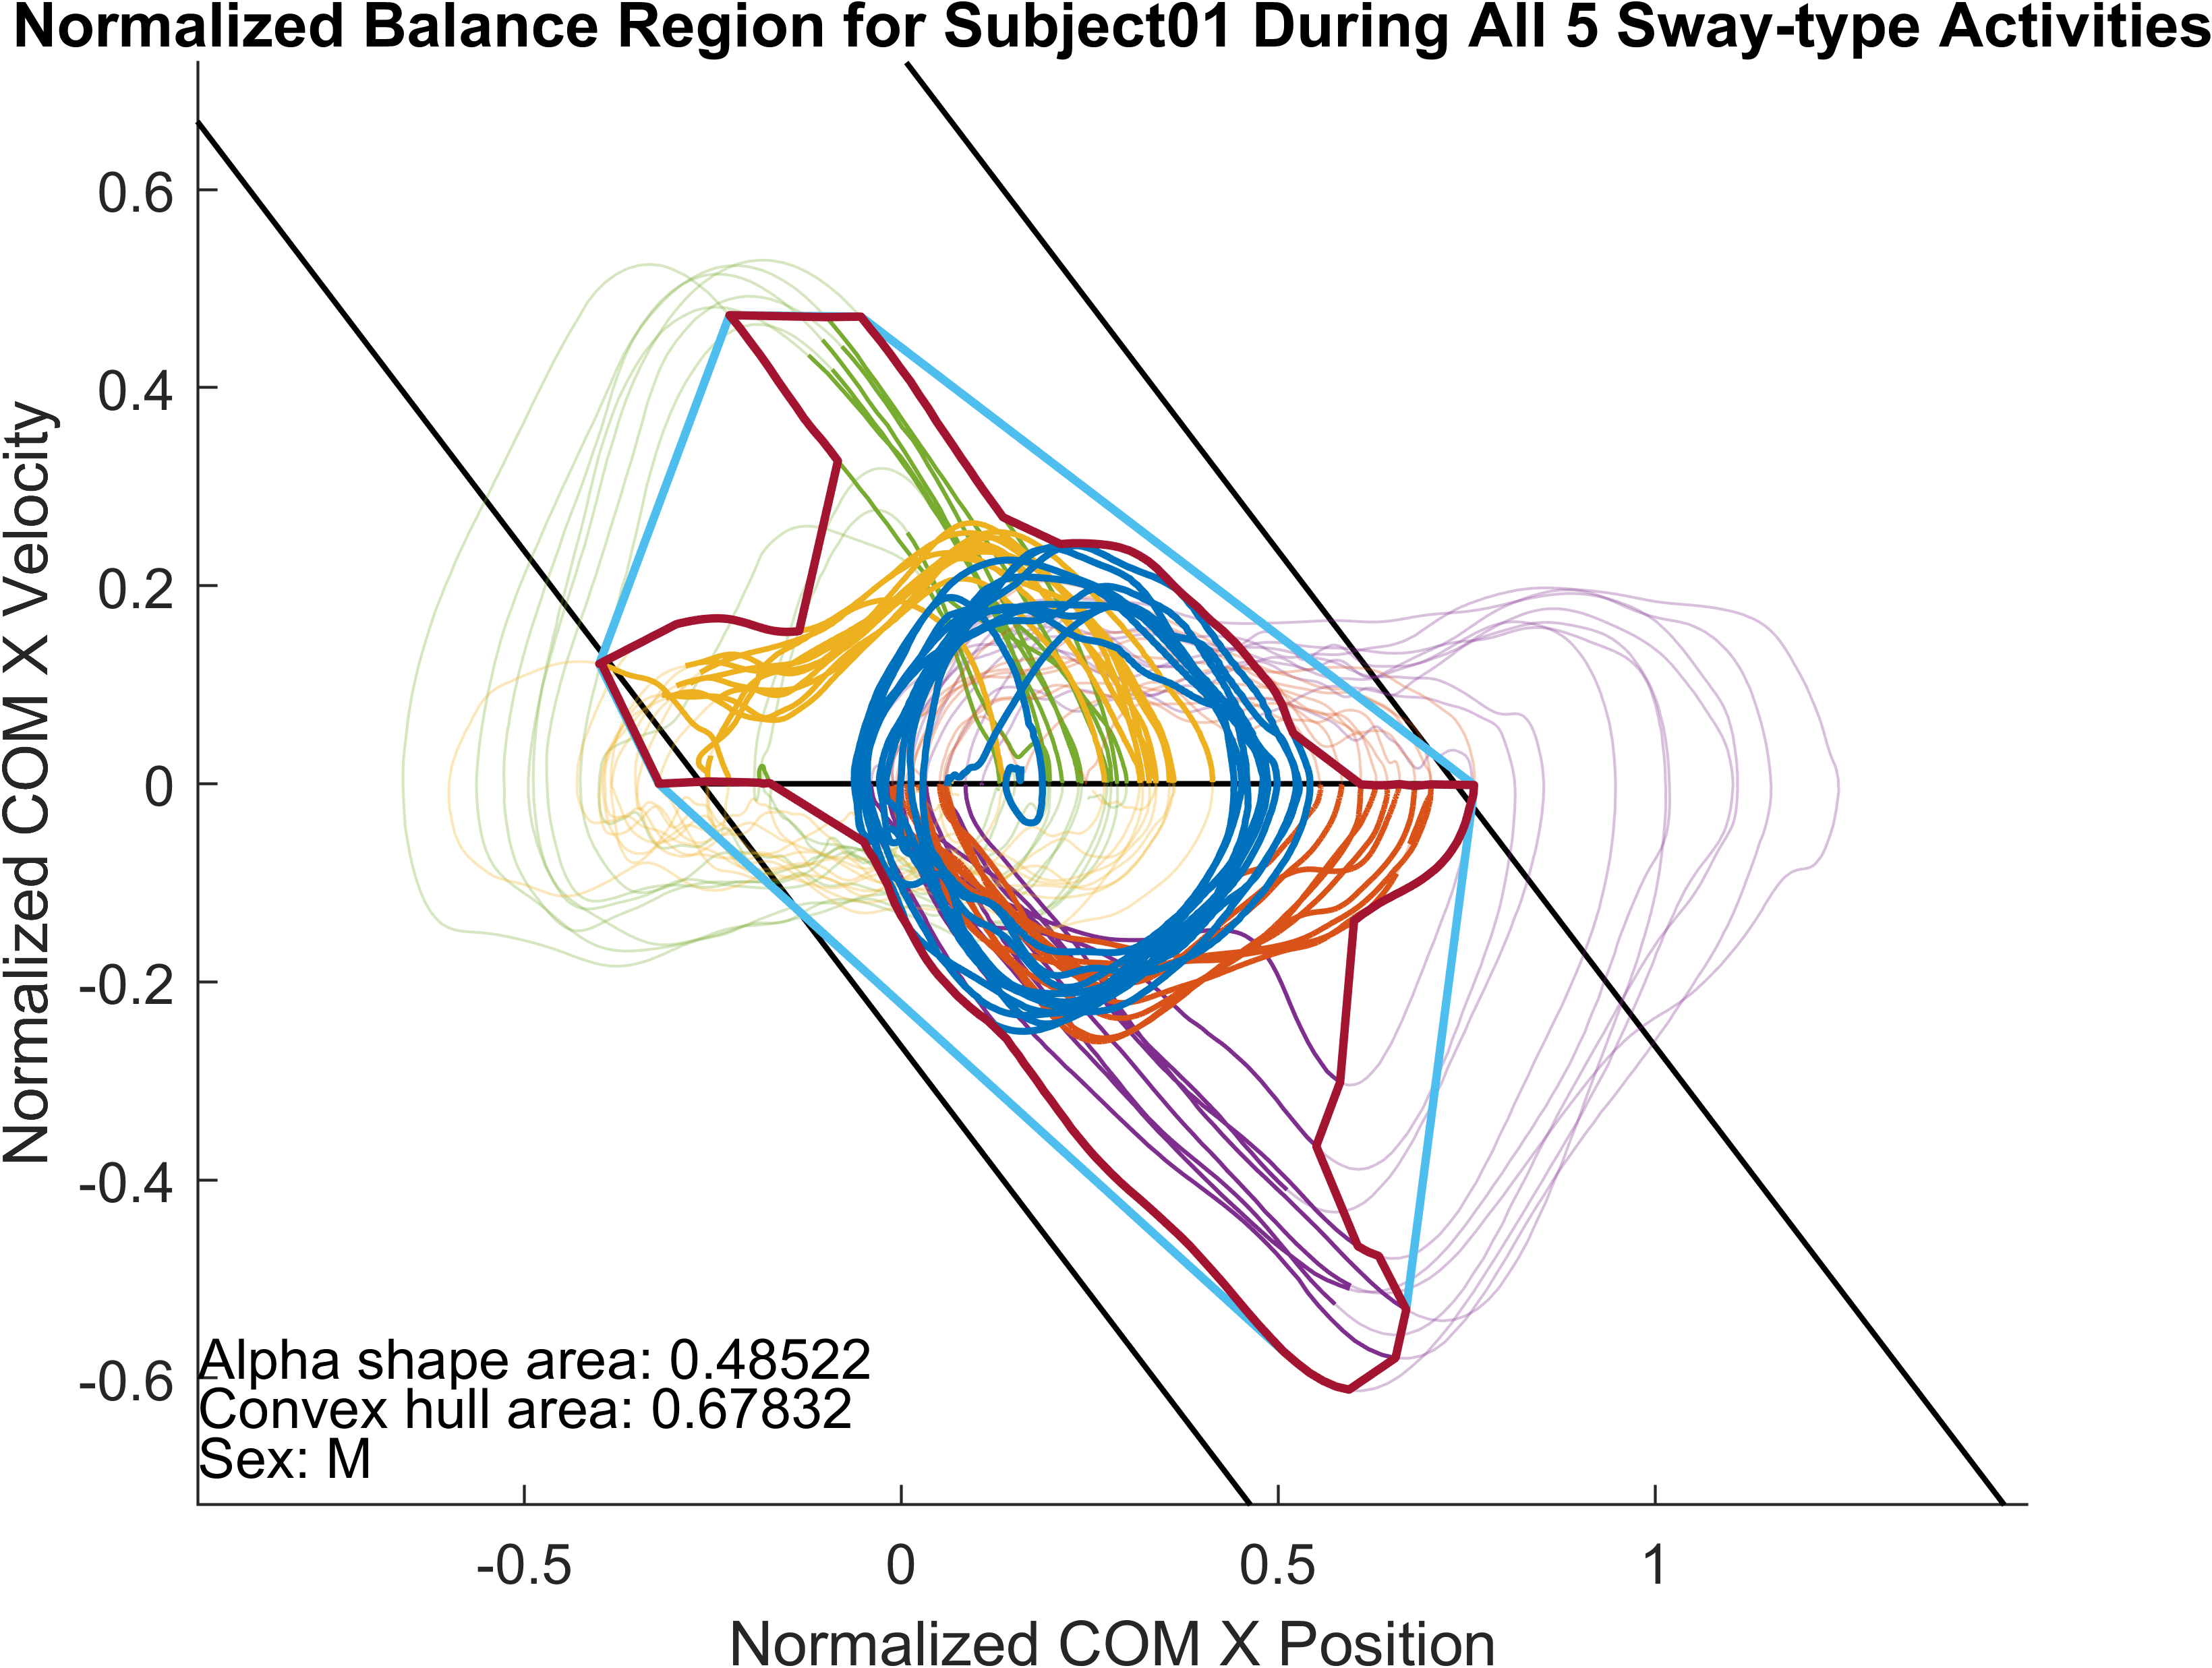

Supplement: Supplementary file 3 [file 76895a999e2e7e7732d1c30c.docx]
